# Supplementary material for: Study of the Metabolic Profiles of “Indazole-3-Carboxamide” and “Isatin Acyl Hydrazone” (OXIZID) Synthetic Cannabinoids in a Human Liver Microsome Model Using UHPLC-QE Orbitrap MS
Source: MDPI journal article supplement (doi:10.3390/metabo13040576), 2023-04-18

**Figure S7. Mass spectrometry spectra and fragmentation of ADB-BUTINACA and its metabolites.**

**A0**

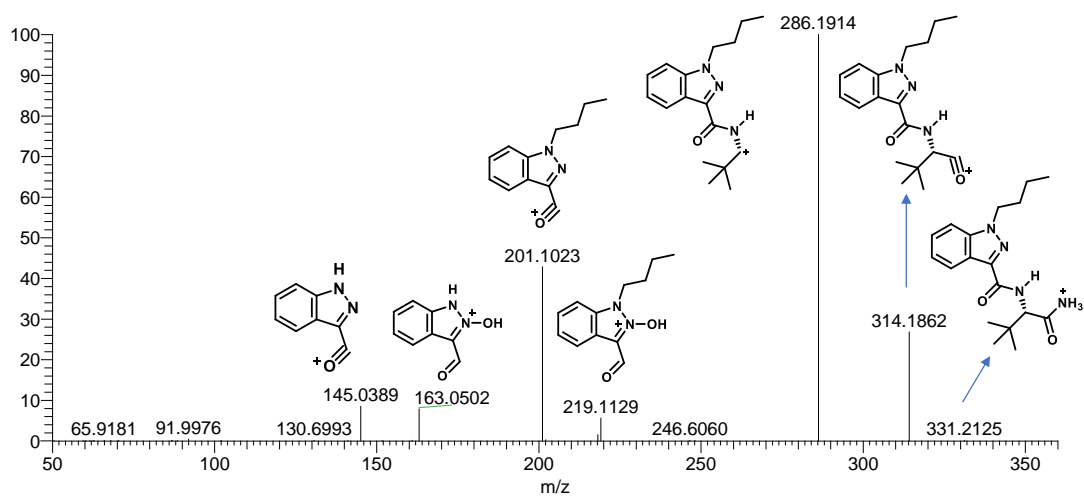

**A1**

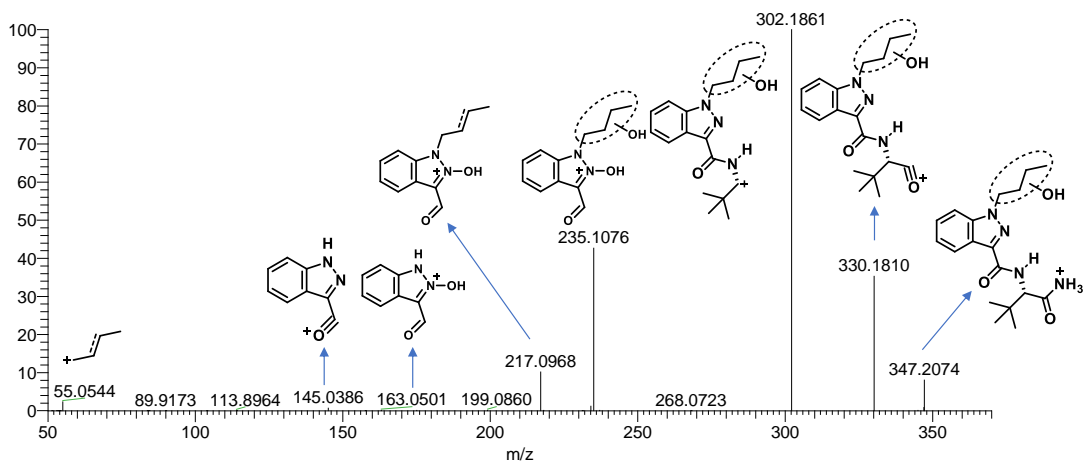

**A2**

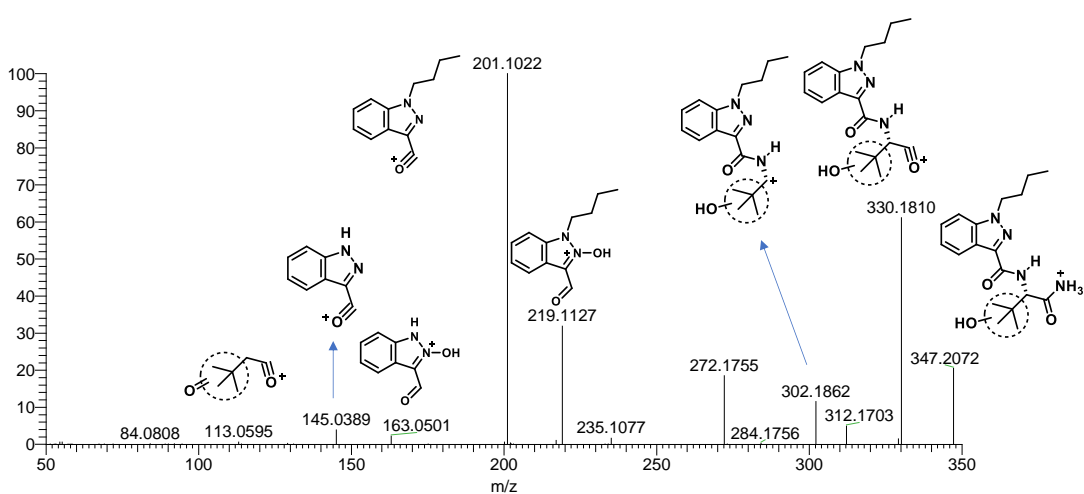

**A3**

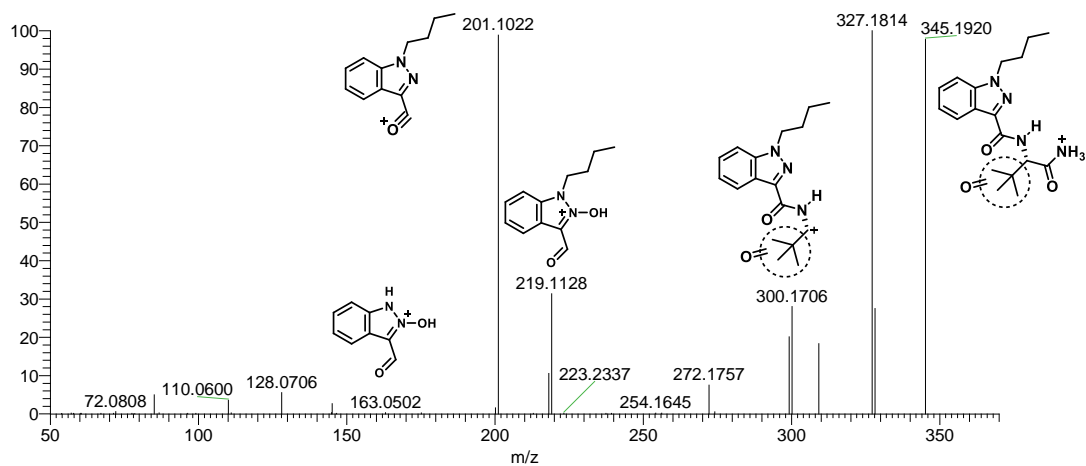

**A4,5**

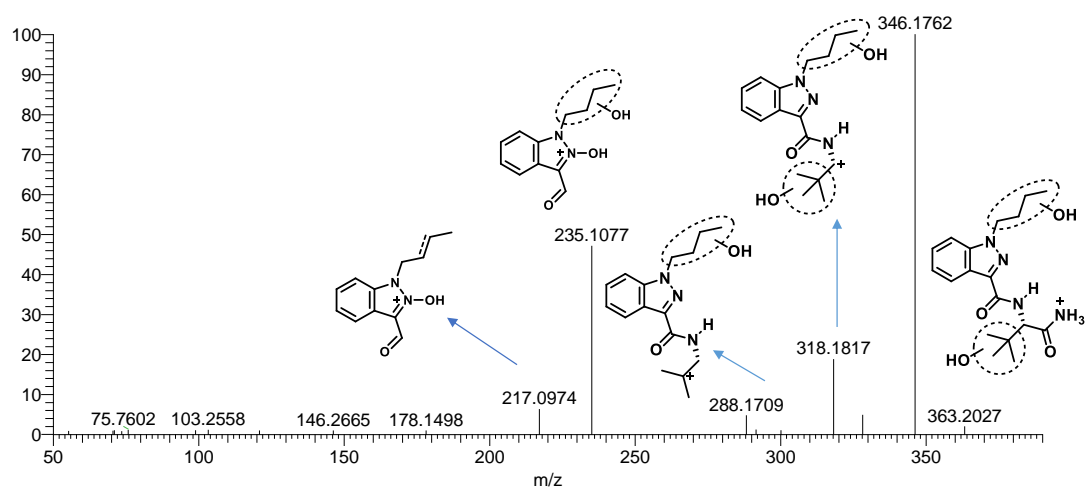

**A6**

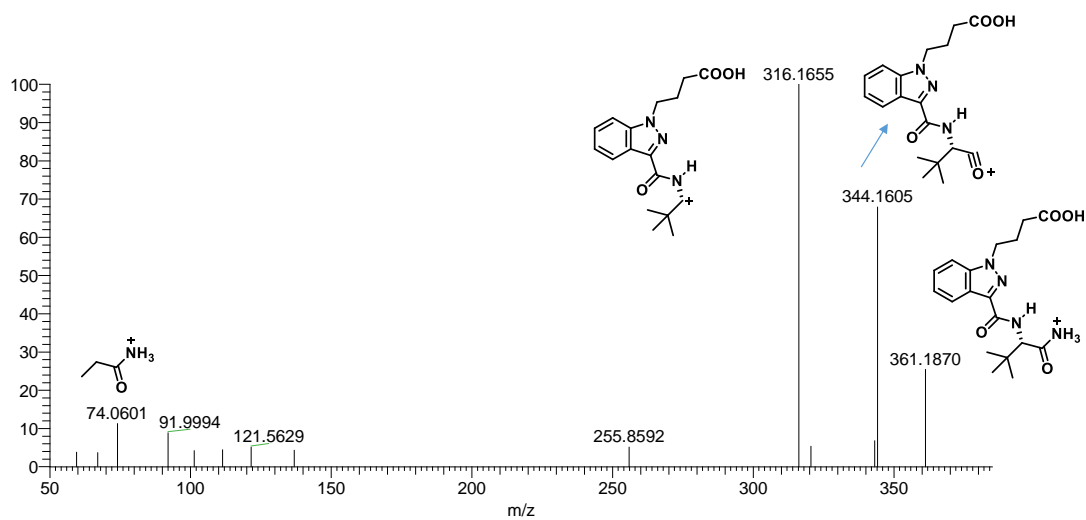

**A7**

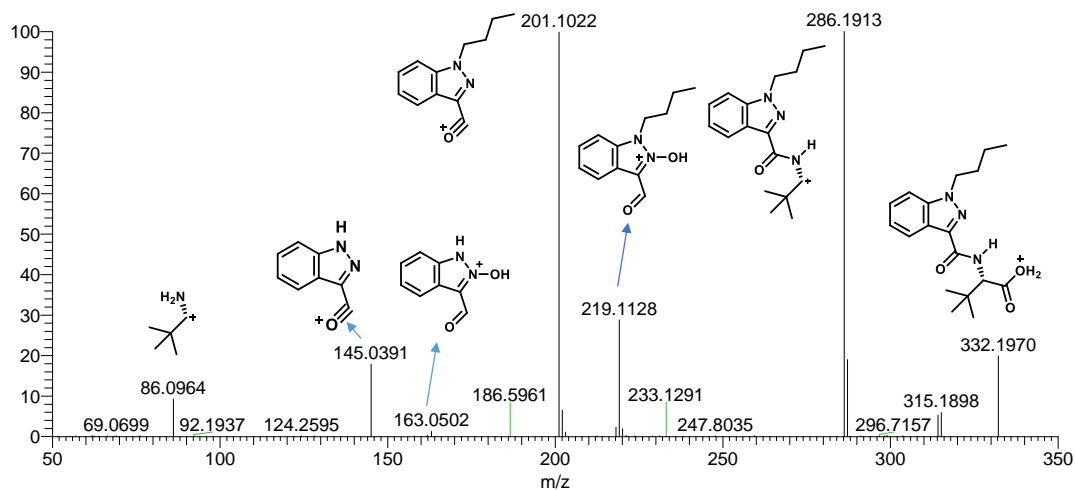

**A8**

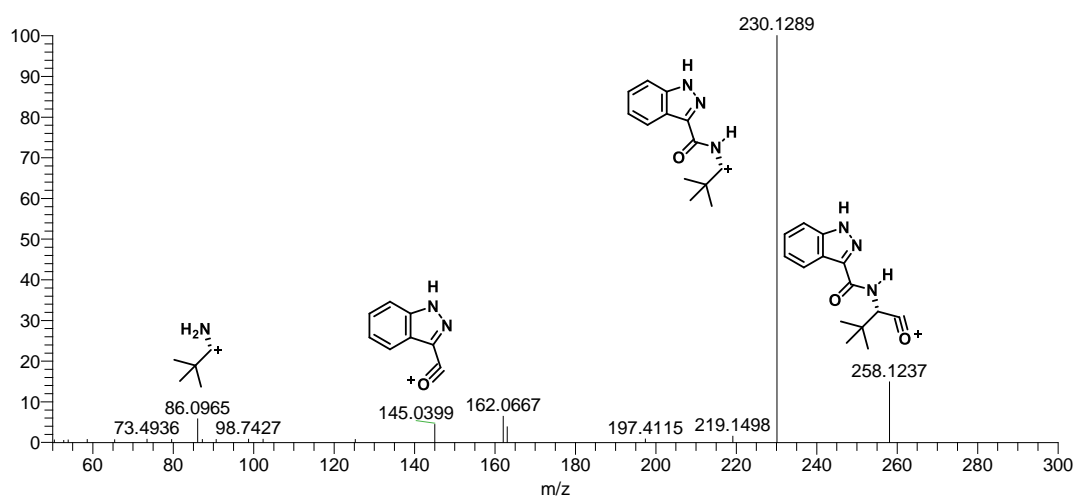

**A9**

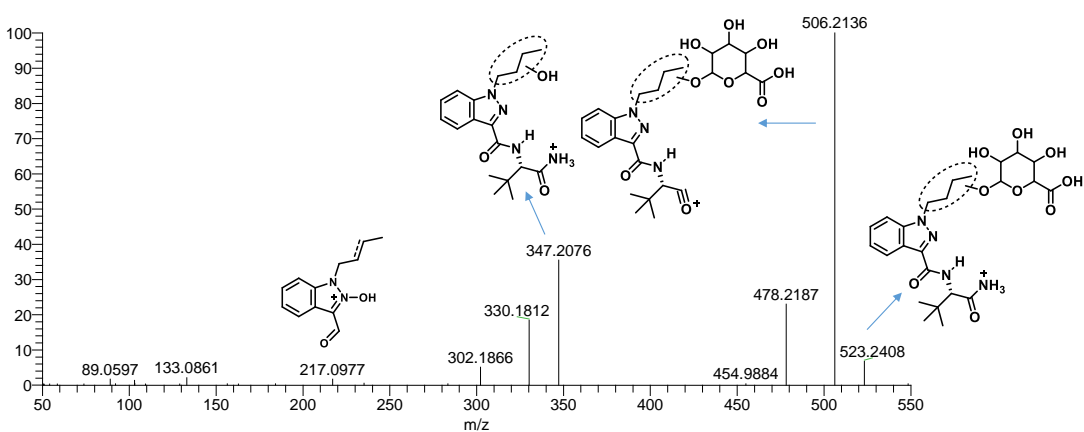

**Figure S8. Mass spectrometry spectra and fragmentation of MDMB-4en-PINACA and its metabolites.**

**B0**

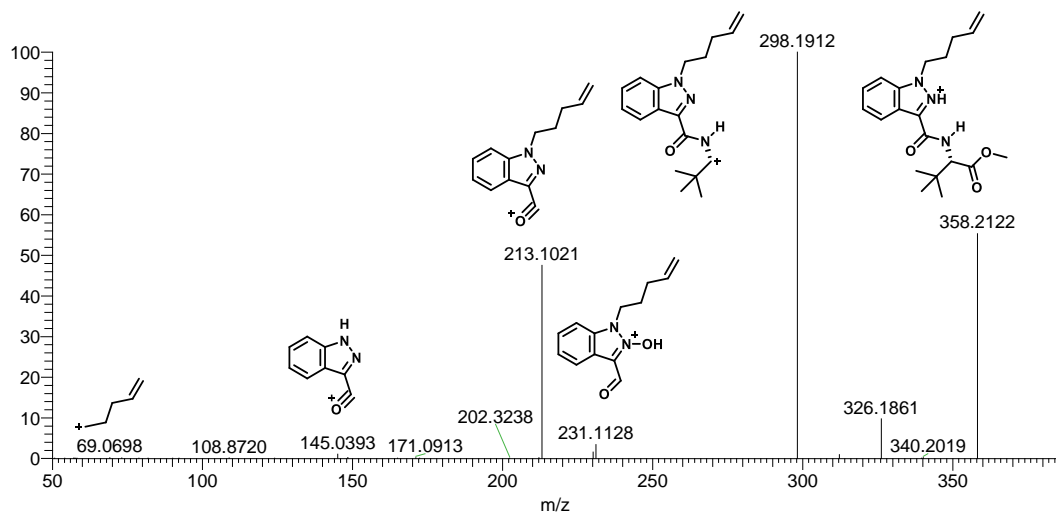

**B1**

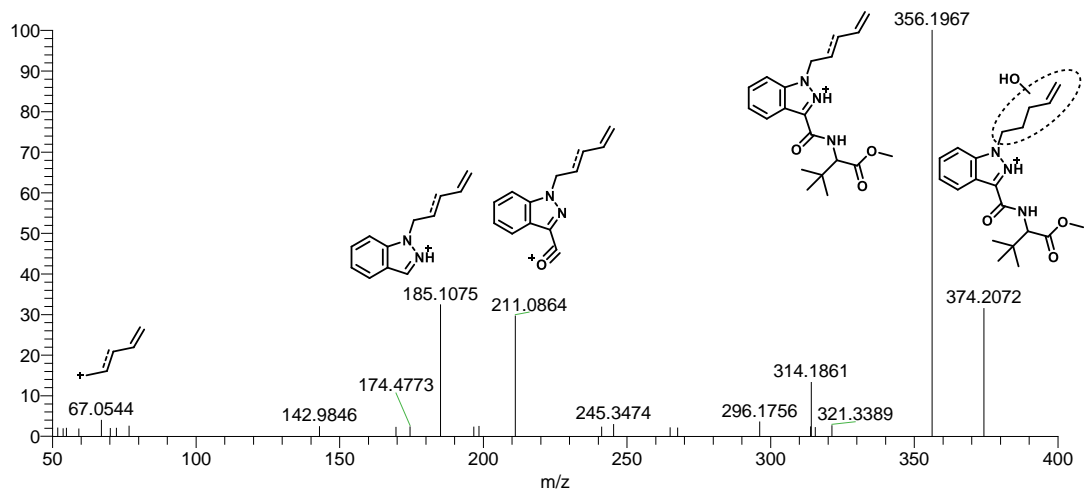

**B2,3**

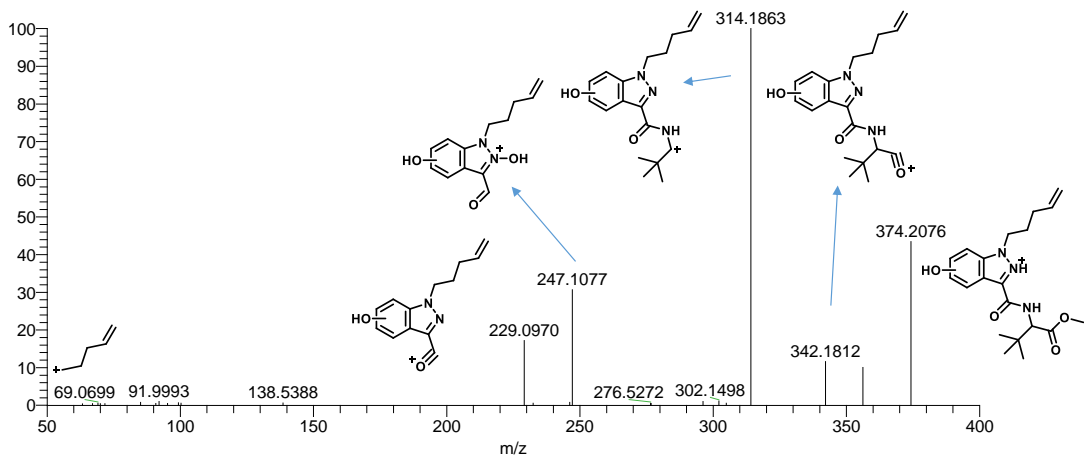

**B4,5**

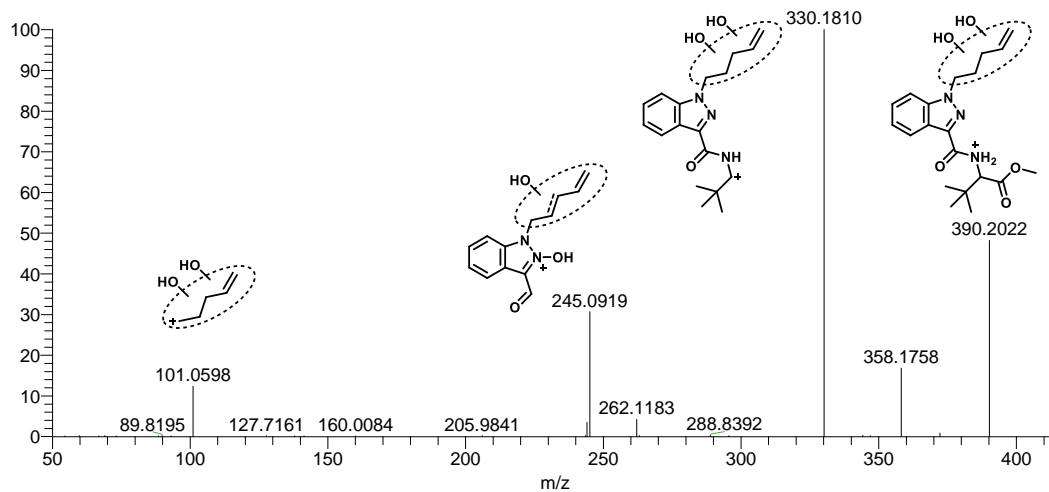

B6,7

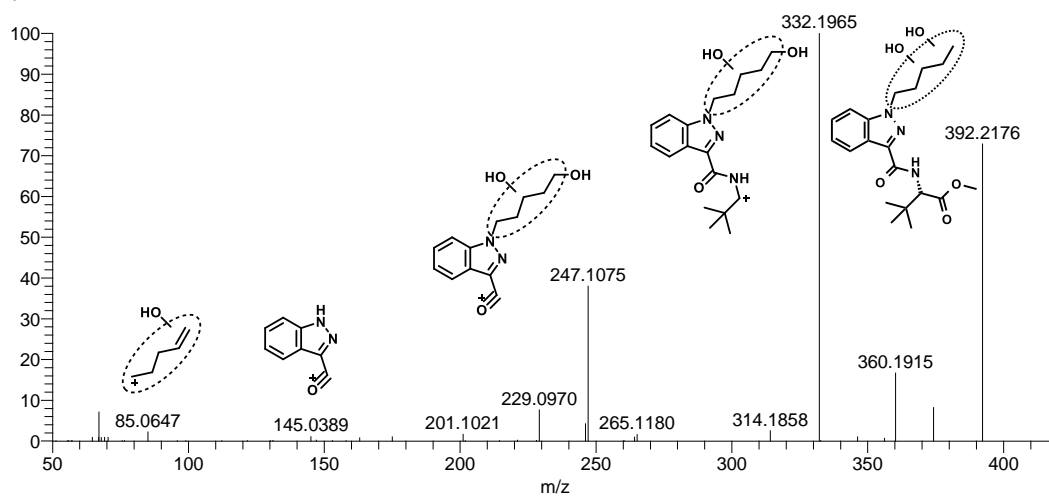

B8

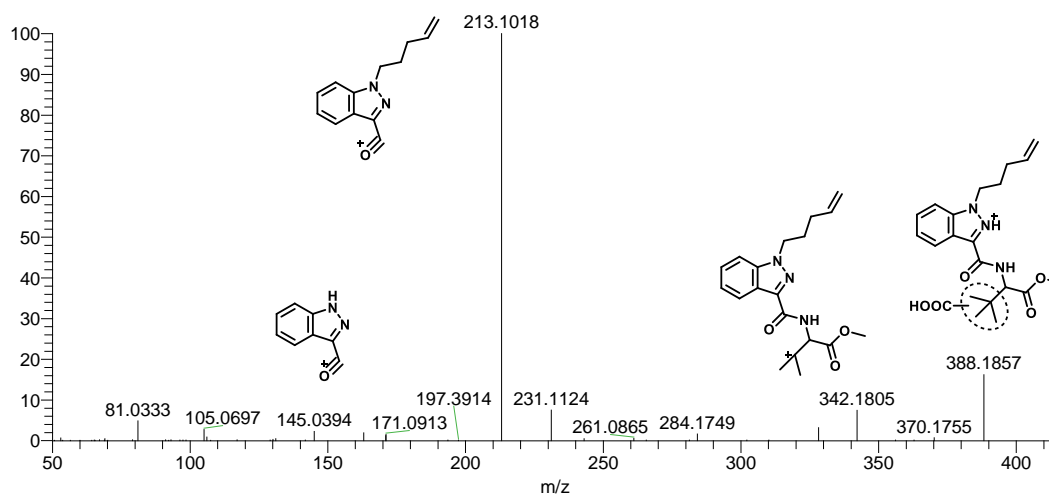

B9

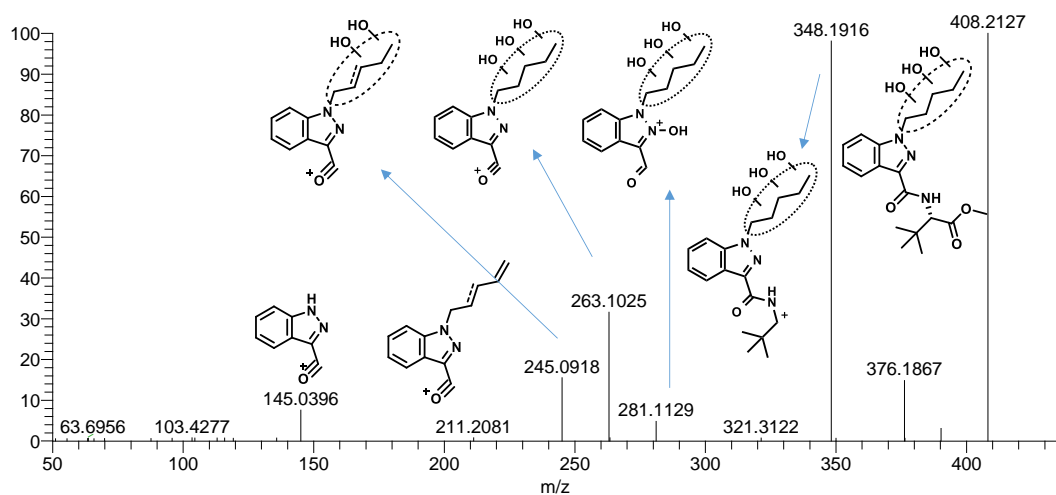

**B10**

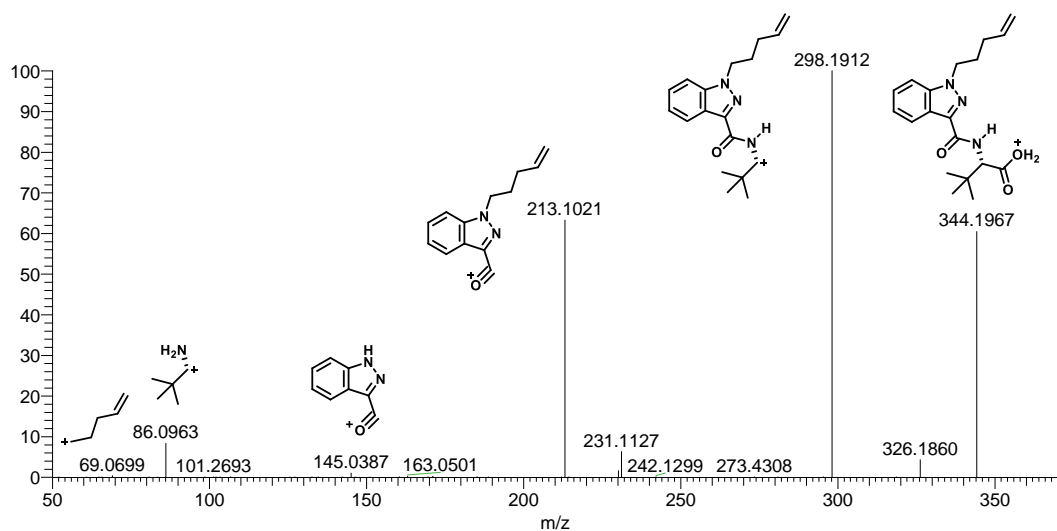

**B11**

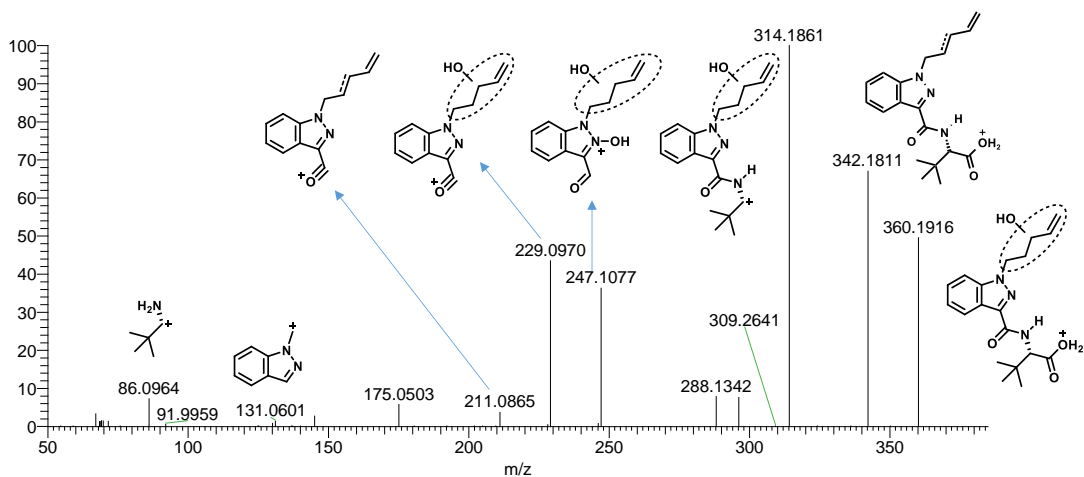

**B12**

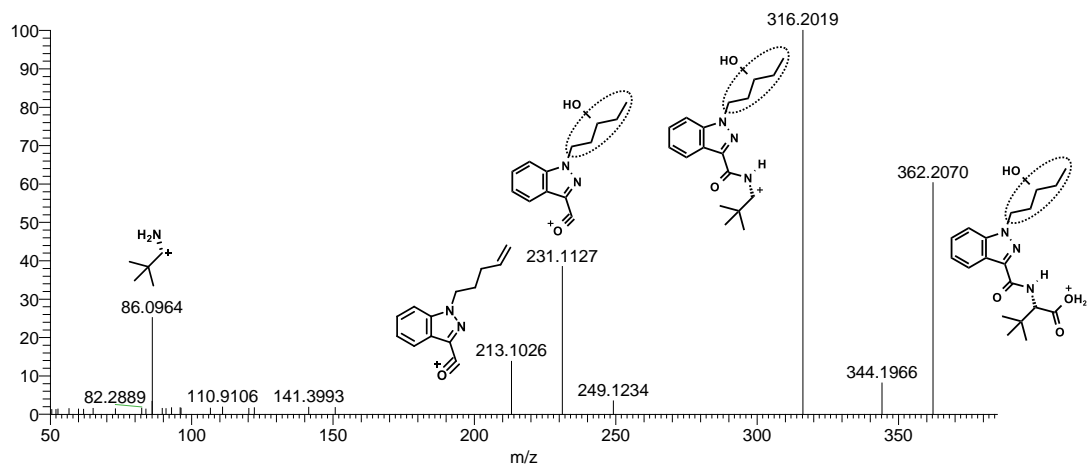

**B13,14**

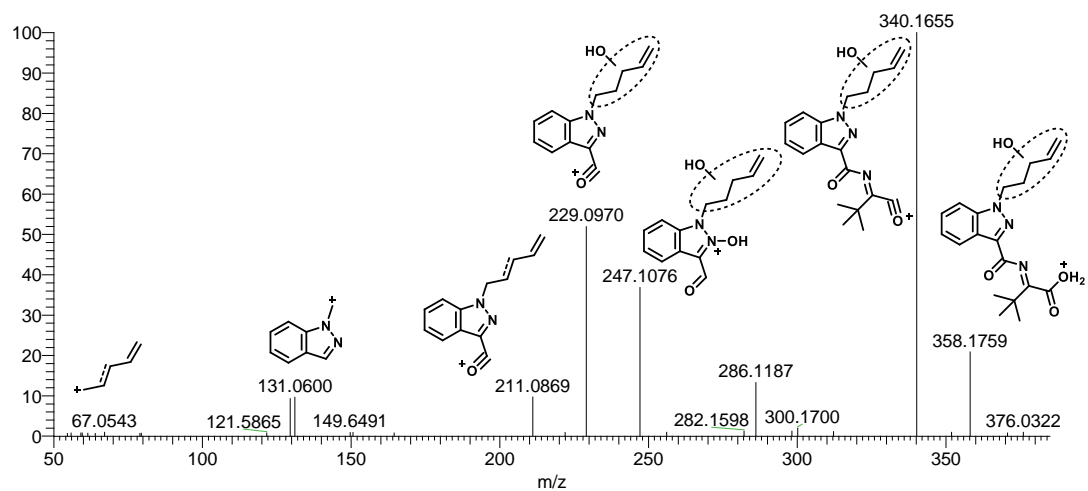

**B15**

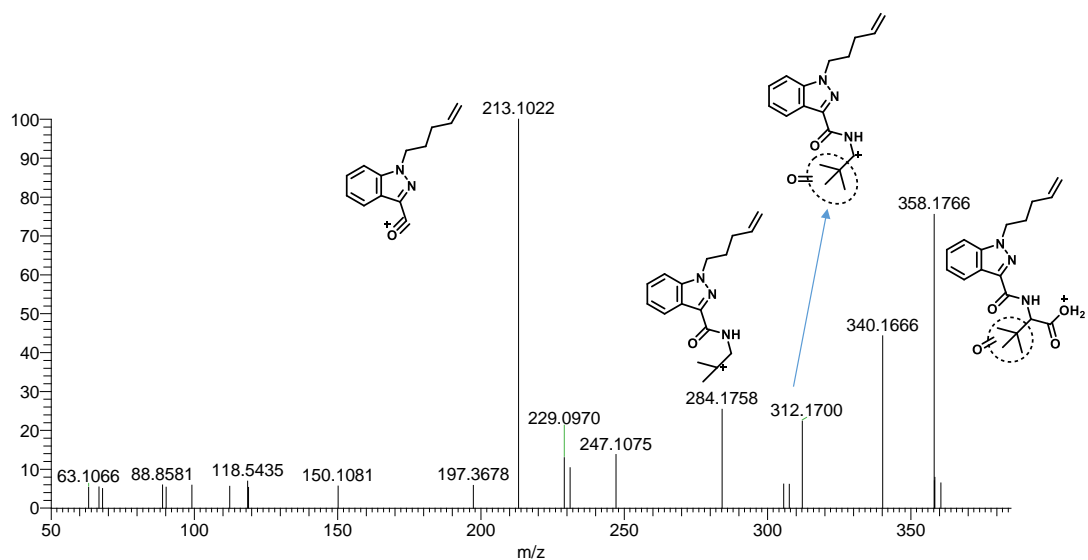

**B16,17**

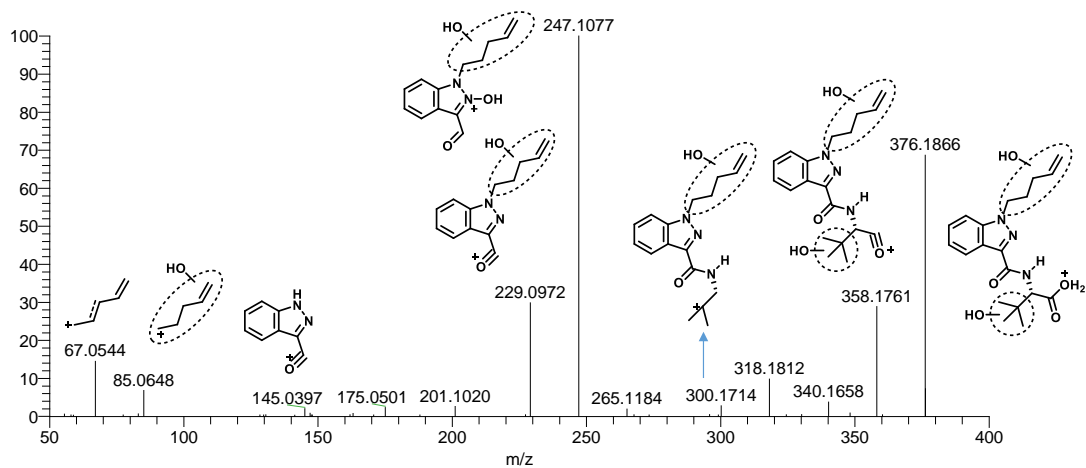

**B18,19**

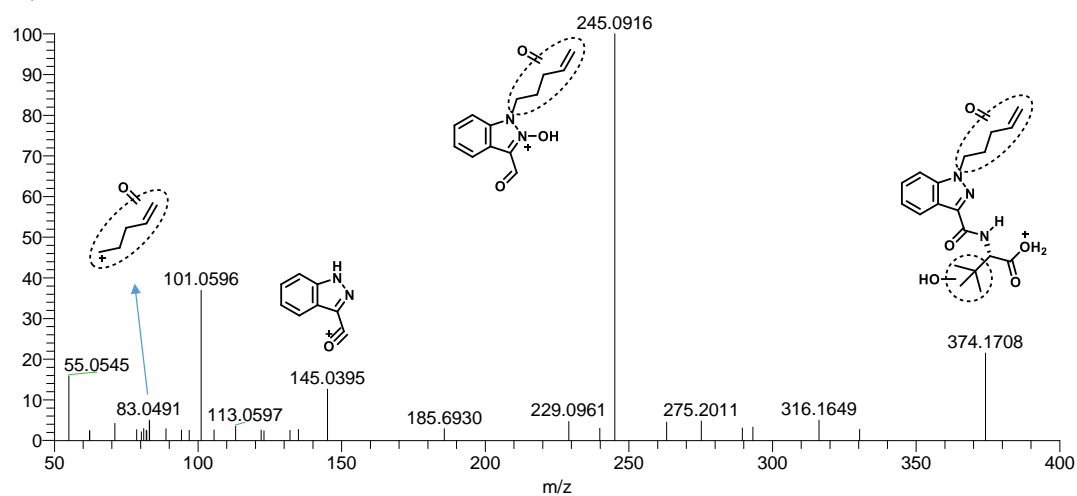

**B20**

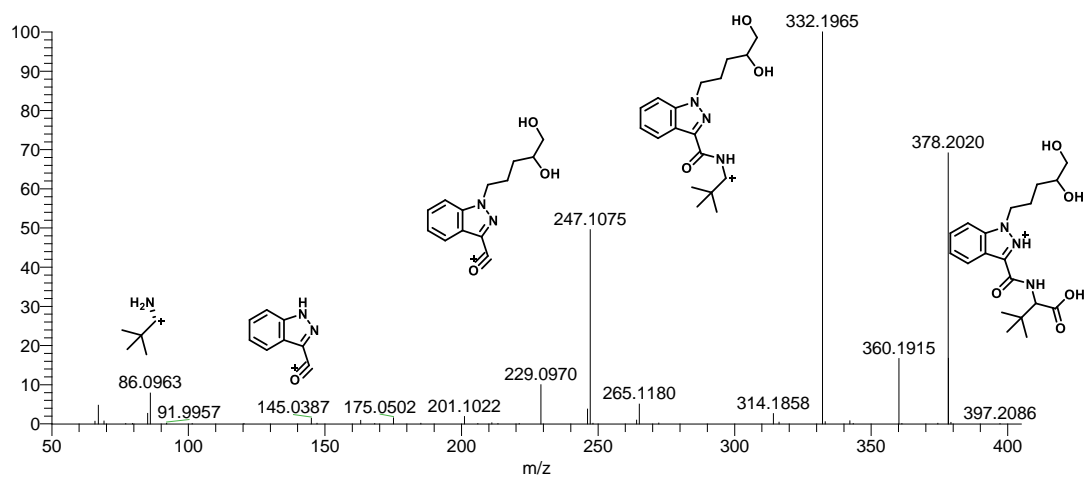

**B21-23**



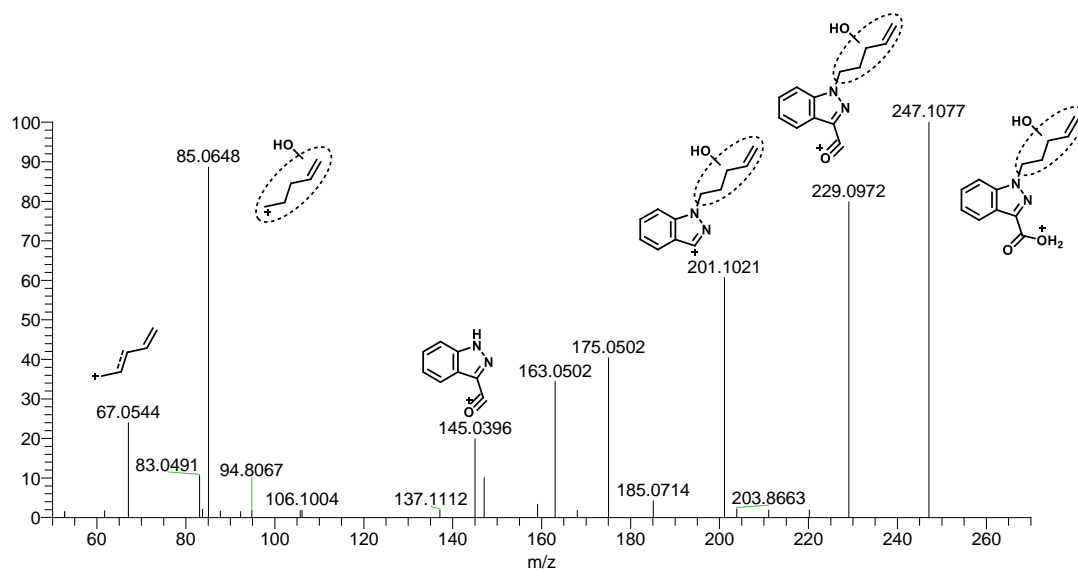

B24

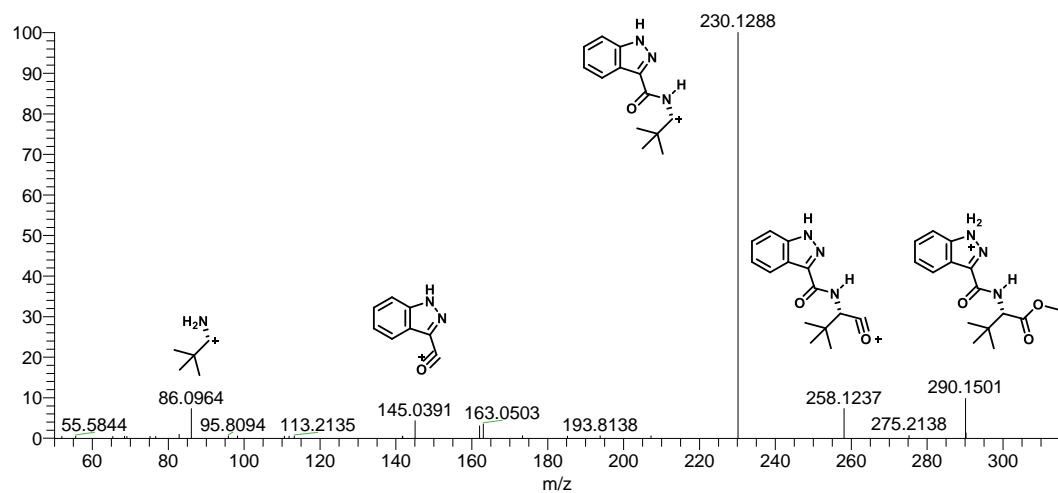

B25-27

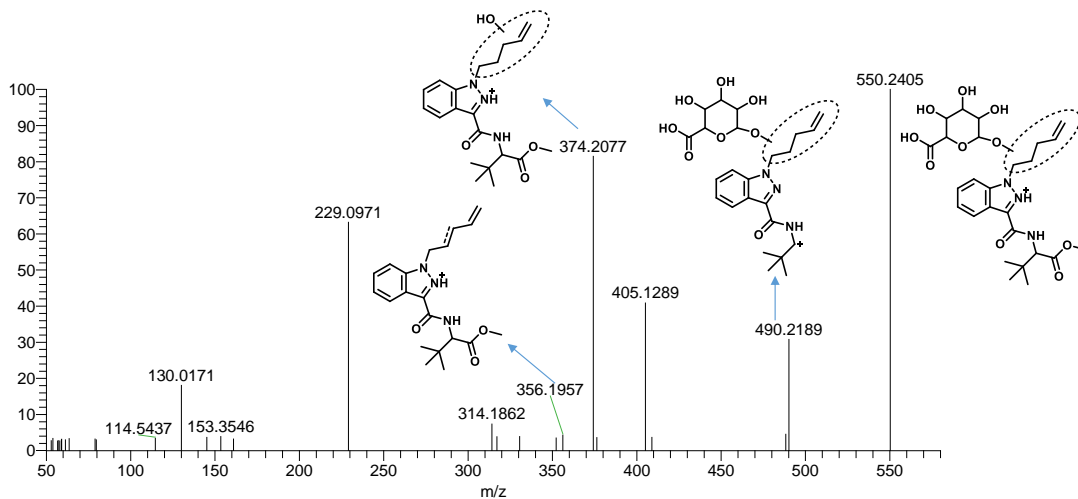

B28

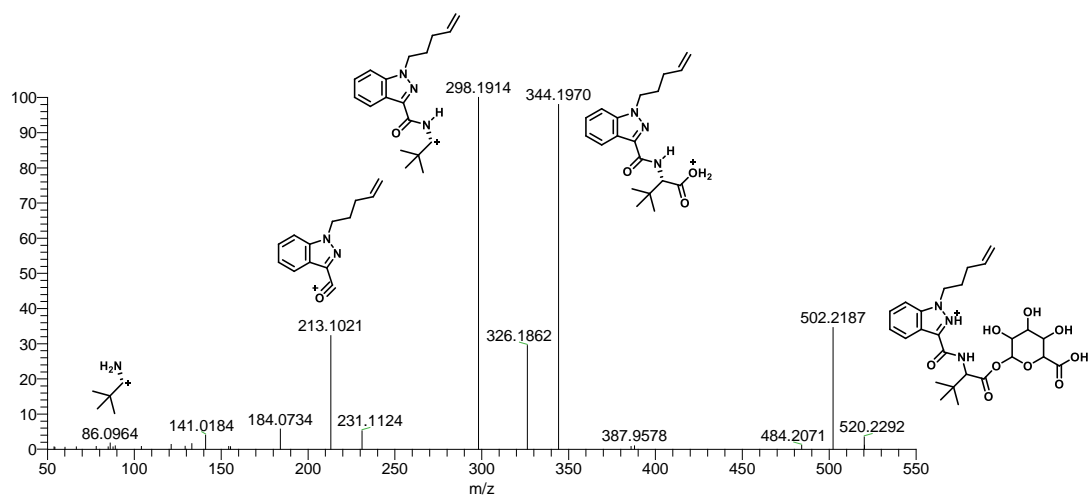

B29

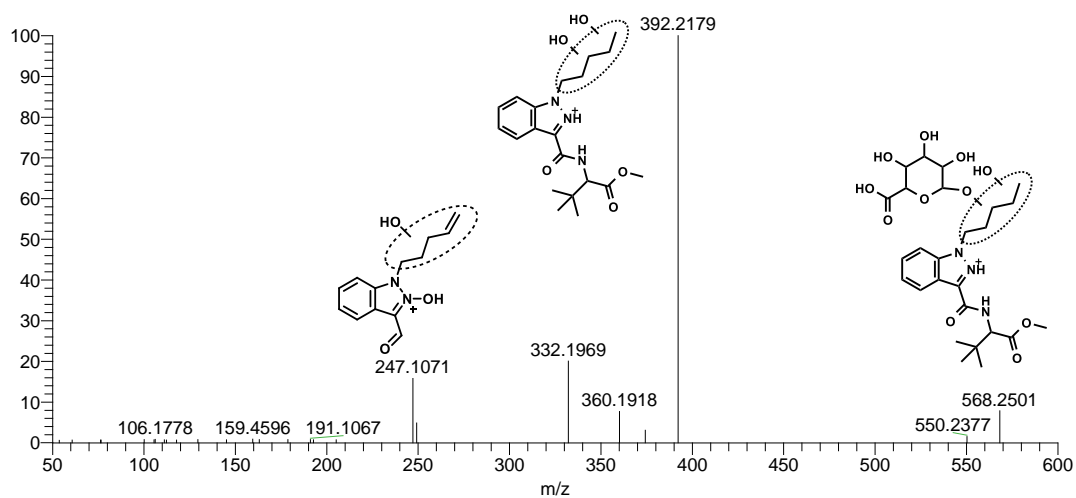

Figure S9. Mass spectrometry spectra and fragmentation of BZO-HEXOXIZID and its metabolites.

C0

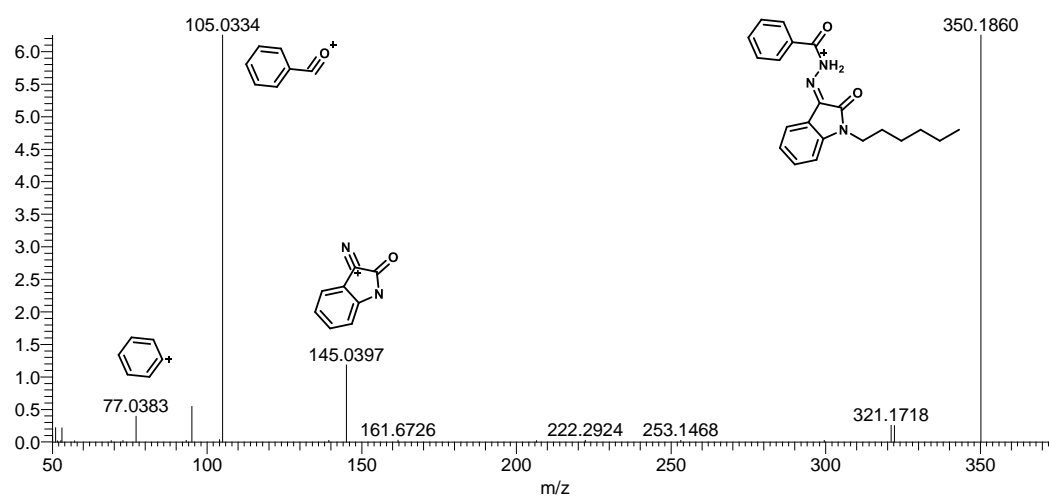

C1-3

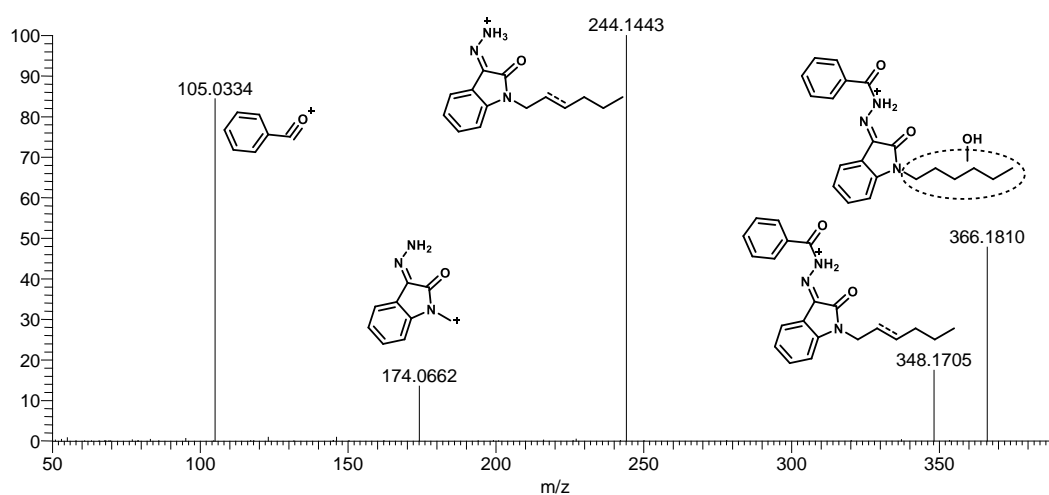

C4

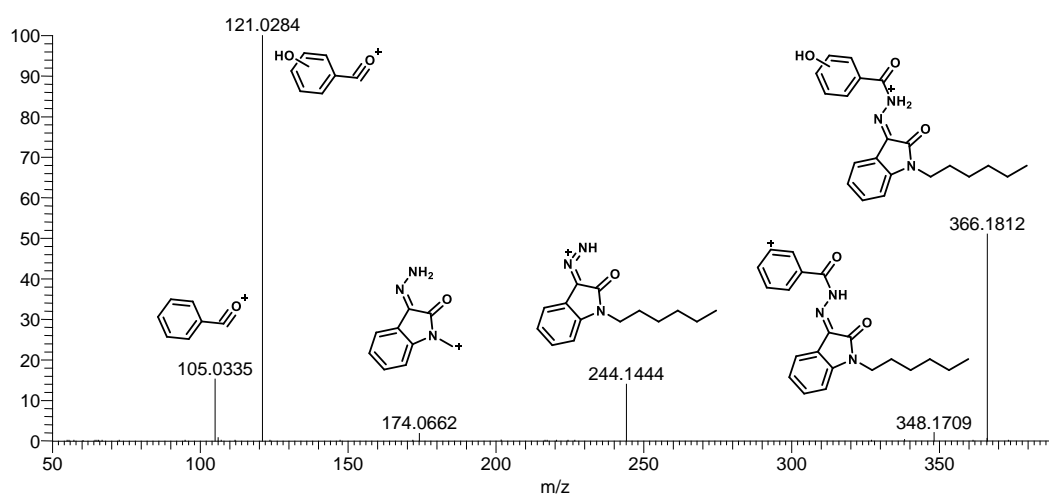

C5-7

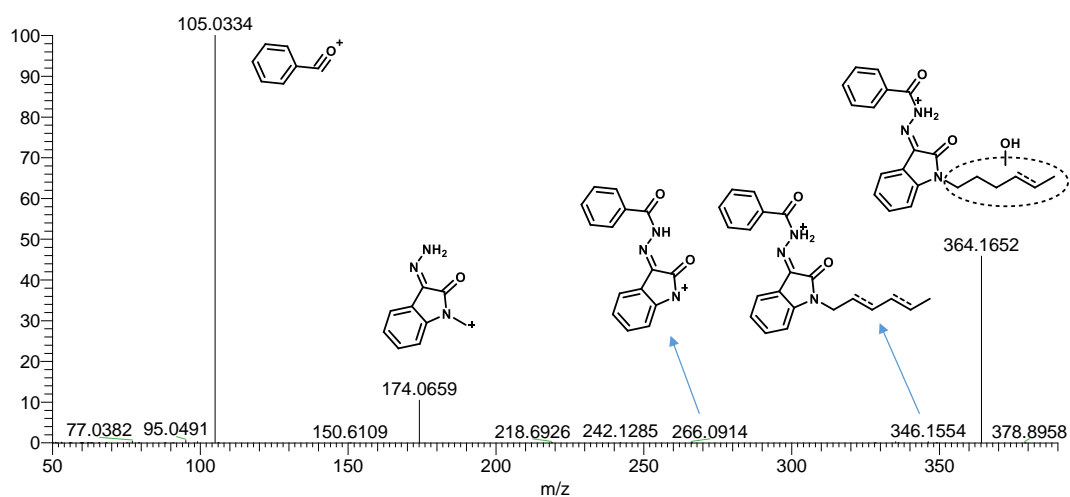

C8,9

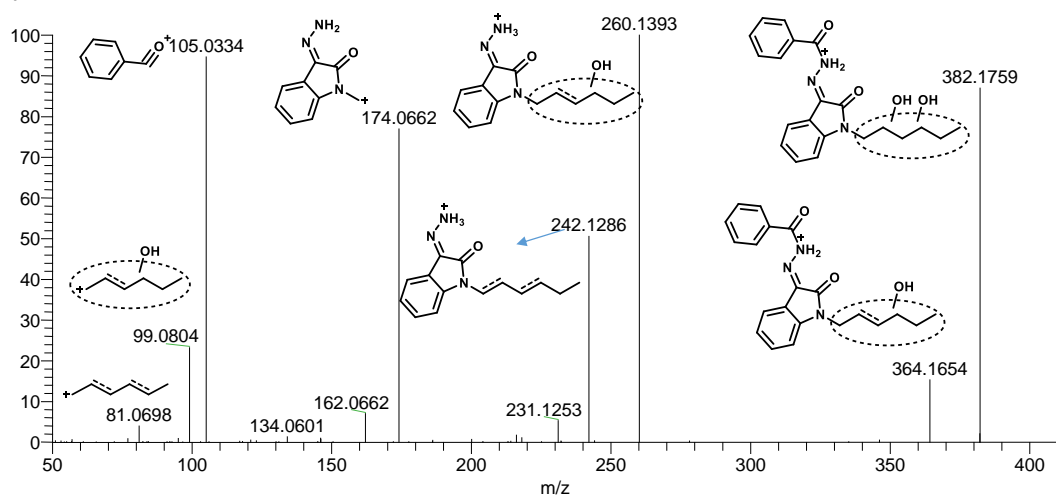

C10-12

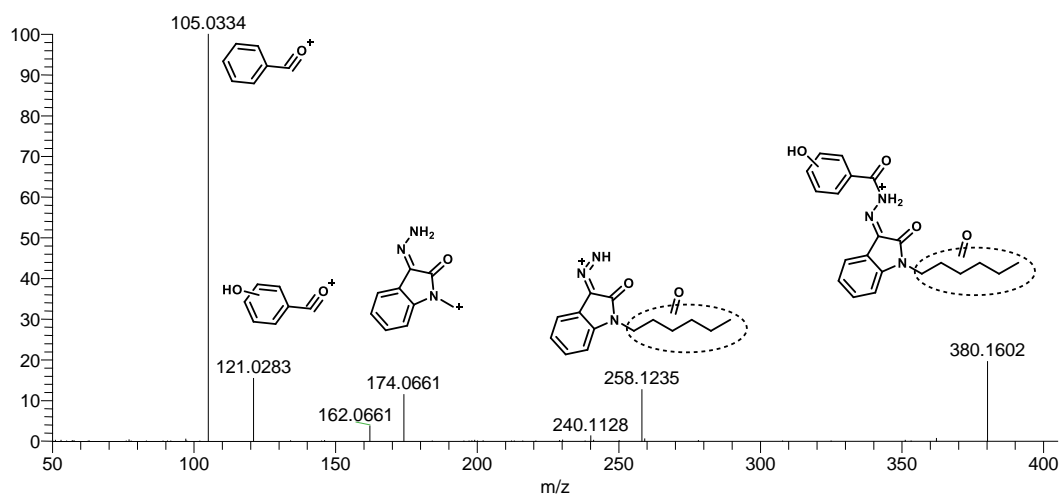

C13,14

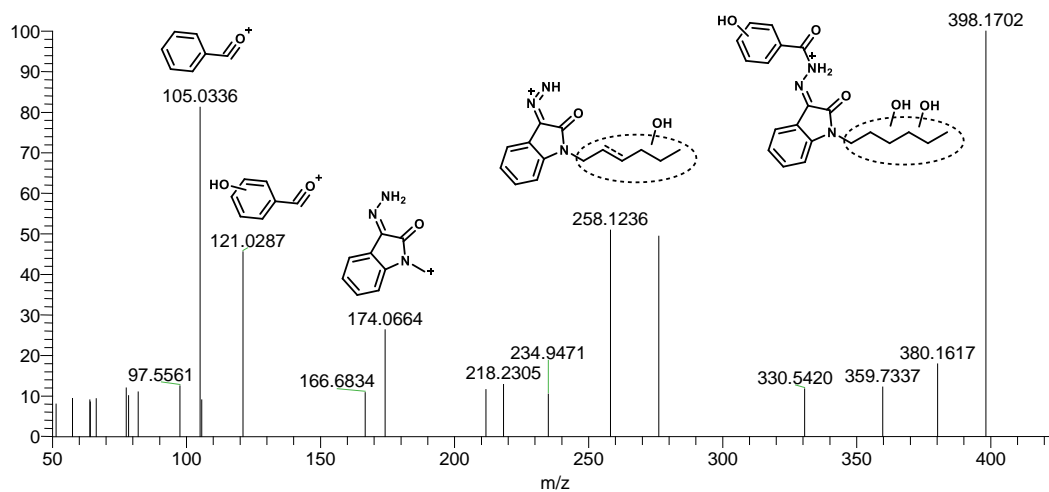

C15

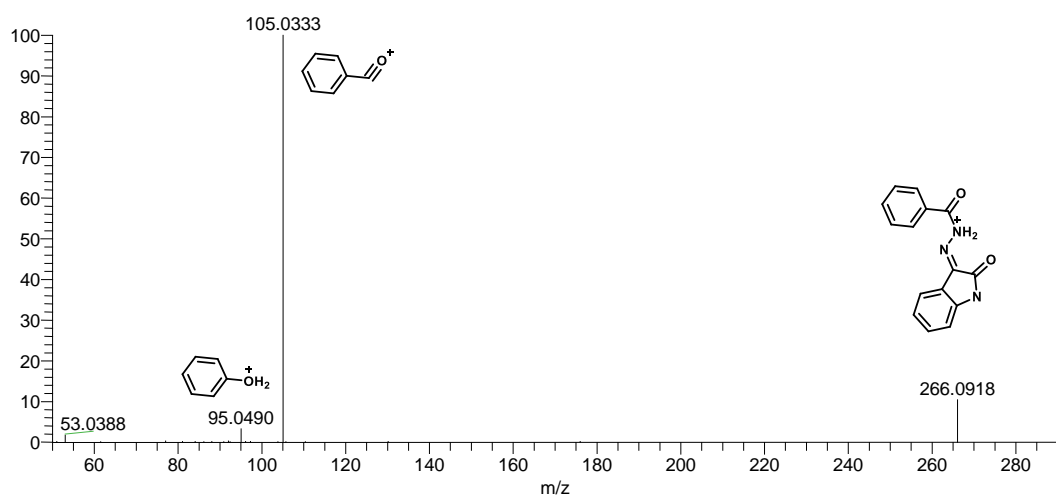

C16

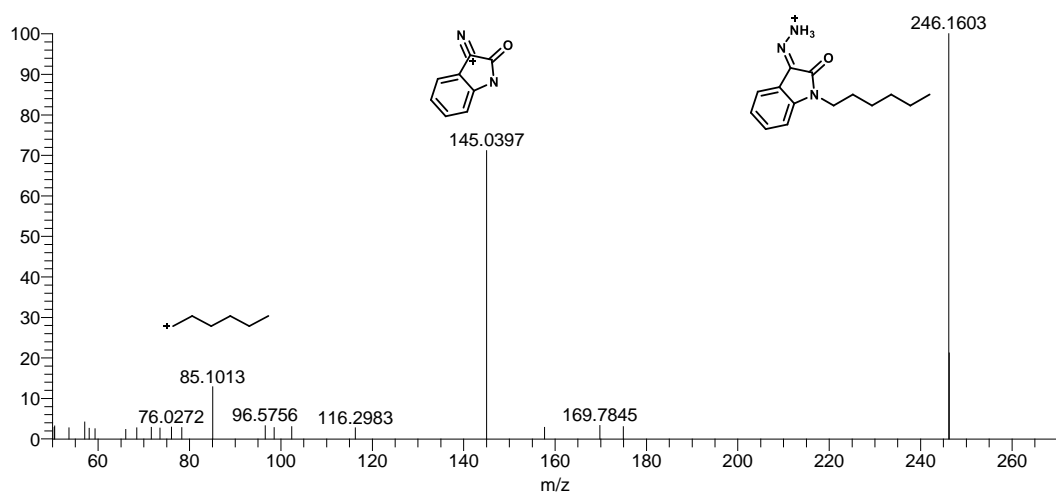

C17-20

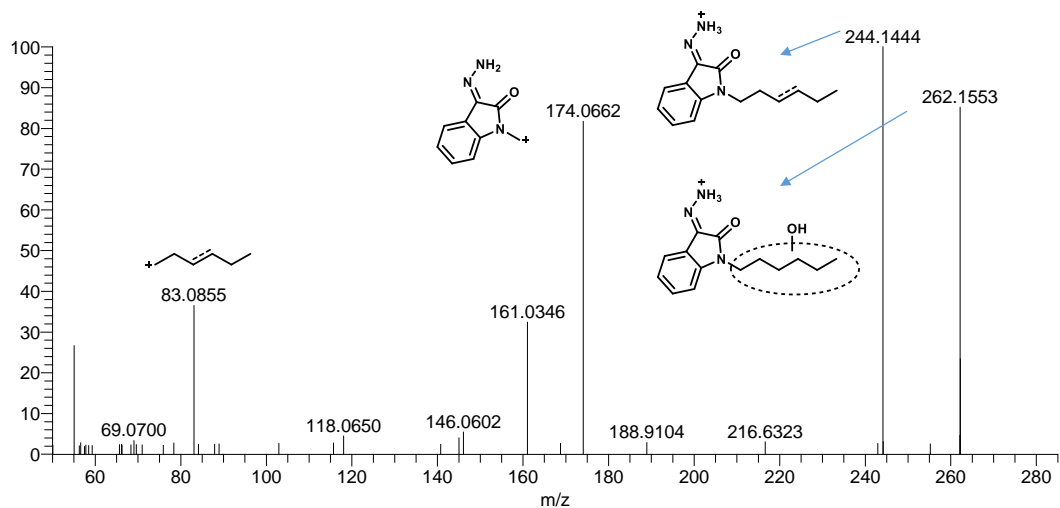

### C21,22

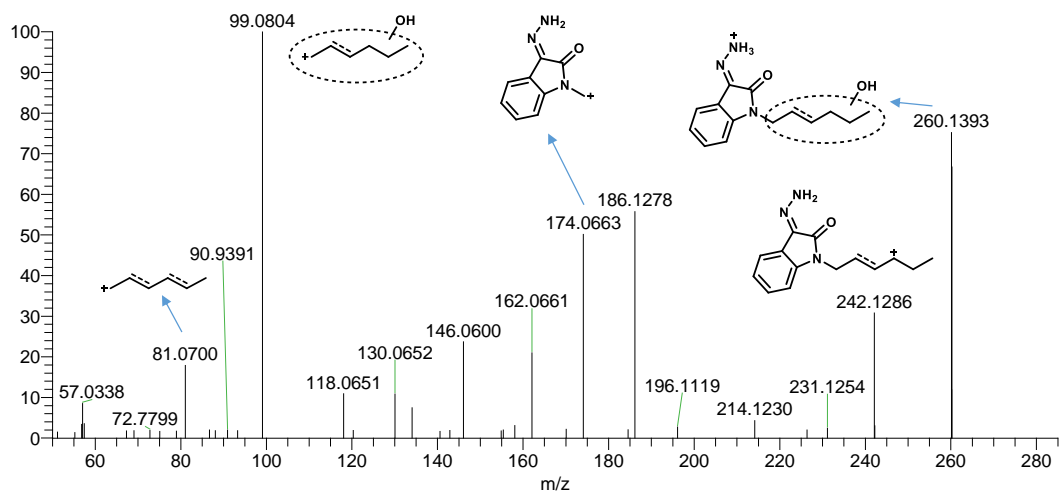

### C23

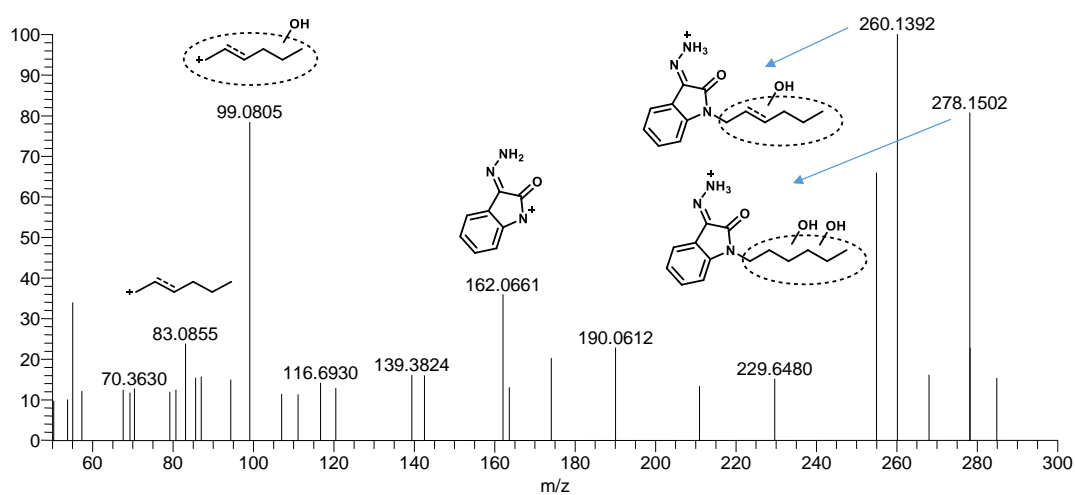

### C24-26

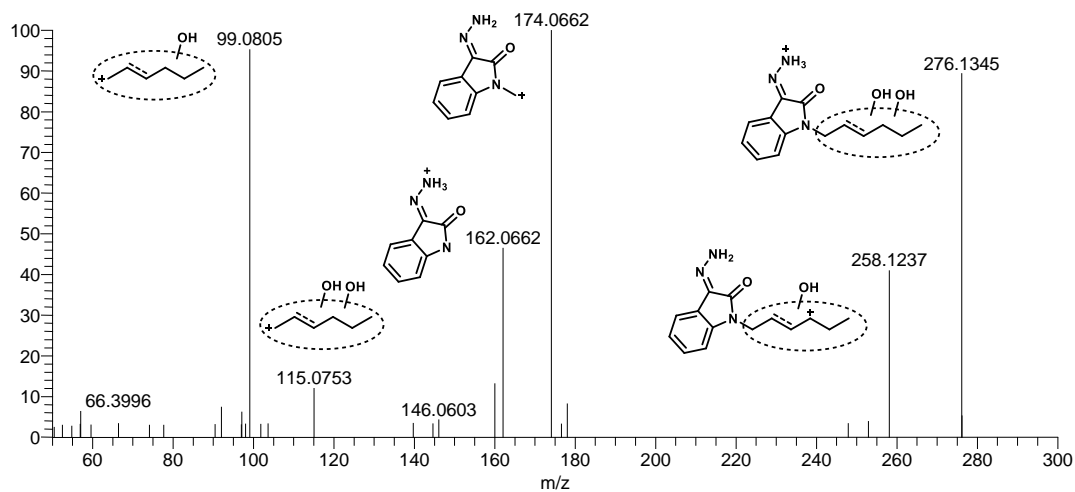

### C27-30

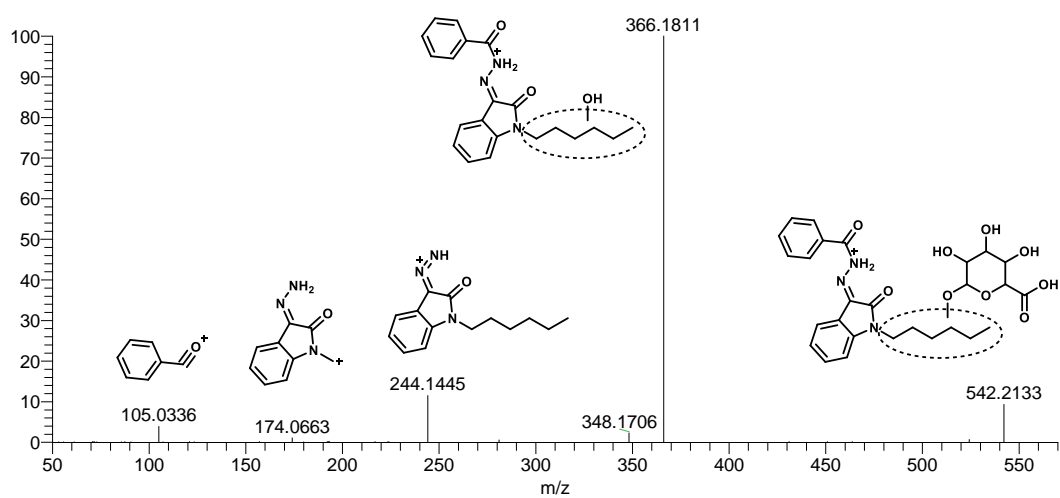

### C31

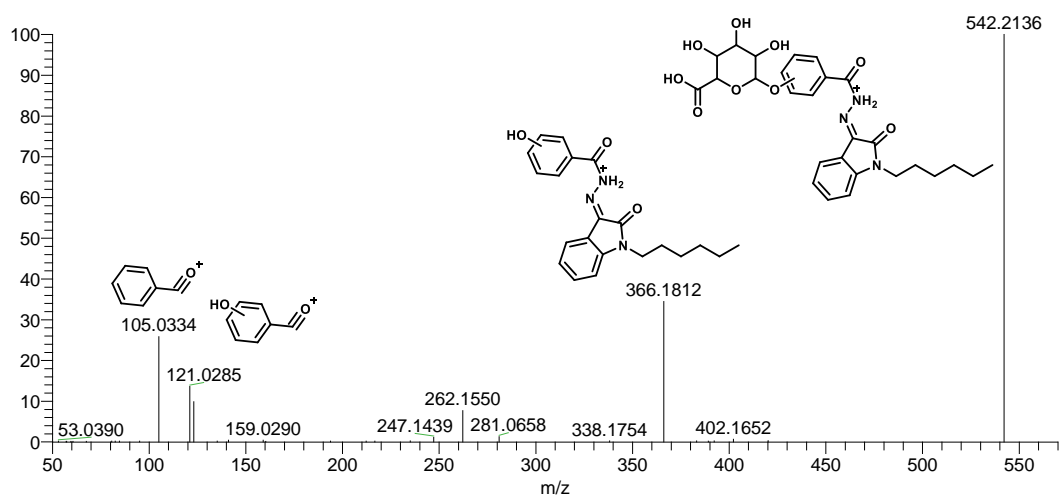

### C32

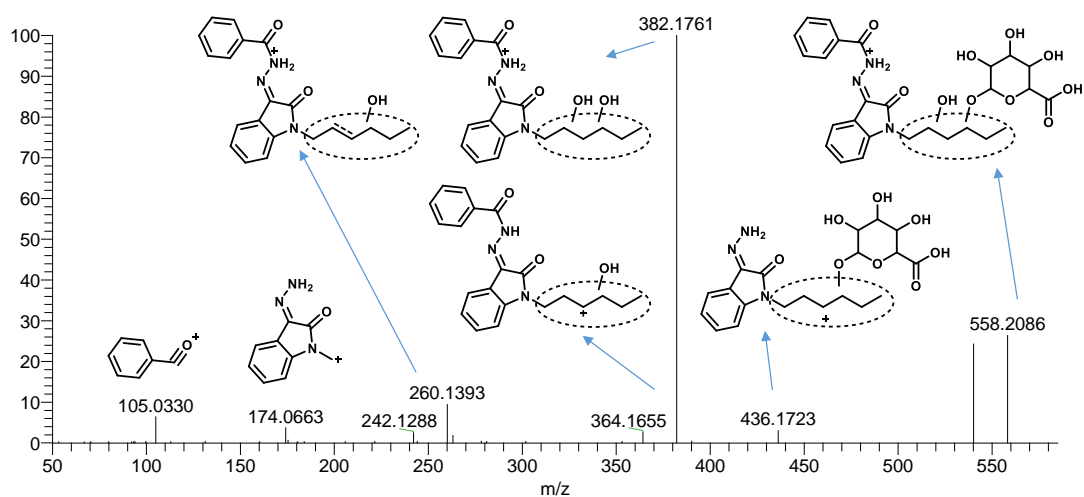

### C33

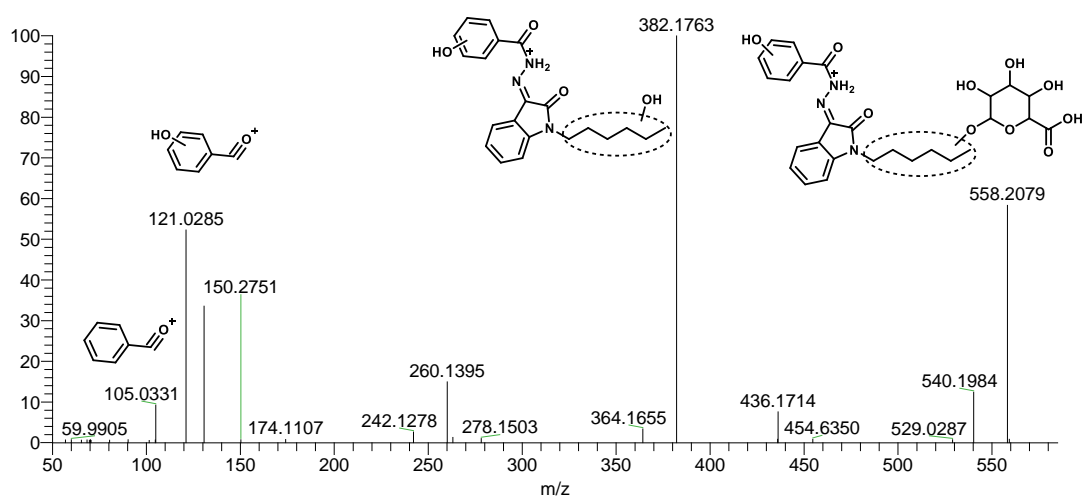

### C34

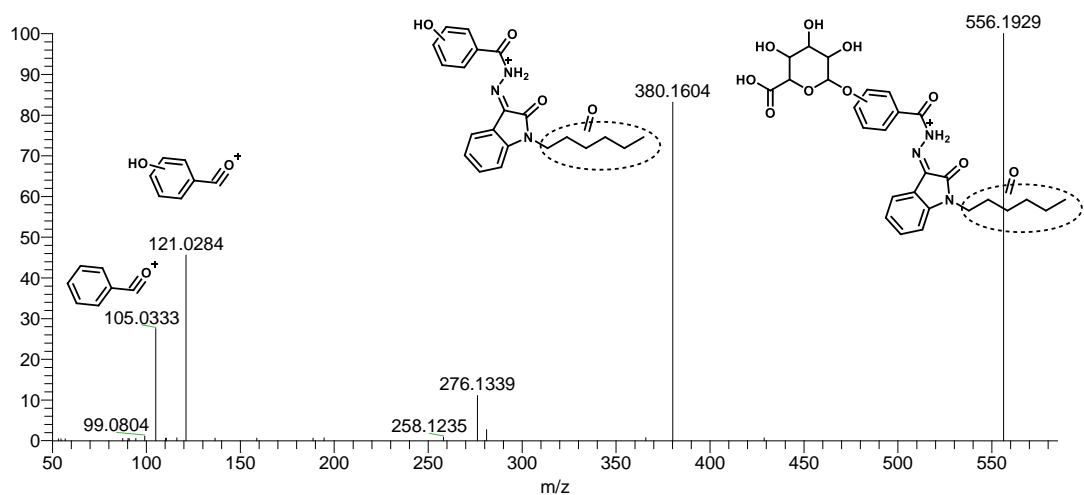



Figure S10. Mass spectrometry spectra and fragmentation of BZO-POXIZID and its metabolites.

D0

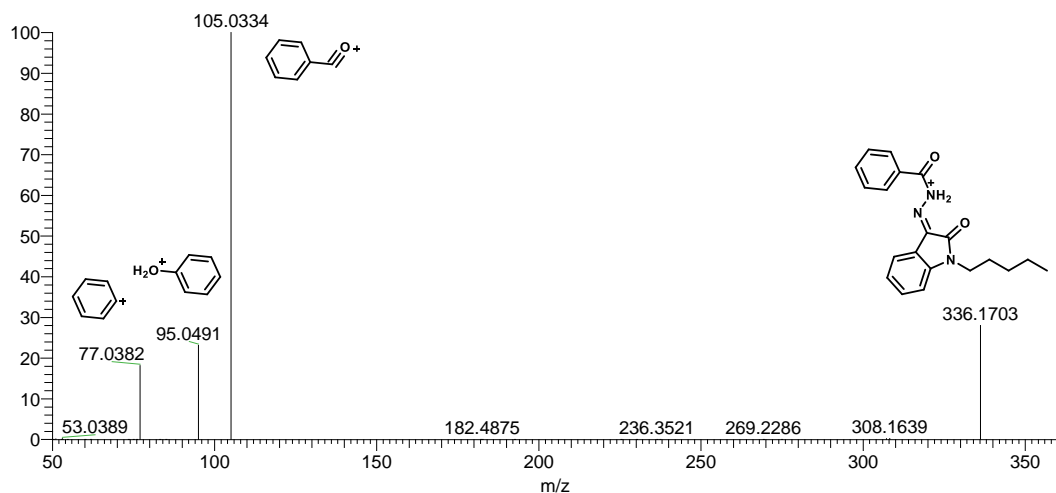

D1,2

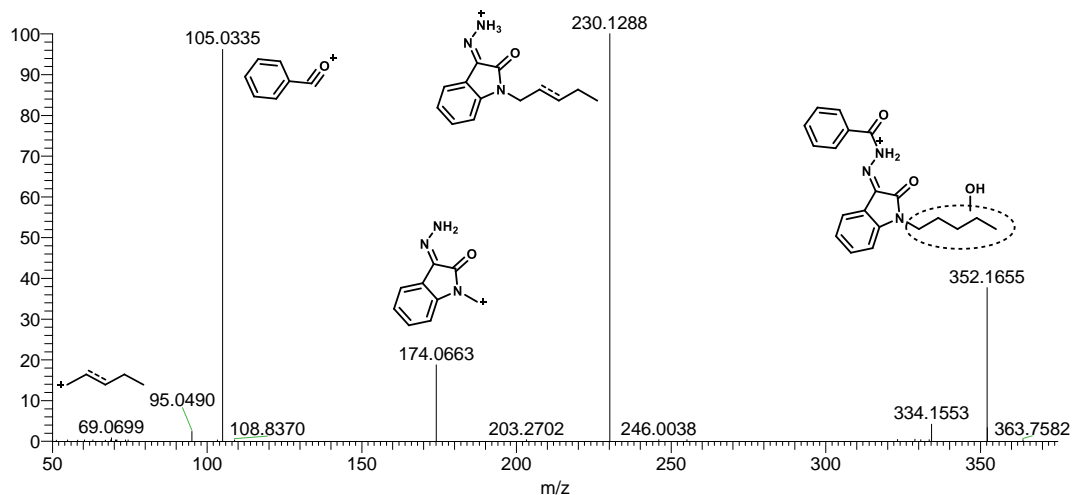

D3,4

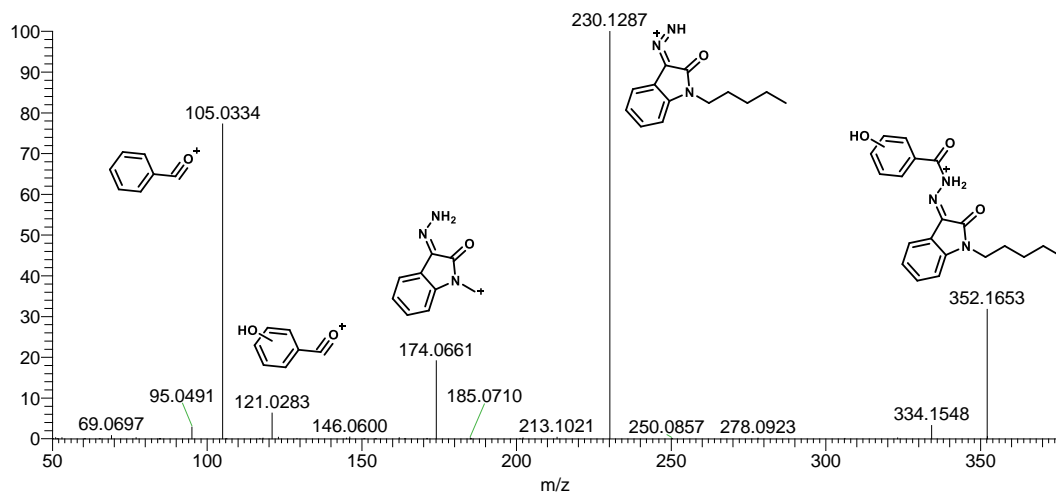

D5,6

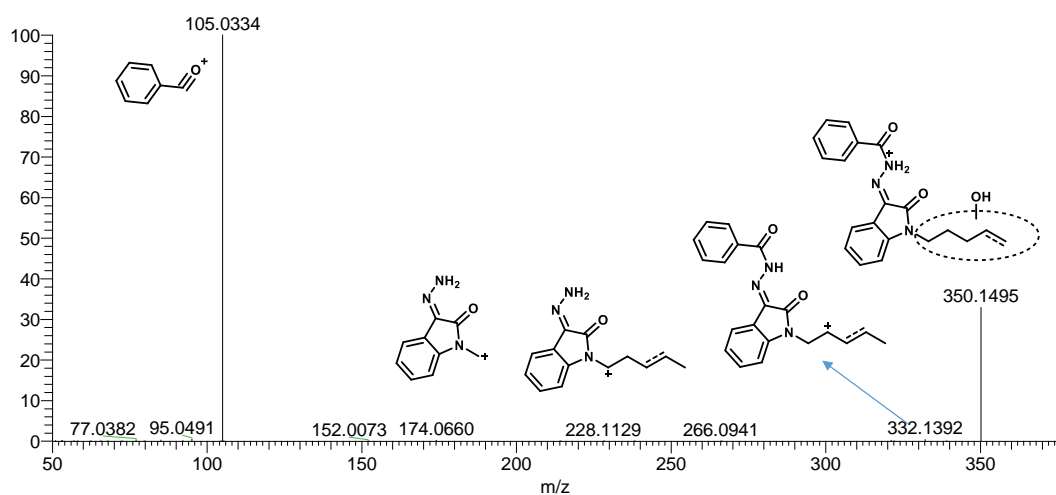

D7,8

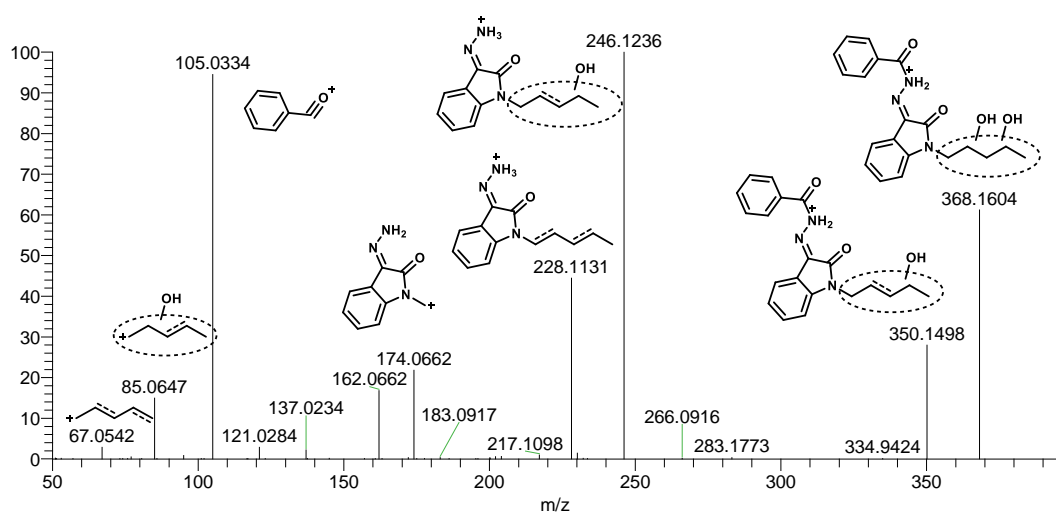

D9-11

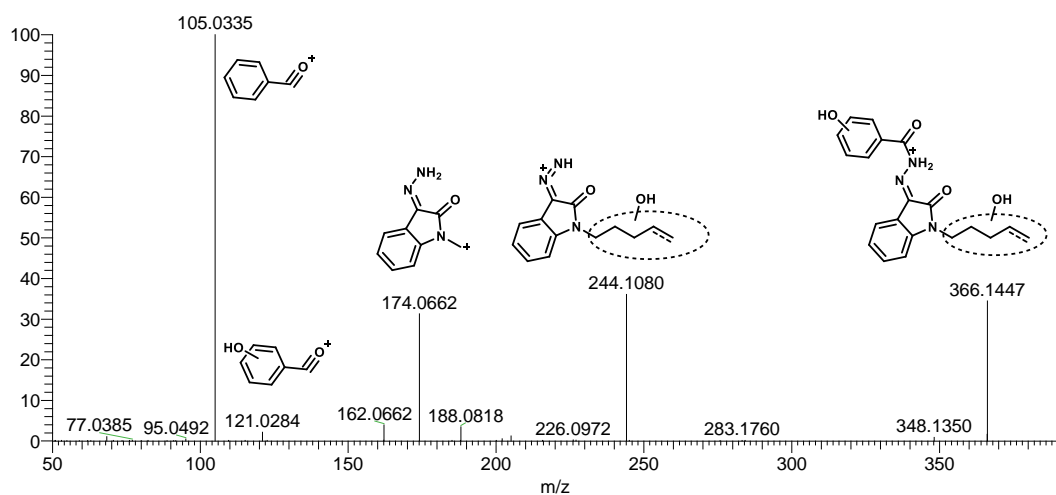

D12

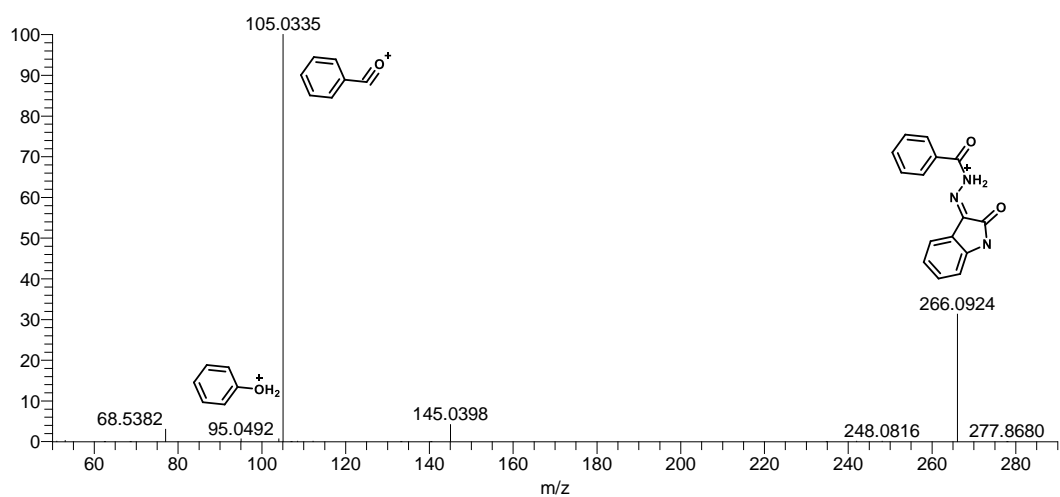

### D13-15

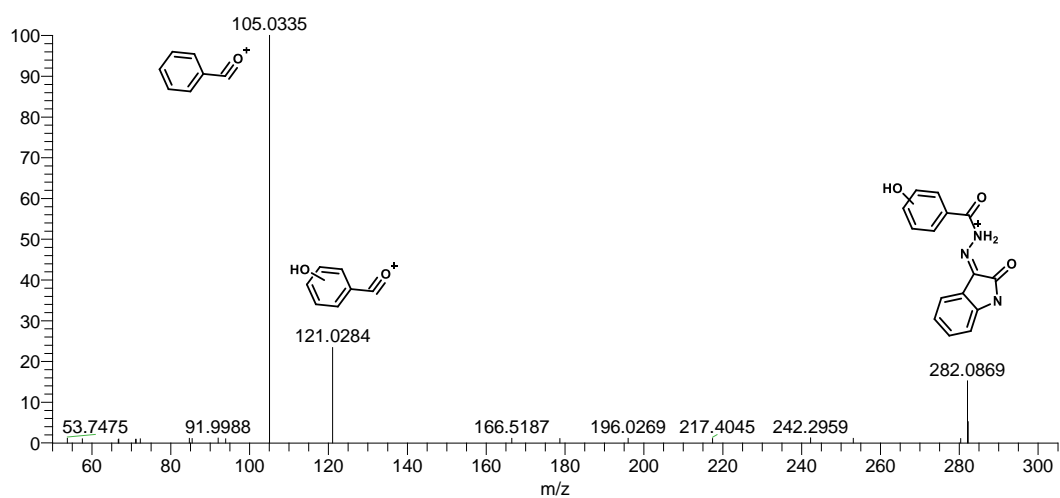

### D16

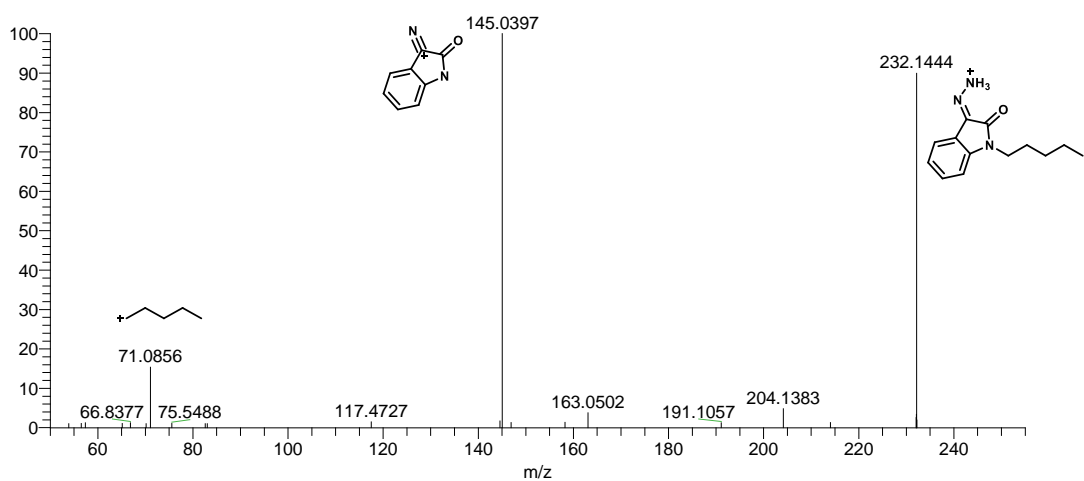

### D17-20

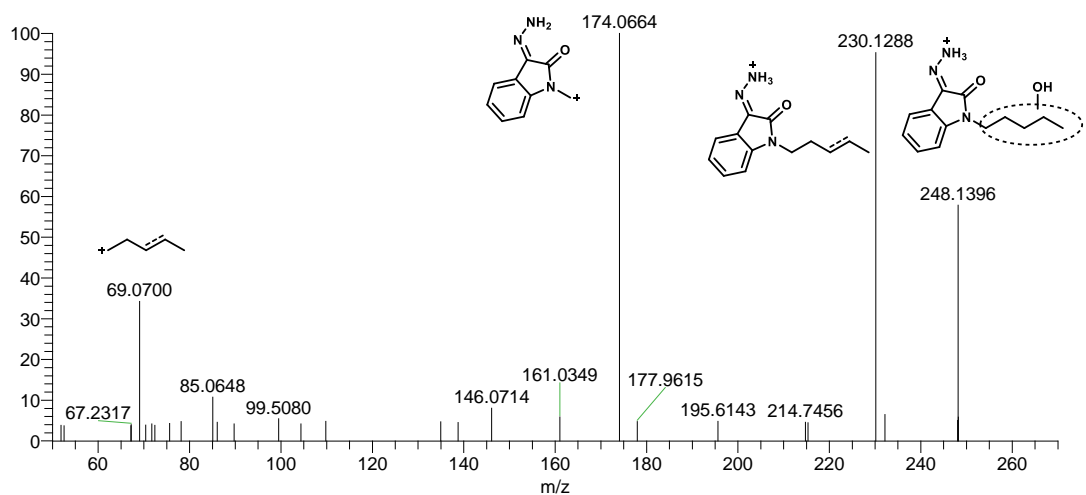

D21-25

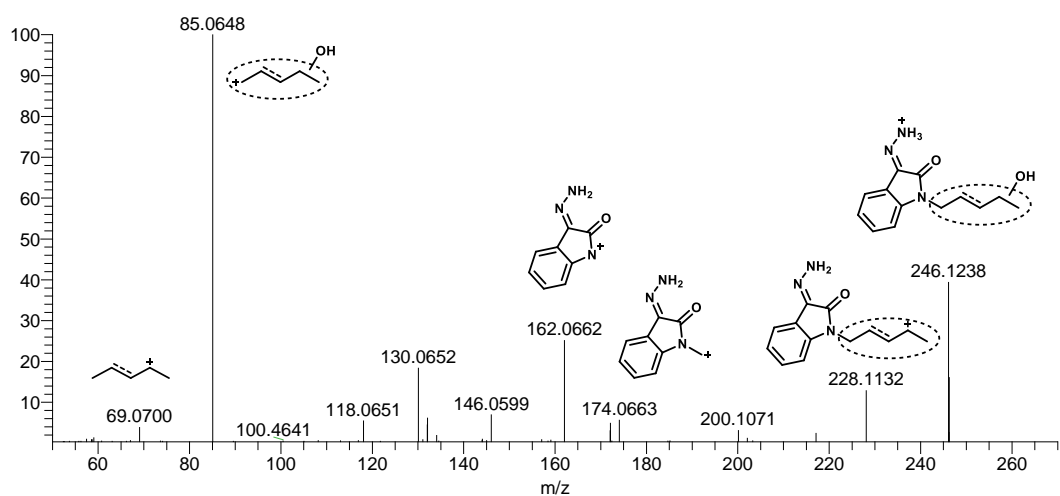

D26

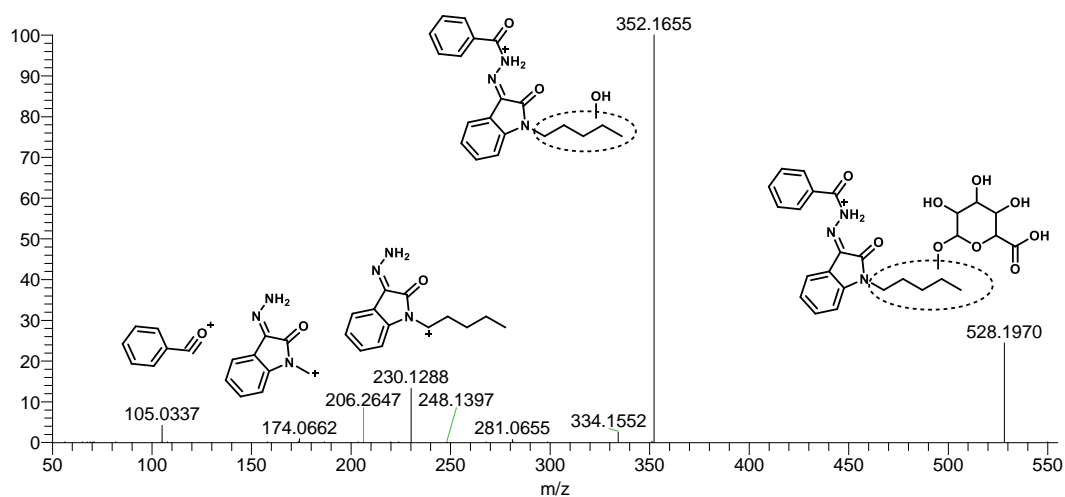

D27,28

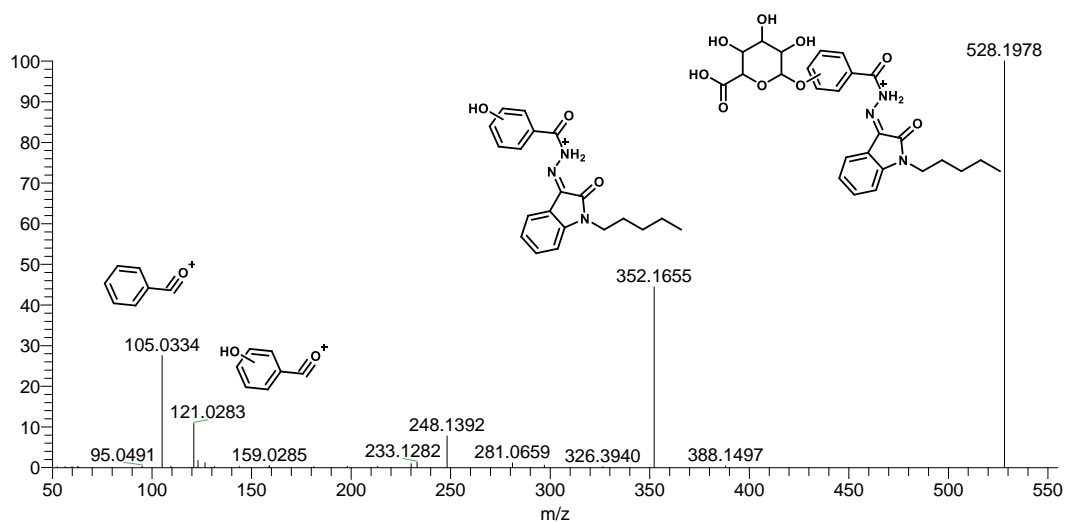

D29,30

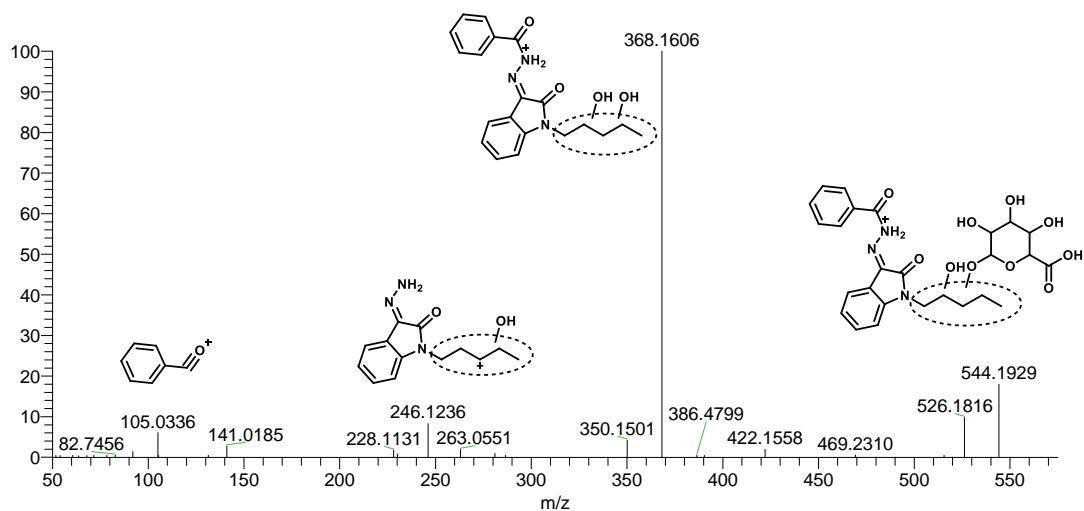

Figure S11. Mass spectrometry spectra and fragmentation of BZO-4en-POXIZID and its metabolites.

E0

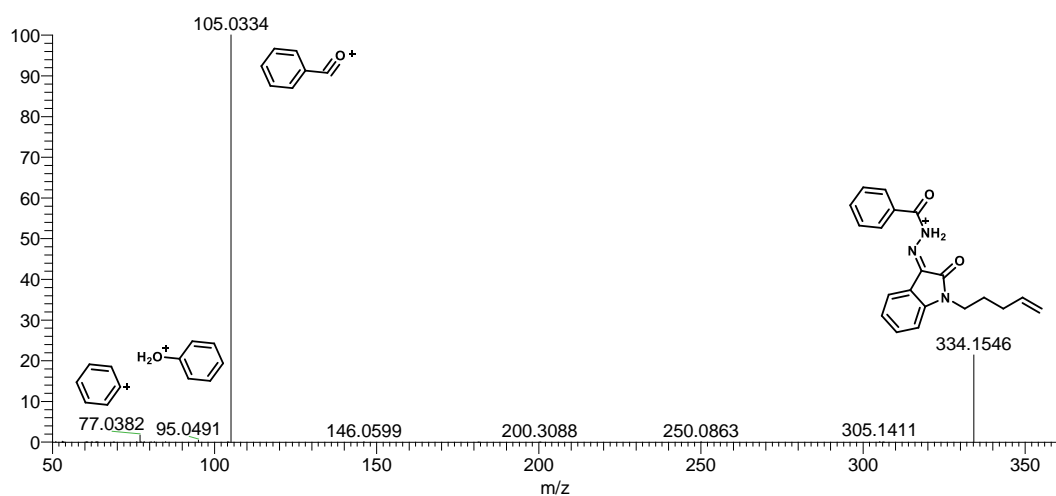

E1,2,3

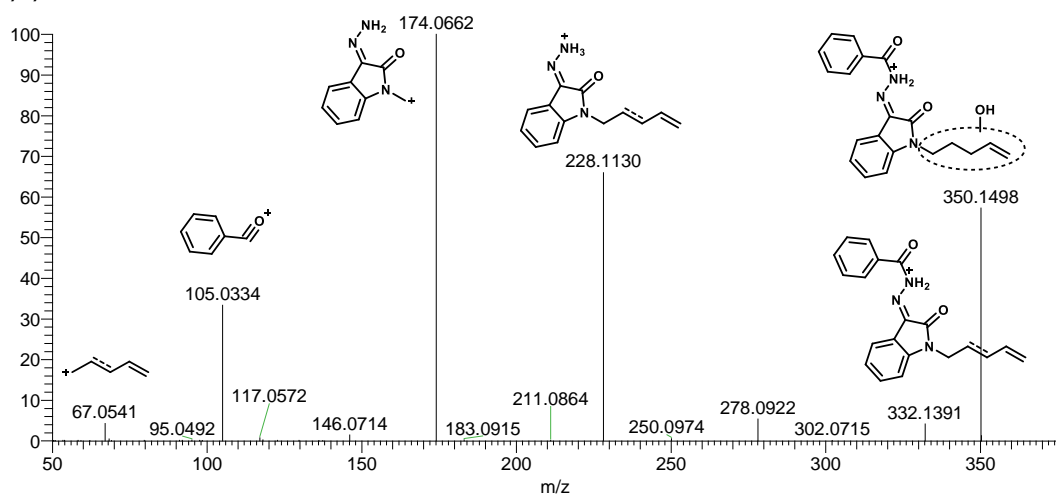

E4

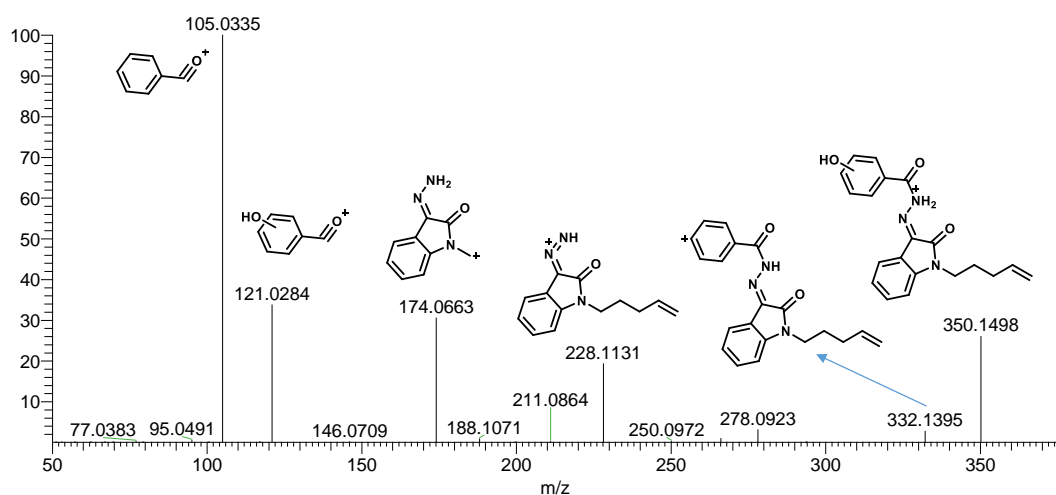

E5,6

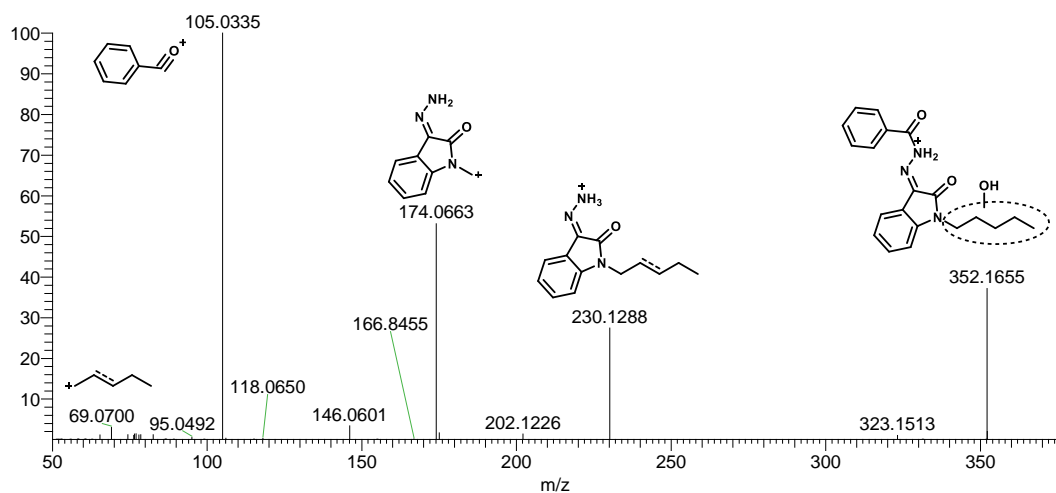

E7

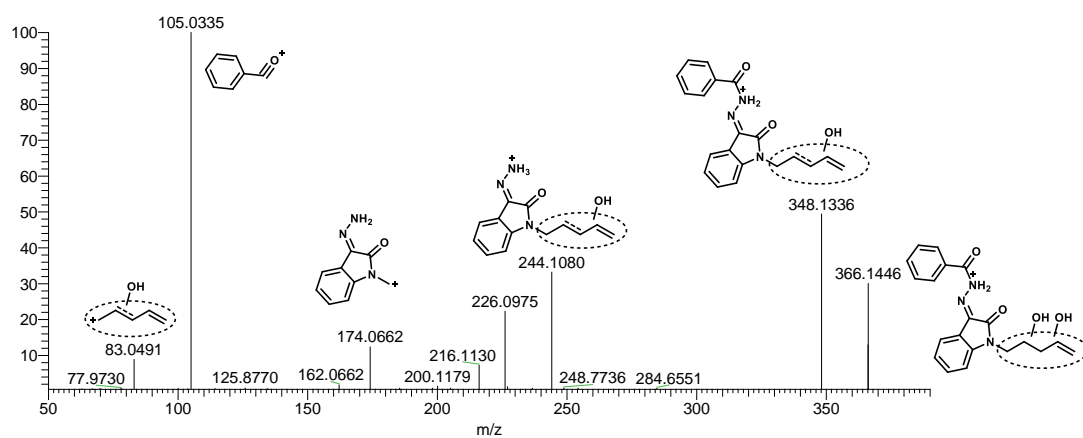

E8

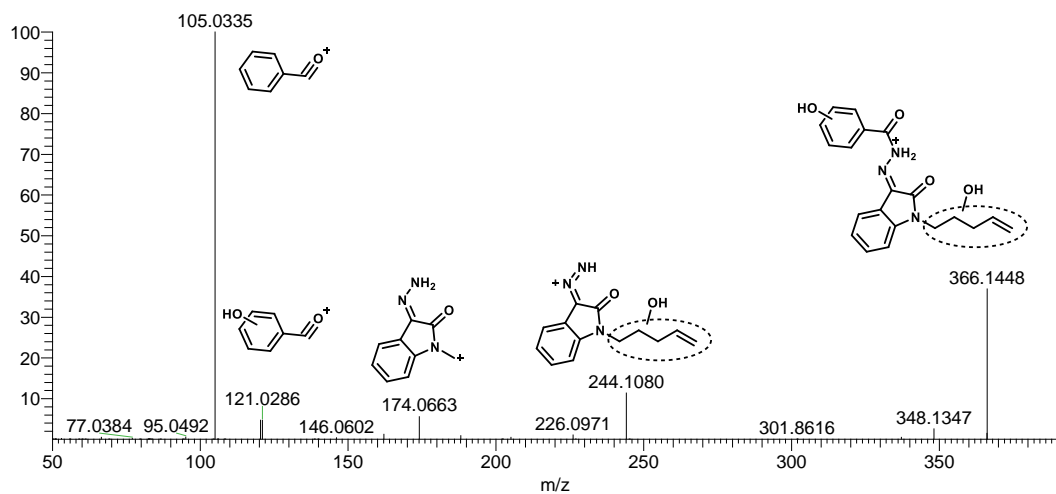

E9

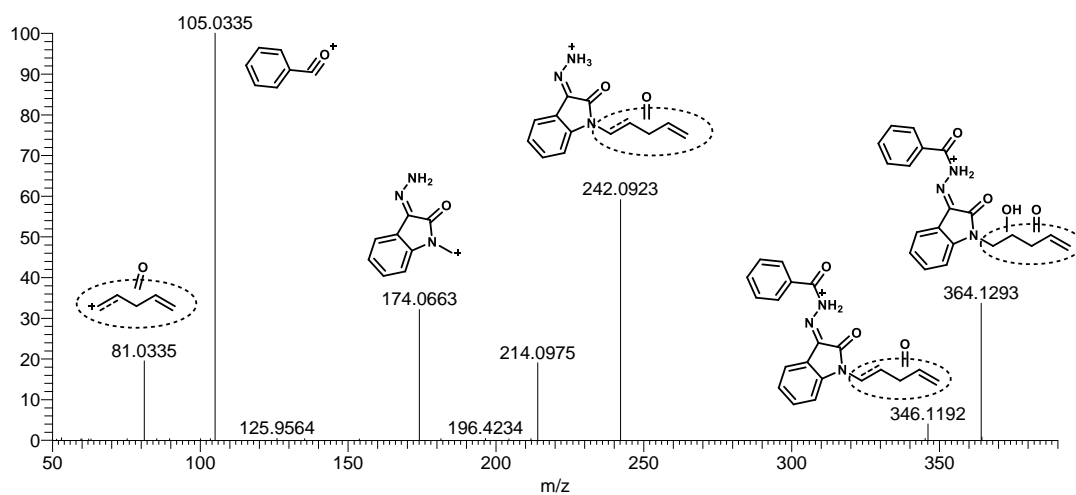

E10

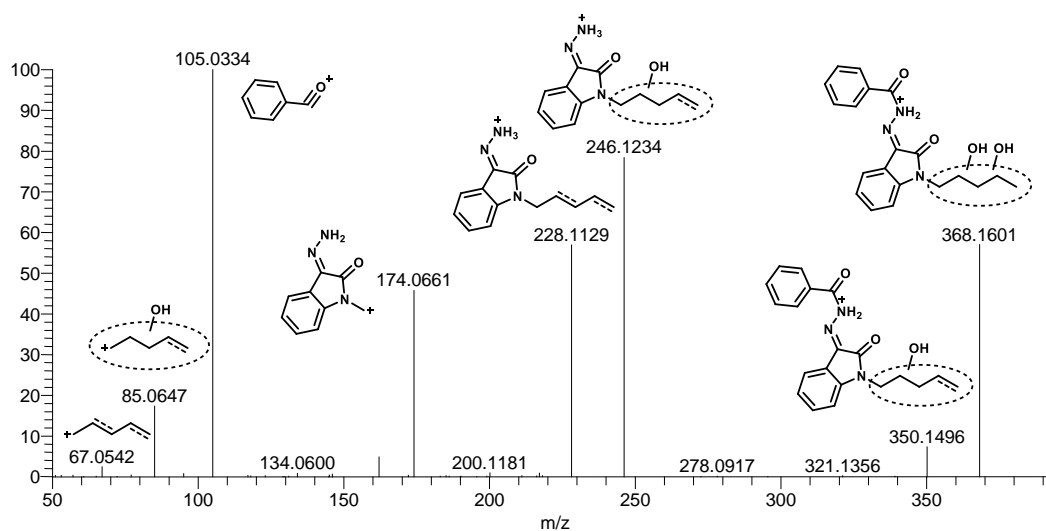

E11

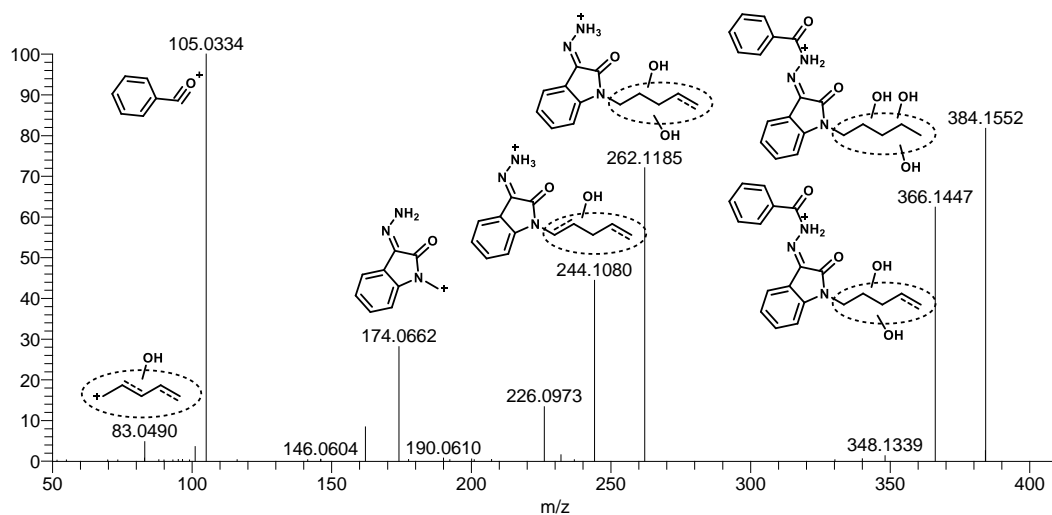

E12



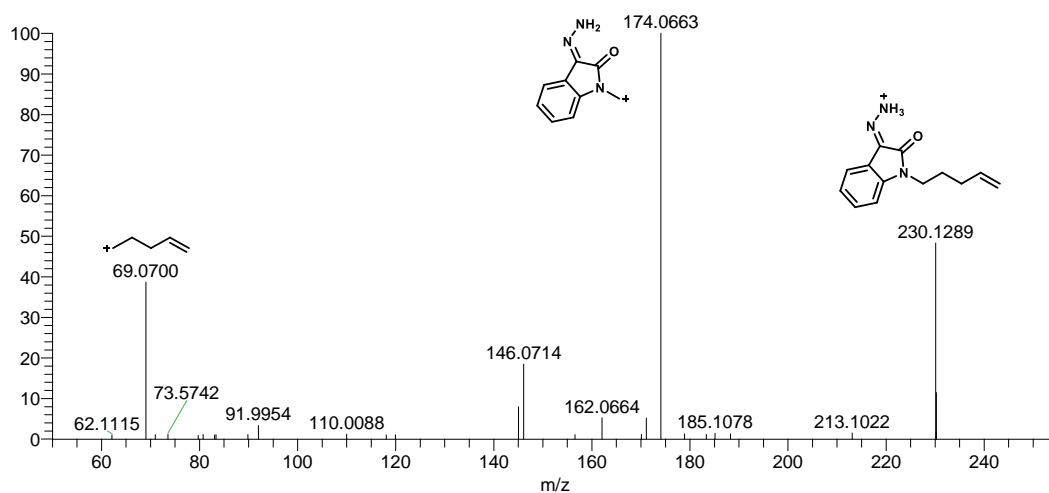

E13

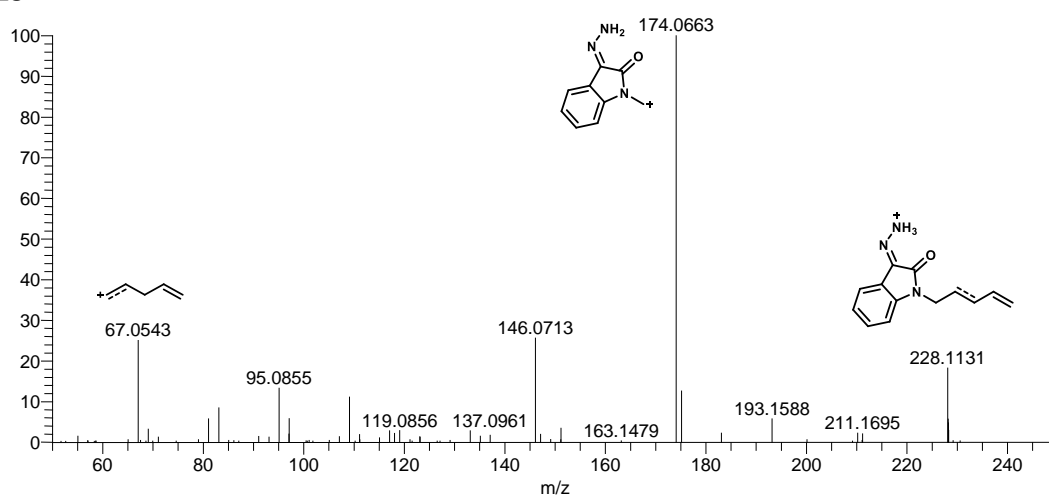

E14-16

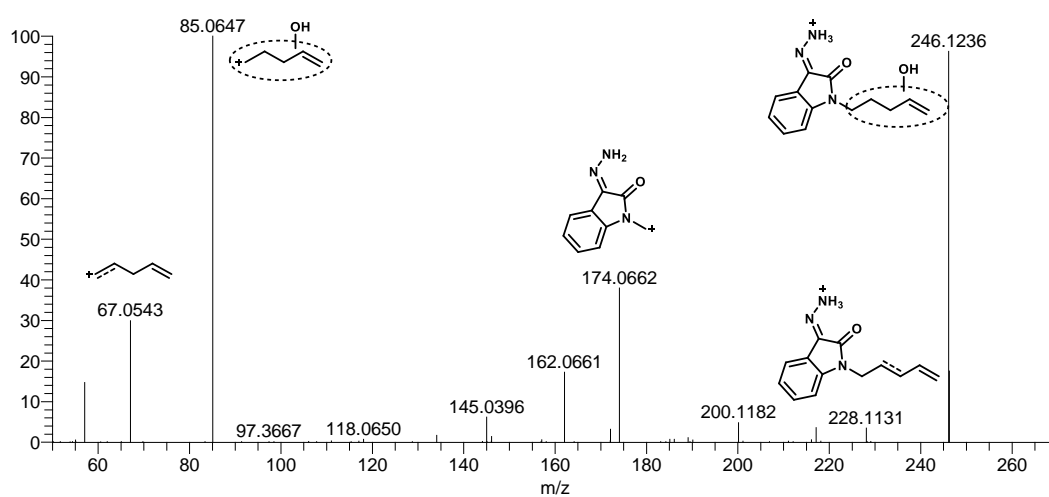

E17-19

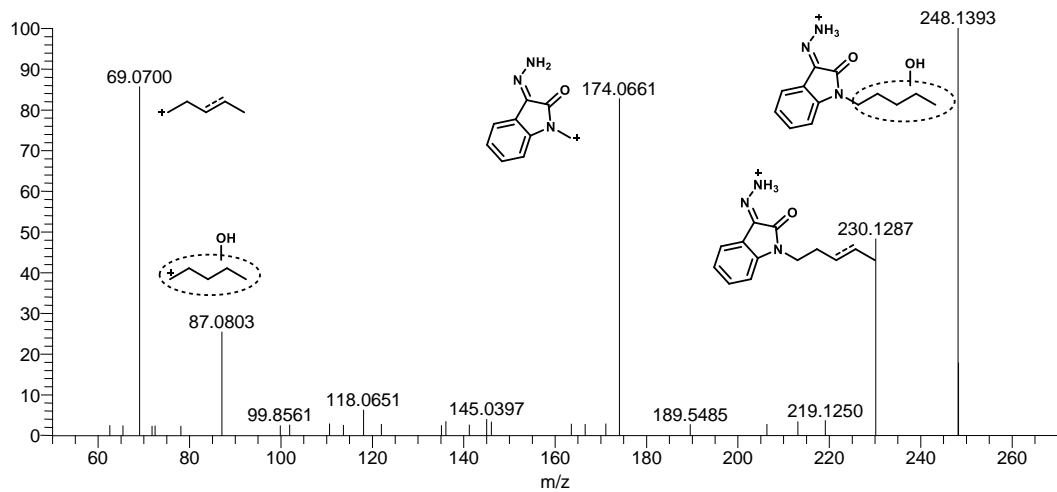

E20,21

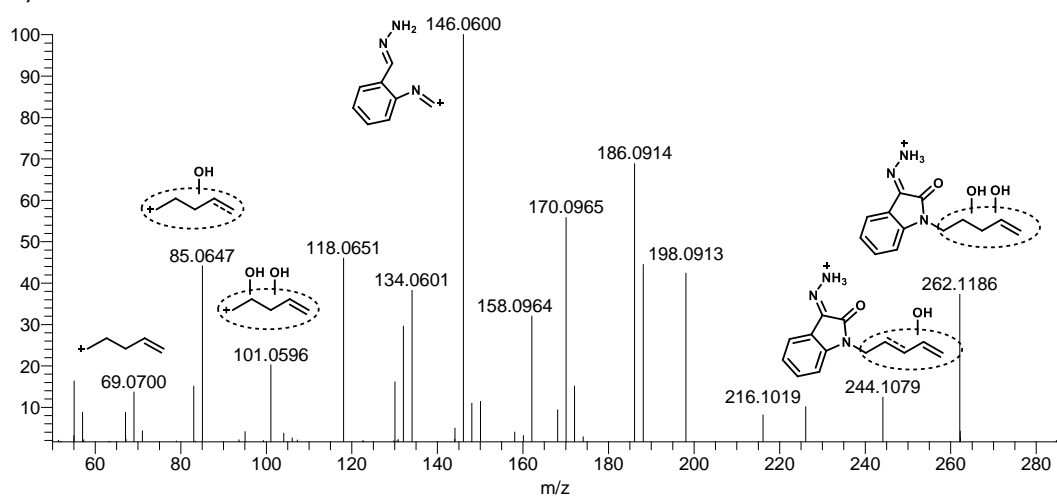

E22,23

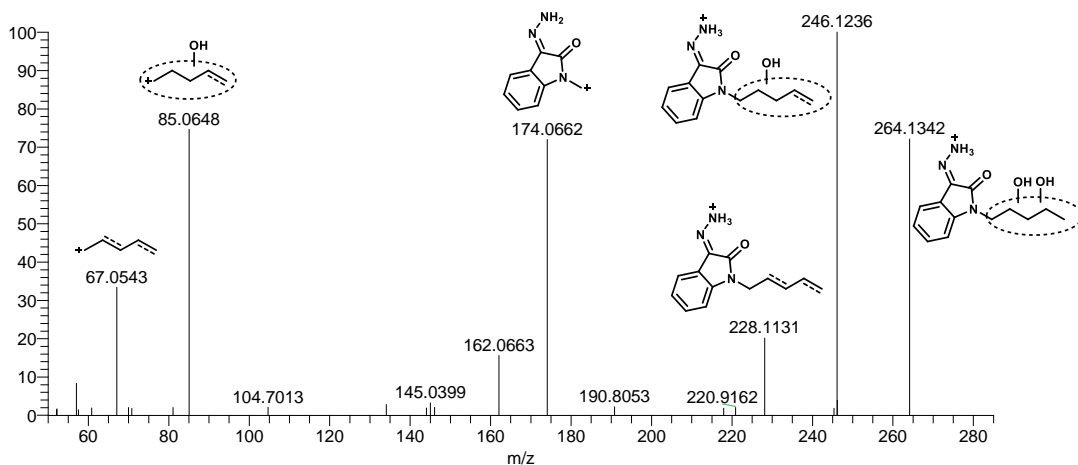

E24

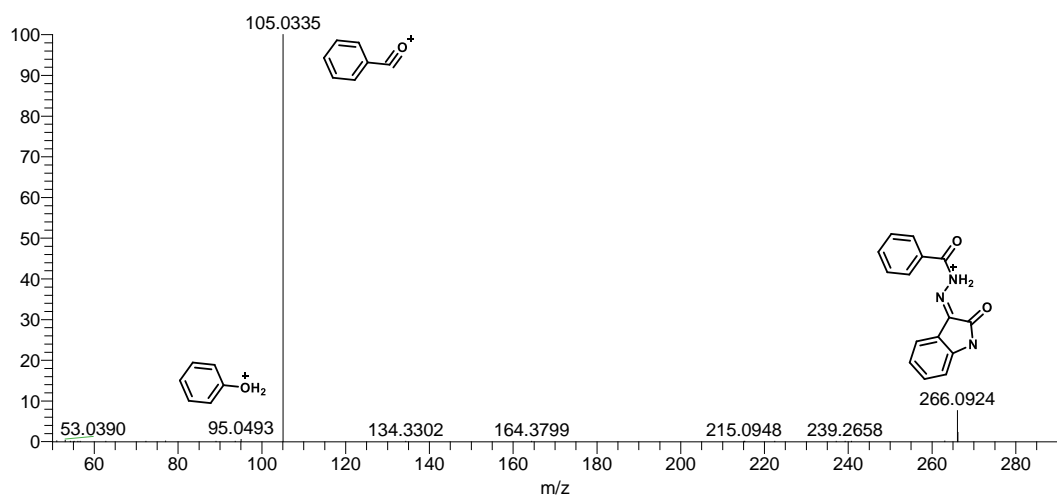

E25

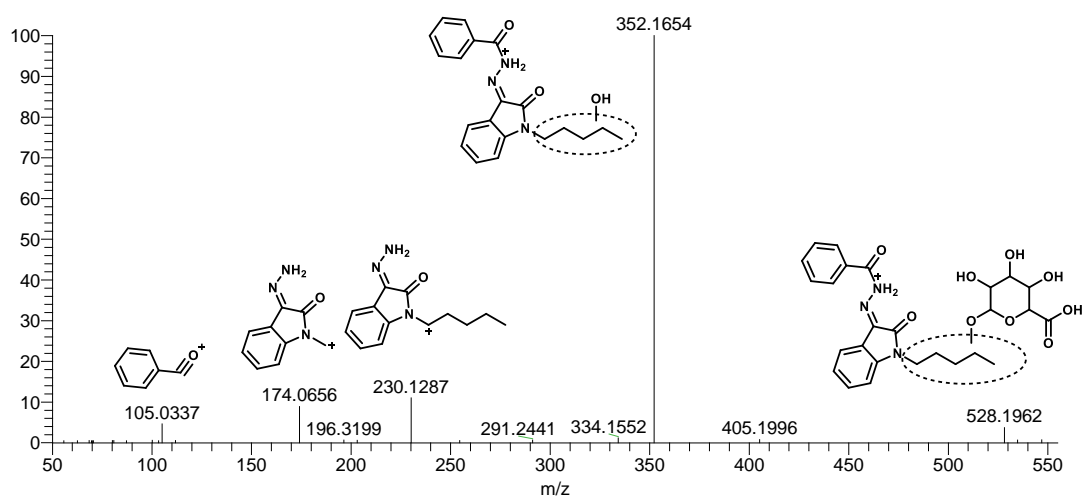

E26

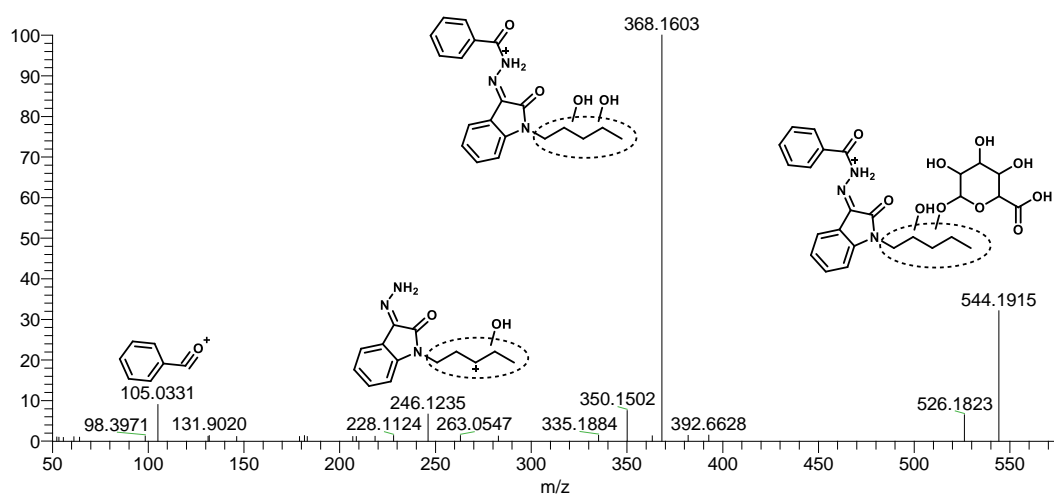

Figure S12. Mass spectrometry spectra and fragmentation of 5F-BZO-POXIZID and its metabolites.

F0

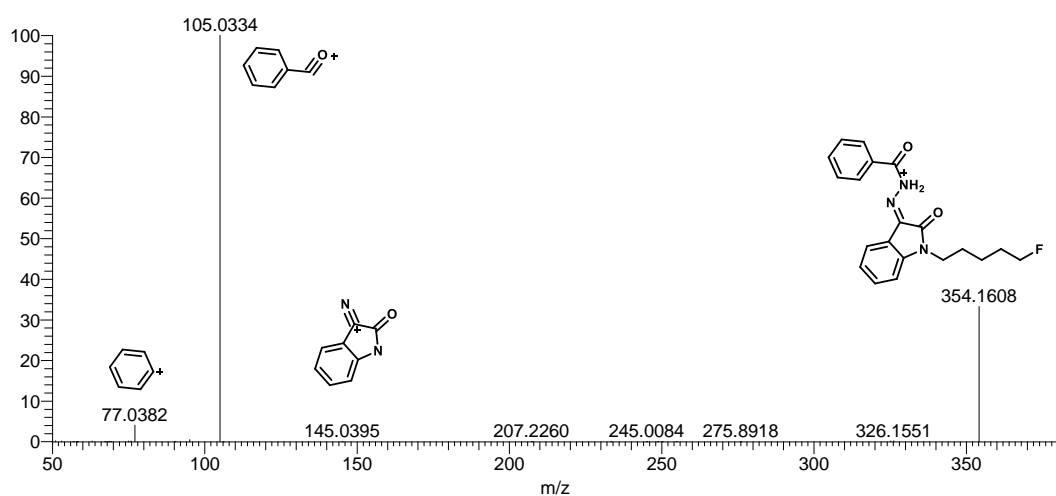

F1,2

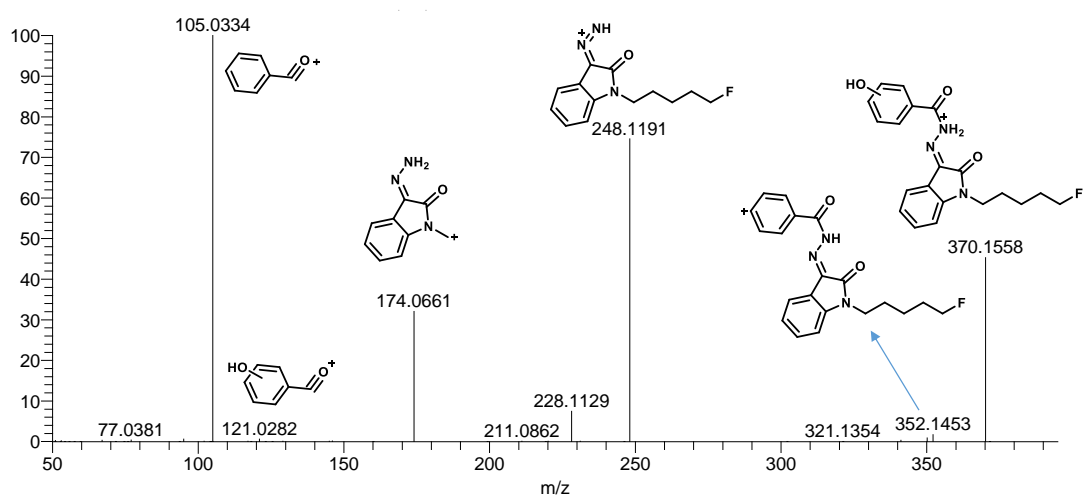

F3-5

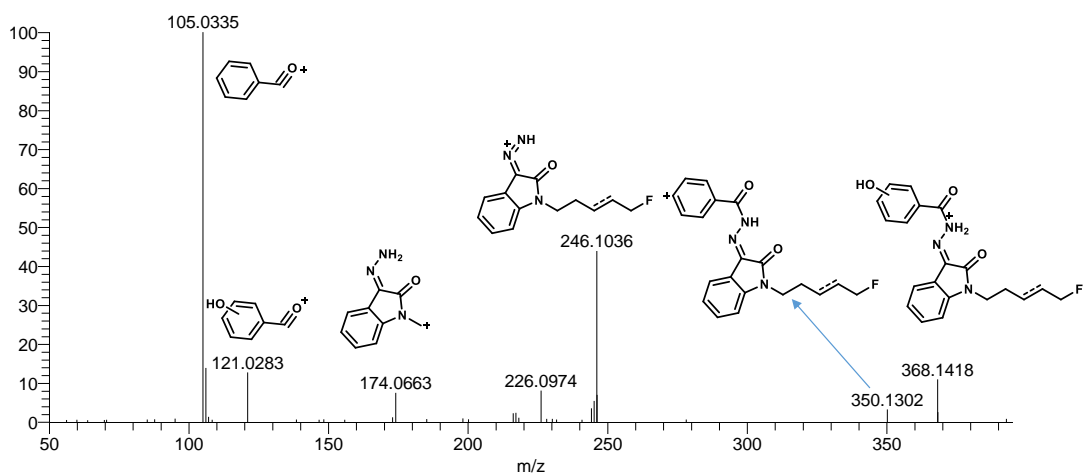

F6,7

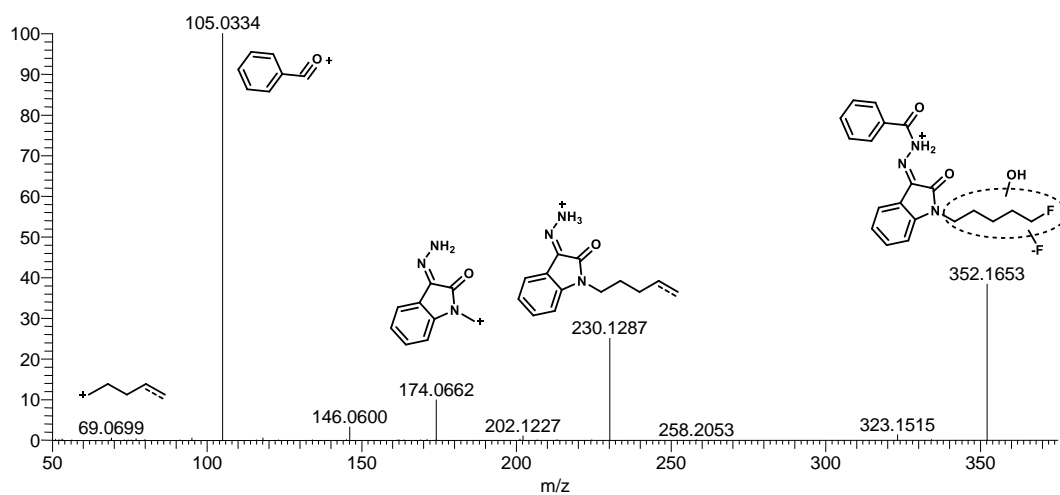

F8-10

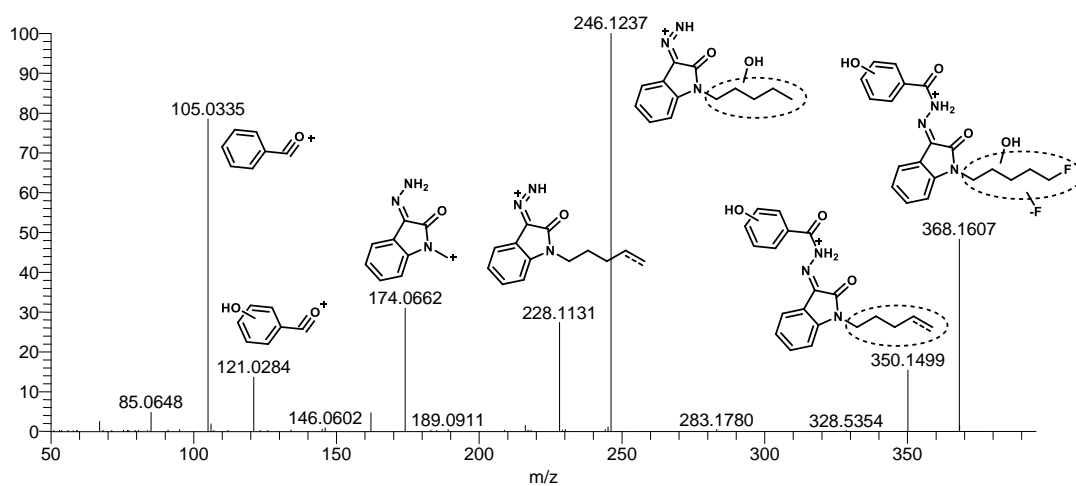

F11

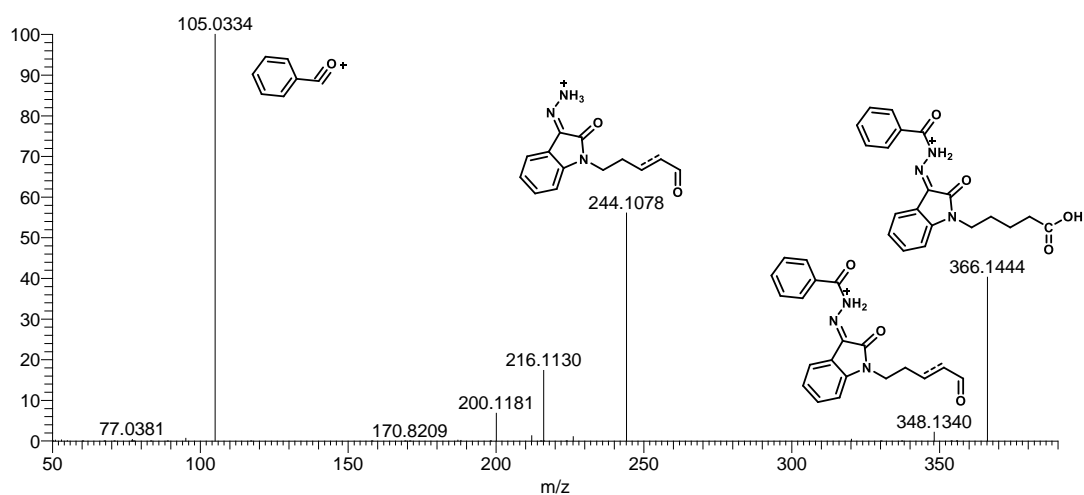

F12

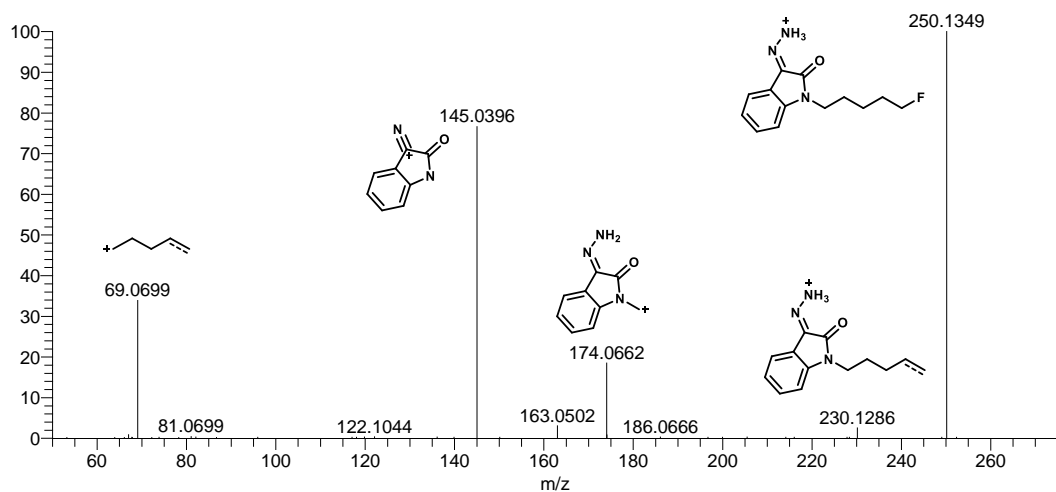

F13-15

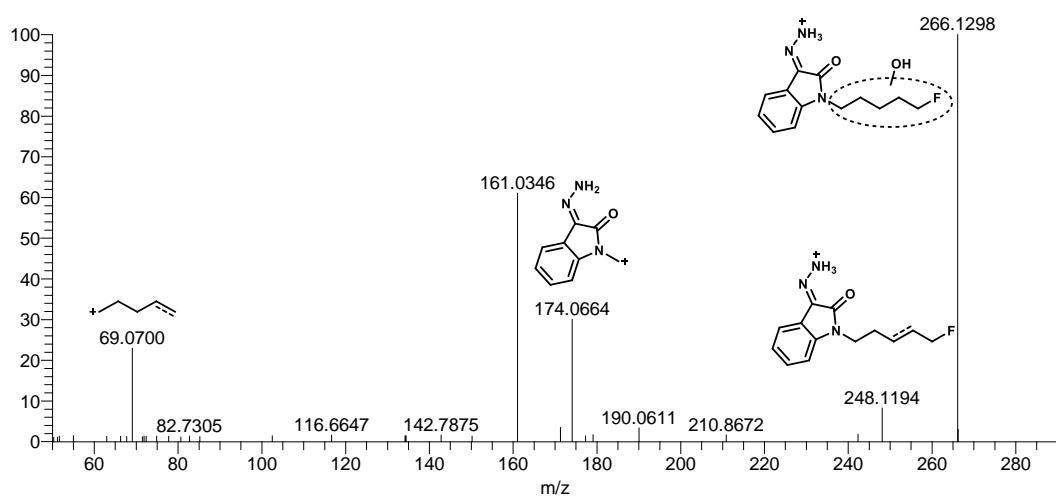

F16

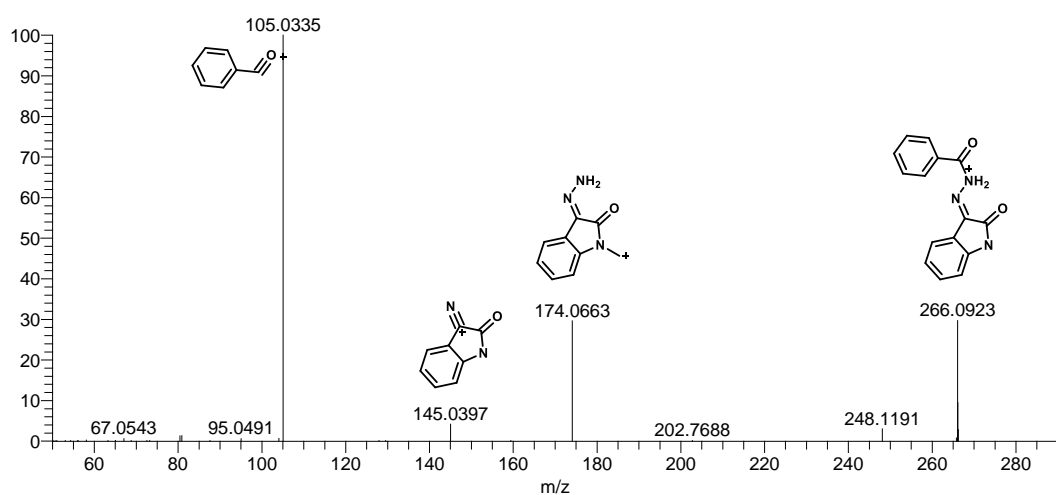

F17-19

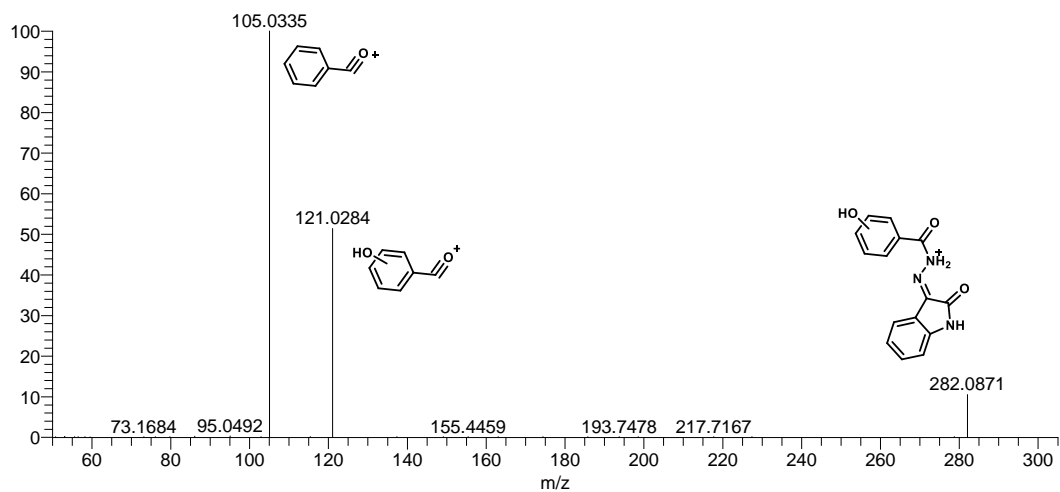

F20

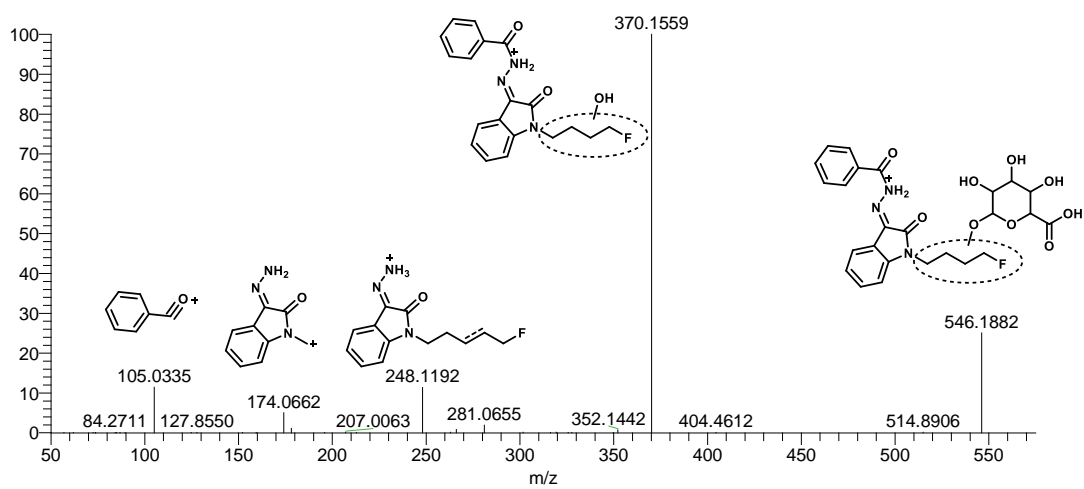

F21

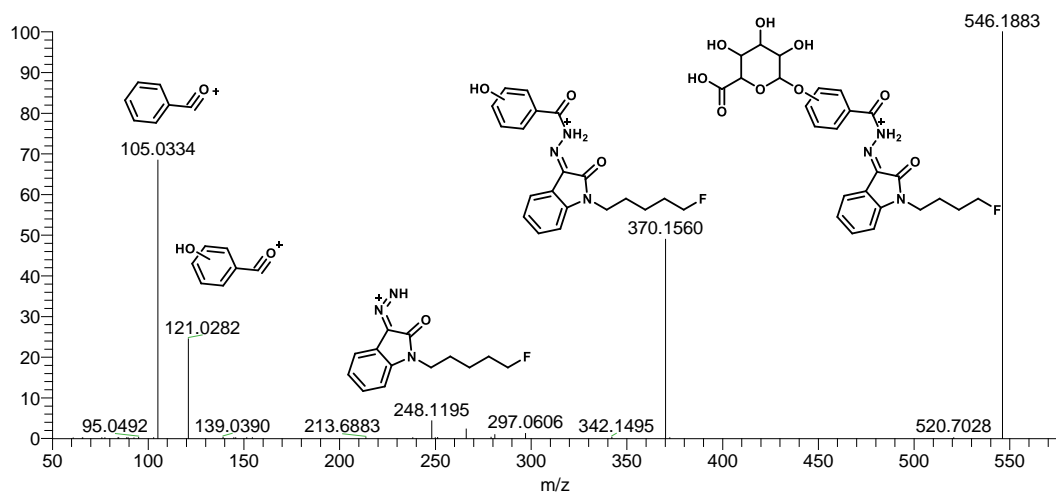

F22

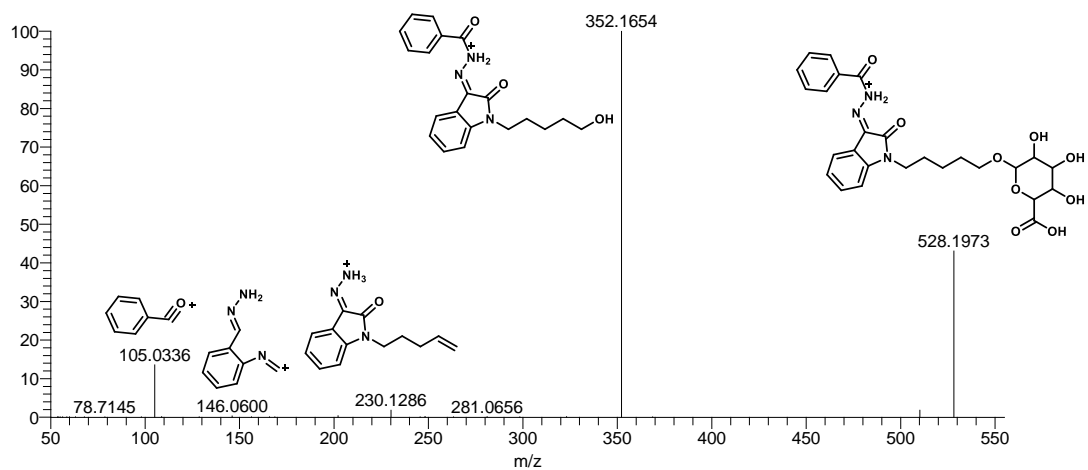

F23

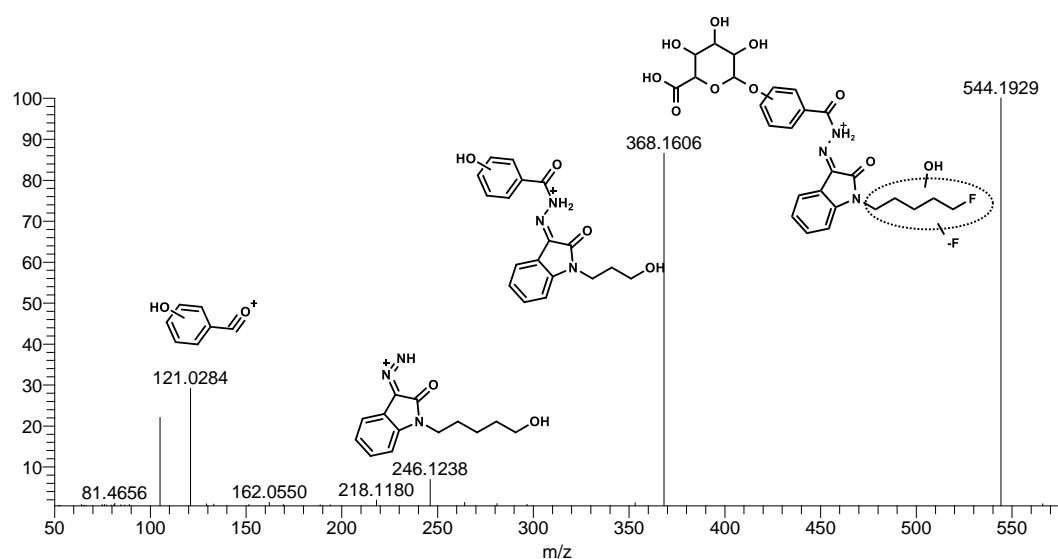

F24

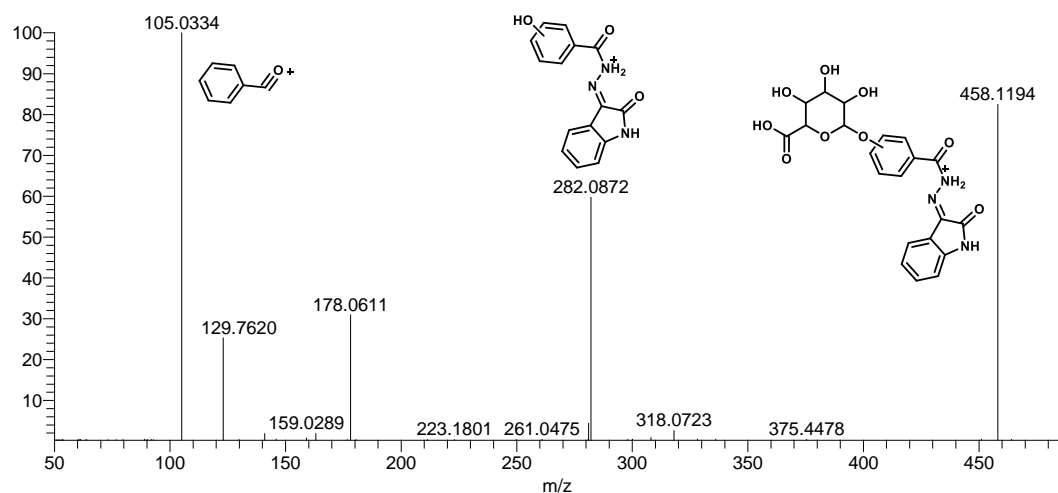

Supplement: s1 [file s1]
