# Supplementary material for: Study of the Metabolic Profiles of “Indazole-3-Carboxamide” and “Isatin Acyl Hydrazone” (OXIZID) Synthetic Cannabinoids in a Human Liver Microsome Model Using UHPLC-QE Orbitrap MS
Source: MDPI journal article supplement (doi:10.3390/metabo13040576), 2023-04-18
Supplement: s1 [file s1]

Table S1 UHPLC-QE-Orbitrap MS data of ADB-BUTINACA and its metabolites

| Name | Biotransformation             | Elemental composition <sup>a</sup>                                         | Theoretical mass (m/z) | Measured mass (m/z) | Error (ppm) | RT (min) | Peak areas (×10 <sup>7</sup> ) |
|------|-------------------------------|----------------------------------------------------------------------------|------------------------|---------------------|-------------|----------|--------------------------------|
| A0   | ADB-BUTINACA                  | C <sub>18</sub> H <sub>27</sub> N <sub>4</sub> O <sub>2</sub> <sup>+</sup> | 331.2129               | 331.2125            | 1.21        | 9.05     | 549.24                         |
| A1   | A0+Hydroxylation[A0+O]        | C <sub>18</sub> H <sub>27</sub> N <sub>4</sub> O <sub>3</sub> <sup>+</sup> | 347.2078               | 347.2074            | 1.15        | 7.00     | 125.16                         |
| A2   | A0+Hydroxylation[A0+O]        | C <sub>18</sub> H <sub>27</sub> N <sub>4</sub> O <sub>3</sub> <sup>+</sup> | 347.2078               | 347.2072            | 1.73        | 7.90     | 90.71                          |
| A3   | A0+O+Dehydrogenation[A0+O-2H] | C <sub>18</sub> H <sub>25</sub> N <sub>4</sub> O <sub>3</sub> <sup>+</sup> | 345.1921               | 345.1920            | 0.29        | 7.86     | 30.23                          |
| A4   | A0+Dihydroxylation[A0+2O]     | C <sub>18</sub> H <sub>27</sub> N <sub>4</sub> O <sub>4</sub> <sup>+</sup> | 363.2027               | 363.2027            | 0.00        | 6.11     | 2.86                           |
| A5   | A0+Dihydroxylation[A0+2O]     | C <sub>18</sub> H <sub>27</sub> N <sub>4</sub> O <sub>4</sub> <sup>+</sup> | 363.2027               | 363.2030            | -0.83       | 7.07     | 0.54                           |
| A6   | A0+2O-2H                      | C <sub>18</sub> H <sub>25</sub> N <sub>4</sub> O <sub>4</sub> <sup>+</sup> | 361.1870               | 361.1870            | 0.00        | 6.94     | 0.57                           |
| A7   | Amido hydrolysis              | C <sub>18</sub> H <sub>26</sub> N <sub>4</sub> O <sub>3</sub> <sup>+</sup> | 332.1969               | 332.1970            | -0.30       | 9.74     | 60.10                          |
| A8   | N-Dealkylation                | C <sub>14</sub> H <sub>19</sub> N <sub>4</sub> O <sub>2</sub> <sup>+</sup> | 275.1503               | 275.1496            | 2.54        | 6.65     | 11.13                          |
| A9   | A0+O+glucuronidation          | C <sub>24</sub> H <sub>35</sub> N <sub>4</sub> O <sub>9</sub> <sup>+</sup> | 523.2399               | 523.2408            | -1.72       | 6.38     | 64.40                          |

<sup>a</sup>: The elemental composition is for the protonated molecules.

Table S2 UHPLC-QE-Orbitrap MS data of MDMB-4en-PINACA and its metabolites

| Name | Biotransformation             | Elemental composition <sup>a</sup>                                         | Theoretical mass (m/z) | Measured mass (m/z) | Error (ppm) | RT (min) | Peak areas (×10 <sup>7</sup> ) |
|------|-------------------------------|----------------------------------------------------------------------------|------------------------|---------------------|-------------|----------|--------------------------------|
| B0   | Parent drug MDMB-4en-PINACA   | C <sub>20</sub> H <sub>28</sub> N <sub>3</sub> O <sub>3</sub> <sup>+</sup> | 358.2125               | 358.2122            | 0.84        | 11.07    | 619.44                         |
| B1   | B0+Hydroxylation[B0+O]        | C <sub>20</sub> H <sub>28</sub> N <sub>3</sub> O <sub>4</sub> <sup>+</sup> | 374.2074               | 374.2072            | 0.53        | 8.62     | 2.25                           |
| B2   | B0+Hydroxylation[B0+O]        | C <sub>20</sub> H <sub>28</sub> N <sub>3</sub> O <sub>4</sub> <sup>+</sup> | 374.2074               | 374.2076            | -0.53       | 8.99     | 46.10                          |
| B3   | B0+Hydroxylation[B0+O]        | C <sub>20</sub> H <sub>28</sub> N <sub>3</sub> O <sub>4</sub> <sup>+</sup> | 374.2074               | 374.2075            | -0.27       | 9.67     | 11.42                          |
| B4   | B0+Dihydroxylation[B0+2O]     | C <sub>20</sub> H <sub>28</sub> N <sub>3</sub> O <sub>5</sub> <sup>+</sup> | 390.2023               | 390.2022            | 0.26        | 8.16     | 16.10                          |
| B5   | B0+Dihydroxylation[B0+2O]     | C <sub>20</sub> H <sub>28</sub> N <sub>3</sub> O <sub>5</sub> <sup>+</sup> | 390.2023               | 390.2023            | 0.00        | 8.55     | 18.43                          |
| B6   | B0+2O+hydrogenation[B0+2O+2H] | C <sub>20</sub> H <sub>30</sub> N <sub>3</sub> O <sub>5</sub> <sup>+</sup> | 392.2180               | 392.2176            | 1.02        | 7.49     | 204.19                         |

|     |                                  |                           |          |          |       |      |        |
|-----|----------------------------------|---------------------------|----------|----------|-------|------|--------|
| B7  | B0+2O+hydrogenation[B0+2O+2H]    | $C_{20}H_{30}N_3O_5^+$    | 392.2180 | 392.2177 | 0.76  | 7.94 | 64.15  |
| B8  | B0+2O+Dehydrogenation[B0+2O-2H]  | $C_{20}H_{26}N_3O_5^+$    | 388.1867 | 388.1857 | 2.58  | 8.34 | 2.71   |
| B9  | B0+2O+2H+Hydroxylation[B0+3O+2H] | $C_{20}H_{30}N_3O_6^+$    | 408.2129 | 408.2127 | 0.49  | 6.86 | 7.79   |
| B10 | Ester hydrolysis[B10]            | $C_{19}H_{26}N_3O_3^+$    | 344.1969 | 344.1967 | 0.58  | 9.10 | 6.90   |
| B11 | B10+O                            | $C_{19}H_{26}N_3O_4^+$    | 360.1918 | 360.1916 | 0.56  | 7.20 | 82.71  |
| B12 | B10+O+2H                         | $C_{19}H_{28}N_3O_3^+$    | 362.2074 | 362.2070 | 1.10  | 7.08 | 2.58   |
| B13 | B10+O-2H                         | $C_{19}H_{24}N_3O_4^+$    | 358.1761 | 358.1759 | 0.56  | 7.27 | 0.29   |
| B14 | B10+O-2H                         | $C_{19}H_{24}N_3O_4^+$    | 358.1761 | 358.1759 | 0.56  | 7.63 | 7.79   |
| B15 | B10+O-2H                         | $C_{19}H_{24}N_3O_4^+$    | 358.1761 | 358.1766 | -1.40 | 8.75 | 1.14   |
| B16 | B10+2O                           | $C_{19}H_{26}N_3O_5^+$    | 376.1867 | 376.1866 | 0.27  | 6.67 | 11.15  |
| B17 | B10+2O                           | $C_{19}H_{26}N_3O_5^+$    | 376.1867 | 376.1868 | -0.27 | 7.32 | 7.96   |
| B18 | B10+2O-2H                        | $C_{19}H_{24}N_3O_5^+$    | 374.1710 | 374.1708 | 0.53  | 7.14 | 0.84   |
| B19 | B10+2O-2H                        | $C_{19}H_{24}N_3O_5^+$    | 374.1710 | 374.1708 | 0.53  | 7.66 | 0.77   |
| B20 | B10+2O+2H                        | $C_{19}H_{28}N_3O_5^+$    | 378.2023 | 378.2020 | 0.79  | 6.87 | 100.00 |
| B21 | Amido hydrolysis+Hydroxylation   | $C_{13}H_{15}N_2O_3^+$    | 247.1077 | 247.1077 | 0.00  | 6.17 | 1.99   |
| B22 | Amido hydrolysis+Hydroxylation   | $C_{13}H_{15}N_2O_3^+$    | 247.1077 | 247.1077 | 0.00  | 7.49 | 2.46   |
| B23 | Amido hydrolysis+Hydroxylation   | $C_{13}H_{15}N_2O_3^+$    | 247.1077 | 247.1077 | 0.00  | 7.95 | 1.01   |
| B24 | N-Dealkylation                   | $C_{15}H_{20}N_3O_3^+$    | 290.1499 | 290.1501 | -0.69 | 8.32 | 4.62   |
| B25 | B0+O+glucuronidation             | $C_{26}H_{36}N_3O_{10}^+$ | 550.2395 | 550.2411 | -2.91 | 6.24 | 0.33   |
| B26 | B0+O+glucuronidation             | $C_{26}H_{36}N_3O_{10}^+$ | 550.2395 | 550.2416 | -3.82 | 6.64 | 2.63   |
| B27 | B0+O+glucuronidation             | $C_{26}H_{36}N_3O_{10}^+$ | 550.2395 | 550.2405 | -1.82 | 7.00 | 2.56   |
| B28 | B10+O+glucuronidation            | $C_{25}H_{34}N_3O_9^+$    | 520.2290 | 520.2292 | -0.38 | 7.23 | 3.97   |
| B29 | B10+glucuronidation              | $C_{26}H_{38}N_3O_{11}^+$ | 568.2501 | 568.2500 | 0.18  | 6.64 | 2.63   |

<sup>a</sup>: The elemental composition is for the protonated molecules.

Table S3 UHPLC-QE-Orbitrap MS data of BZO-HEXOXIZID and its metabolites

| Name | Biotransformation               | Elemental composition <sup>a</sup>                                         | Theoretical mass (m/z) | Measured mass (m/z) | Error (ppm) | RT (min) | Peak areas (×10 <sup>7</sup> ) |
|------|---------------------------------|----------------------------------------------------------------------------|------------------------|---------------------|-------------|----------|--------------------------------|
| C0   | Parent drug BZO-HEXOXIZID       | C <sub>21</sub> H <sub>24</sub> N <sub>3</sub> O <sub>2</sub> <sup>+</sup> | 350.1863               | 350.1860            | 0.86        | 11.67    | 484.26                         |
| C1   | C0+Hydroxylation[C0+O]          | C <sub>21</sub> H <sub>24</sub> N <sub>3</sub> O <sub>3</sub> <sup>+</sup> | 366.1812               | 366.1812            | 0.00        | 7.62     | 24.83                          |
| C2   | C0+Hydroxylation[C0+O]          | C <sub>21</sub> H <sub>24</sub> N <sub>3</sub> O <sub>3</sub> <sup>+</sup> | 366.1812               | 366.1810            | 0.55        | 8.68     | 137.05                         |
| C3   | C0+Hydroxylation[C0+O]          | C <sub>21</sub> H <sub>24</sub> N <sub>3</sub> O <sub>3</sub> <sup>+</sup> | 366.1812               | 366.1810            | 0.55        | 8.91     | 168.13                         |
| C4   | C0+Hydroxylation[C0+O]          | C <sub>21</sub> H <sub>24</sub> N <sub>3</sub> O <sub>3</sub> <sup>+</sup> | 366.1812               | 366.1812            | 0.00        | 10.40    | 17.10                          |
| C5   | C0+O+Dehydrogenation[C0+O-2H]   | C <sub>21</sub> H <sub>22</sub> N <sub>3</sub> O <sub>3</sub> <sup>+</sup> | 364.1656               | 364.1654            | 0.55        | 7.89     | 25.90                          |
| C6   | C0+O+Dehydrogenation[C0+O-2H]   | C <sub>21</sub> H <sub>22</sub> N <sub>3</sub> O <sub>3</sub> <sup>+</sup> | 364.1656               | 364.1652            | 1.10        | 9.08     | 427.19                         |
| C7   | C0+O+Dehydrogenation[C0+O-2H]   | C <sub>21</sub> H <sub>22</sub> N <sub>3</sub> O <sub>3</sub> <sup>+</sup> | 364.1656               | 364.1652            | 1.10        | 9.45     | 145.85                         |
| C8   | C0+Dihydroxylation[C0+2O]       | C <sub>21</sub> H <sub>24</sub> N <sub>3</sub> O <sub>4</sub> <sup>+</sup> | 382.1761               | 382.1761            | 0.00        | 6.78     | 6.99                           |
| C9   | C0+Dihydroxylation[C0+2O]       | C <sub>21</sub> H <sub>24</sub> N <sub>3</sub> O <sub>4</sub> <sup>+</sup> | 382.1761               | 382.1759            | 0.52        | 7.54     | 85.80                          |
| C10  | C0+2O+Dehydrogenation[C0+2O-2H] | C <sub>21</sub> H <sub>22</sub> N <sub>3</sub> O <sub>4</sub> <sup>+</sup> | 380.1605               | 380.1604            | 0.26        | 7.21     | 6.89                           |
| C11  | C0+2O+Dehydrogenation[C0+2O-2H] | C <sub>21</sub> H <sub>22</sub> N <sub>3</sub> O <sub>4</sub> <sup>+</sup> | 380.1605               | 380.1602            | 0.79        | 8.13     | 112.44                         |
| C12  | C0+2O+Dehydrogenation[C0+2O-2H] | C <sub>21</sub> H <sub>22</sub> N <sub>3</sub> O <sub>4</sub> <sup>+</sup> | 380.1605               | 380.1603            | 0.53        | 8.52     | 49.10                          |
| C13  | C0+2O+Hydroxylation[C0+3O]      | C <sub>21</sub> H <sub>24</sub> N <sub>3</sub> O <sub>5</sub> <sup>+</sup> | 398.1710               | 398.1711            | -0.25       | 6.87     | 0.99                           |
| C14  | C0+2O+Hydroxylation[C0+3O]      | C <sub>21</sub> H <sub>24</sub> N <sub>3</sub> O <sub>5</sub> <sup>+</sup> | 398.1710               | 398.1704            | 1.51        | 7.30     | 0.24                           |
| C15  | N-Dealkylation                  | C <sub>15</sub> H <sub>12</sub> N <sub>3</sub> O <sub>2</sub> <sup>+</sup> | 266.0924               | 266.0918            | 2.25        | 6.83     | 3.87                           |
| C16  | Amido hydrolysis[C16]           | C <sub>14</sub> H <sub>20</sub> N <sub>3</sub> O <sup>+</sup>              | 246.1601               | 246.1603            | -0.81       | 10.48    | 0.28                           |
| C17  | C16+Hydroxylation[C16+O]        | C <sub>14</sub> H <sub>20</sub> N <sub>3</sub> O <sub>2</sub> <sup>+</sup> | 262.1550               | 262.1553            | -1.14       | 6.32     | 0.81                           |
| C18  | C16+Hydroxylation[C16+O]        | C <sub>14</sub> H <sub>20</sub> N <sub>3</sub> O <sub>2</sub> <sup>+</sup> | 262.1550               | 262.1552            | -0.76       | 7.18     | 0.46                           |
| C19  | C16+Hydroxylation[C16+O]        | C <sub>14</sub> H <sub>20</sub> N <sub>3</sub> O <sub>2</sub> <sup>+</sup> | 262.1550               | 262.1553            | -1.14       | 7.42     | 1.05                           |
| C20  | C16+Hydroxylation[C16+O]        | C <sub>14</sub> H <sub>20</sub> N <sub>3</sub> O <sub>2</sub> <sup>+</sup> | 262.1550               | 262.1553            | -1.14       | 8.77     | 0.13                           |
| C21  | C16+O+Dehydrogenation[C16+O-2H] | C <sub>14</sub> H <sub>18</sub> N <sub>3</sub> O <sub>2</sub> <sup>+</sup> | 260.1394               | 260.1393            | 0.38        | 6.46     | 5.03                           |

|     |                                   |                           |          |          |       |      |       |
|-----|-----------------------------------|---------------------------|----------|----------|-------|------|-------|
| C22 | C16+O+Dehydrogenation[C16+O-2H]   | $C_{14}H_{18}N_3O_2^+$    | 260.1394 | 260.1393 | 0.38  | 7.72 | 10.16 |
| C23 | C16+Dihydrogenation[C16+2O]       | $C_{14}H_{20}N_3O_3^+$    | 278.1499 | 278.1502 | -1.08 | 5.45 | 0.23  |
| C24 | C16+2O+Dehydrogenation[C16+2O-2H] | $C_{14}H_{18}N_3O_3^+$    | 276.1343 | 276.1342 | 0.36  | 5.55 | 0.71  |
| C25 | C16+2O+Dehydrogenation[C16+2O-2H] | $C_{14}H_{18}N_3O_3^+$    | 276.1343 | 276.1342 | 0.36  | 6.37 | 1.20  |
| C26 | C16+2O+Dehydrogenation[C16+2O-2H] | $C_{14}H_{18}N_3O_3^+$    | 276.1343 | 276.1345 | -0.72 | 6.70 | 0.72  |
| C27 | C0+O+glucuronidation              | $C_{27}H_{32}N_3O_9^+$    | 542.2133 | 542.2133 | 0.00  | 7.39 | 4.14  |
| C28 | C0+O+glucuronidation              | $C_{27}H_{32}N_3O_9^+$    | 542.2133 | 542.2133 | 0.00  | 7.55 | 5.99  |
| C29 | C0+O+glucuronidation              | $C_{27}H_{32}N_3O_9^+$    | 542.2133 | 542.2133 | 0.00  | 7.81 | 3.62  |
| C30 | C0+O+glucuronidation              | $C_{27}H_{32}N_3O_9^+$    | 542.2133 | 542.2137 | -0.74 | 8.17 | 7.92  |
| C31 | C0+O+glucuronidation              | $C_{27}H_{32}N_3O_9^+$    | 542.2133 | 542.2136 | -0.55 | 8.64 | 18.10 |
| C32 | C0+2O+glucuronidation             | $C_{27}H_{32}N_3O_{10}^+$ | 558.2082 | 558.2086 | -0.72 | 6.80 | 6.14  |
| C33 | C0+2O+glucuronidation             | $C_{27}H_{32}N_3O_{10}^+$ | 558.2082 | 558.2079 | 0.54  | 8.05 | 1.53  |
| C34 | C0+2O-2H+glucuronidation          | $C_{27}H_{30}N_3O_{10}^+$ | 556.1926 | 556.1929 | -0.54 | 6.94 | 4.87  |

<sup>a</sup>: The elemental composition is for the protonated molecules.

Table S4 UHPLC-QE-Orbitrap data of BZO-POXIZID and its metabolites

| Name | Biotransformation             | Elemental composition <sup>a</sup> | Theoretical mass (m/z) | Measured mass (m/z) | Error (ppm) | RT (min) | Peak areas ( $\times 10^7$ ) |
|------|-------------------------------|------------------------------------|------------------------|---------------------|-------------|----------|------------------------------|
| D0   | BZO-POXIZID                   | $C_{20}H_{22}N_3O_2^+$             | 336.1707               | 336.1703            | 1.19        | 11.11    | 512.08                       |
| D1   | D0+Hydroxylation[D0+O]        | $C_{20}H_{22}N_3O_2^+$             | 352.1656               | 352.1652            | 1.14        | 7.29     | 22.14                        |
| D2   | D0+Hydroxylation[D0+O]        | $C_{20}H_{22}N_3O_2^+$             | 352.1656               | 352.1655            | 0.28        | 8.30     | 222.30                       |
| D3   | D0+Hydroxylation[D0+O]        | $C_{20}H_{22}N_3O_2^+$             | 352.1656               | 352.1653            | 0.85        | 8.74     | 46.61                        |
| D4   | D0+Hydroxylation[D0+O]        | $C_{20}H_{22}N_3O_2^+$             | 352.1656               | 352.1654            | 0.57        | 9.91     | 13.03                        |
| D5   | D0+O+Dehydrogenation[D0+O-2H] | $C_{20}H_{20}N_3O_2^+$             | 350.1499               | 350.1495            | 1.14        | 7.67     | 12.81                        |
| D6   | D0+O+Dehydrogenation[D0+O-2H] | $C_{20}H_{20}N_3O_2^+$             | 350.1499               | 350.1496            | 0.86        | 8.82     | 237.51                       |

|     |                                 |                           |          |          |       |      |       |
|-----|---------------------------------|---------------------------|----------|----------|-------|------|-------|
| D7  | D0+Dihydroxylation[D0+2O]       | $C_{20}H_{22}N_3O_4^+$    | 368.1605 | 368.1604 | 0.27  | 6.58 | 4.97  |
| D8  | D0+Dihydroxylation[D0+2O]       | $C_{20}H_{22}N_3O_4^+$    | 368.1605 | 368.1601 | 1.09  | 7.30 | 32.50 |
| D9  | D0+2O+Dehydrogenation[D0+2O-2H] | $C_{20}H_{20}N_3O_4^+$    | 366.1448 | 366.1445 | 0.82  | 7.42 | 2.66  |
| D10 | D0+2O+Dehydrogenation[D0+2O-2H] | $C_{20}H_{20}N_3O_4^+$    | 366.1448 | 366.1447 | 0.27  | 7.64 | 12.10 |
| D11 | D0+2O+Dehydrogenation[D0+2O-2H] | $C_{20}H_{20}N_3O_4^+$    | 366.1448 | 366.1448 | 0.00  | 7.79 | 10.52 |
| D12 | N-Dealkylation                  | $C_{15}H_{12}N_3O_2^+$    | 266.0924 | 266.0924 | 0.00  | 6.85 | 4.23  |
| D13 | N-Dealkylation+Hydroxylation    | $C_{15}H_{12}N_3O_3^+$    | 282.0873 | 282.0869 | 1.42  | 5.99 | 0.33  |
| D14 | N-Dealkylation+Hydroxylation    | $C_{15}H_{12}N_3O_3^+$    | 282.0873 | 282.0875 | -0.71 | 6.42 | 0.20  |
| D15 | N-Dealkylation+Hydroxylation    | $C_{15}H_{12}N_3O_3^+$    | 282.0873 | 282.0874 | -0.35 | 6.95 | 0.84  |
| D16 | Amido hydrolysis[D16]           | $C_{13}H_{18}N_3O^+$      | 232.1444 | 232.1444 | 0.00  | 9.87 | 0.24  |
| D17 | D16+Hydroxylation[D16+O]        | $C_{13}H_{18}N_3O_2^+$    | 248.1394 | 248.1396 | -0.81 | 5.89 | 0.59  |
| D18 | D16+Hydroxylation[D16+O]        | $C_{13}H_{18}N_3O_2^+$    | 248.1394 | 248.1394 | 0.00  | 6.20 | 0.36  |
| D19 | D16+Hydroxylation[D16+O]        | $C_{13}H_{18}N_3O_2^+$    | 248.1394 | 248.1396 | -0.81 | 6.70 | 0.51  |
| D20 | D16+Hydroxylation[D16+O]        | $C_{13}H_{18}N_3O_2^+$    | 248.1394 | 248.1393 | 0.40  | 6.95 | 2.17  |
| D21 | D16+O+Dehydrogenation[D0+O-2H]  | $C_{13}H_{16}N_3O_2^+$    | 246.1237 | 246.1234 | 1.22  | 6.09 | 0.77  |
| D22 | D16+O+Dehydrogenation[D0+O-2H]  | $C_{13}H_{16}N_3O_2^+$    | 246.1237 | 246.1236 | 0.41  | 6.57 | 0.42  |
| D23 | D16+O+Dehydrogenation[D0+O-2H]  | $C_{13}H_{16}N_3O_2^+$    | 246.1237 | 246.1237 | 0.00  | 6.95 | 1.04  |
| D24 | D16+O+Dehydrogenation[D0+O-2H]  | $C_{13}H_{16}N_3O_2^+$    | 246.1237 | 246.1234 | 1.22  | 7.35 | 4.90  |
| D25 | D16+O+Dehydrogenation[D0+O-2H]  | $C_{13}H_{16}N_3O_2^+$    | 246.1237 | 246.1238 | -0.41 | 5.70 | 0.19  |
| D26 | D0+O+glucuronidation            | $C_{26}H_{30}N_3O_9^+$    | 528.1977 | 528.1968 | 1.70  | 7.23 | 9.63  |
| D27 | D0+O+glucuronidation            | $C_{26}H_{30}N_3O_9^+$    | 528.1977 | 528.1970 | 1.33  | 7.79 | 3.92  |
| D28 | D0+O+glucuronidation            | $C_{26}H_{30}N_3O_9^+$    | 528.1977 | 528.1978 | -0.19 | 8.17 | 15.30 |
| D29 | D0+2O+glucuronidation           | $C_{26}H_{30}N_3O_{10}^+$ | 544.1926 | 544.1929 | -0.55 | 6.56 | 4.13  |
| D30 | D0+2O+glucuronidation           | $C_{26}H_{30}N_3O_{10}^+$ | 544.1926 | 544.1922 | 0.74  | 7.75 | 2.67  |

<sup>a</sup>: The elemental composition is for the protonated molecules.

Table S5 UHPLC-QE-Orbitrap data of BZO-4en-POXIZID and its metabolites

| Name | Biotransformation                | Elemental composition <sup>a</sup>                                         | Theoretical mass (m/z) | Measured mass (m/z) | Error (ppm) | RT (min) | Peak areas ( $\times 10^7$ ) |
|------|----------------------------------|----------------------------------------------------------------------------|------------------------|---------------------|-------------|----------|------------------------------|
| E0   | BZO-4en-POXIZID                  | C <sub>20</sub> H <sub>20</sub> N <sub>3</sub> O <sub>2</sub> <sup>+</sup> | 334.1550               | 334.1546            | 1.20        | 10.53    | 659.12                       |
| E1   | E0+Hydroxylation[E0+O]           | C <sub>20</sub> H <sub>20</sub> N <sub>3</sub> O <sub>3</sub> <sup>+</sup> | 350.1499               | 350.1496            | 0.86        | 7.18     | 7.36                         |
| E2   | E0+Hydroxylation[E0+O]           | C <sub>20</sub> H <sub>20</sub> N <sub>3</sub> O <sub>3</sub> <sup>+</sup> | 350.1499               | 350.1498            | 0.29        | 7.49     | 6.10                         |
| E3   | E0+Hydroxylation[E0+O]           | C <sub>20</sub> H <sub>20</sub> N <sub>3</sub> O <sub>3</sub> <sup>+</sup> | 350.1499               | 350.1500            | -0.29       | 8.55     | 118.45                       |
| E4   | E0+Hydroxylation[E0+O]           | C <sub>20</sub> H <sub>20</sub> N <sub>3</sub> O <sub>3</sub> <sup>+</sup> | 350.1499               | 350.1496            | 0.86        | 8.15     | 12.40                        |
| E5   | E0+O+hydrogenation[E0+O+2H]      | C <sub>20</sub> H <sub>22</sub> N <sub>3</sub> O <sub>3</sub> <sup>+</sup> | 352.1656               | 352.1655            | 0.28        | 8.29     | 12.72                        |
| E6   | E0+O+hydrogenation[E0+O+2H]      | C <sub>20</sub> H <sub>22</sub> N <sub>3</sub> O <sub>3</sub> <sup>+</sup> | 352.1656               | 352.1648            | 2.27        | 8.73     | 1.89                         |
| E7   | E0+Dihydroxylation[E0+2O]        | C <sub>20</sub> H <sub>20</sub> N <sub>3</sub> O <sub>4</sub> <sup>+</sup> | 366.1448               | 366.1446            | 0.55        | 8.21     | 9.97                         |
| E8   | E0+Dihydroxylation[E0+2O]        | C <sub>20</sub> H <sub>20</sub> N <sub>3</sub> O <sub>4</sub> <sup>+</sup> | 366.1448               | 366.1448            | 0.00        | 7.74     | 32.30                        |
| E9   | E0+2O+Dehydrogenation[E0+2O-2H]  | C <sub>20</sub> H <sub>18</sub> N <sub>3</sub> O <sub>4</sub> <sup>+</sup> | 364.1292               | 364.1293            | -0.27       | 8.06     | 2.96                         |
| E10  | E0+2O+Hydrogenation[E0+2O+2H]    | C <sub>20</sub> H <sub>22</sub> N <sub>3</sub> O <sub>4</sub> <sup>+</sup> | 368.1605               | 368.1605            | 0.00        | 7.19     | 277.39                       |
| E11  | E0+2O+2H+Hydroxylation[E0+3O+2H] | C <sub>20</sub> H <sub>22</sub> N <sub>3</sub> O <sub>4</sub> <sup>+</sup> | 384.1554               | 384.1554            | 0.00        | 6.65     | 15.90                        |
| E12  | Amido hydrolysis[E12]            | C <sub>13</sub> H <sub>16</sub> N <sub>3</sub> O <sup>+</sup>              | 230.1288               | 230.1289            | -0.43       | 9.28     | 1.55                         |
| E13  | E12+Dehydrogenation[E12-2H]      | C <sub>13</sub> H <sub>14</sub> N <sub>3</sub> O <sup>+</sup>              | 228.1131               | 228.1131            | 0.00        | 8.55     | 8.27                         |
| E14  | E12+Hydroxylation[E12+O]         | C <sub>13</sub> H <sub>16</sub> N <sub>3</sub> O <sub>2</sub> <sup>+</sup> | 246.1237               | 246.1236            | 0.41        | 5.95     | 1.87                         |
| E15  | E12+Hydroxylation[E12+O]         | C <sub>13</sub> H <sub>16</sub> N <sub>3</sub> O <sub>2</sub> <sup>+</sup> | 246.1237               | 246.1238            | -0.41       | 6.54     | 0.97                         |
| E16  | E12+Hydroxylation[E12+O]         | C <sub>13</sub> H <sub>16</sub> N <sub>3</sub> O <sub>2</sub> <sup>+</sup> | 246.1237               | 246.1236            | 0.41        | 7.91     | 13.80                        |
| E17  | E12+O+hydrogenation[E12+O+2H]    | C <sub>13</sub> H <sub>18</sub> N <sub>3</sub> O <sub>2</sub> <sup>+</sup> | 248.1343               | 248.1393            | -20.15      | 5.90     | 0.10                         |
| E18  | E12+O+hydrogenation[E12+O+2H]    | C <sub>13</sub> H <sub>18</sub> N <sub>3</sub> O <sub>2</sub> <sup>+</sup> | 248.1343               | 248.1396            | -21.36      | 6.17     | 0.06                         |
| E19  | E12+O+hydrogenation[E12+O+2H]    | C <sub>13</sub> H <sub>18</sub> N <sub>3</sub> O <sub>2</sub> <sup>+</sup> | 248.1343               | 248.1392            | -19.75      | 6.97     | 0.57                         |
| E20  | E12+Dihydroxylation[E12+2O]      | C <sub>13</sub> H <sub>16</sub> N <sub>3</sub> O <sub>3</sub> <sup>+</sup> | 262.1186               | 262.1186            | 0.00        | 5.98     | 1.55                         |

|     |                                 |                           |          |          |      |      |      |
|-----|---------------------------------|---------------------------|----------|----------|------|------|------|
| E21 | E12+Dihydroxylation[E12+2O]     | $C_{13}H_{16}N_3O_3^+$    | 262.1186 | 262.1186 | 0.00 | 6.65 | 0.65 |
| E22 | E12+2O+Hydrogenation[E12+2O+2H] | $C_{13}H_{18}N_3O_3^+$    | 264.1343 | 264.1342 | 0.38 | 5.10 | 1.02 |
| E23 | E12+2O+Hydrogenation[E12+2O+2H] | $C_{13}H_{18}N_3O_3^+$    | 264.1343 | 264.1340 | 1.14 | 5.94 | 3.66 |
| E24 | N-Dealkylation                  | $C_{15}H_{12}N_3O_2^+$    | 266.0924 | 266.0924 | 0.00 | 6.85 | 1.59 |
| E25 | E0+O+2H+glucuronidation         | $C_{26}H_{30}N_3O_9^+$    | 528.1977 | 528.1962 | 2.84 | 7.18 | 0.27 |
| E26 | E0+2O+2H+glucuronidation        | $C_{26}H_{30}N_3O_{10}^+$ | 544.1926 | 544.1915 | 2.02 | 6.63 | 1.33 |

<sup>a</sup>: The elemental composition is for the protonated molecules.

Table S6 UHPLC-QE-Orbitrap data of 5F-BZO-POXIZID and its metabolites

| Name | Biotransformation                       | Elemental composition <sup>a</sup> | Theoretical mass (m/z) | Measured mass (m/z) | Error (ppm) | RT (min) | Peak areas ( $\times 10^7$ ) |
|------|-----------------------------------------|------------------------------------|------------------------|---------------------|-------------|----------|------------------------------|
| F0   | 5F-BZO-POXIZID                          | $C_{20}H_{21}FN_3O_2^+$            | 354.1612               | 354.1608            | 1.13        | 10.01    | 553.71                       |
| F1   | F0+Hydroxylation[F0+O]                  | $C_{20}H_{21}FN_3O_3^+$            | 370.1561               | 370.1559            | 0.54        | 7.55     | 11.30                        |
| F2   | F0+Hydroxylation[F0+O]                  | $C_{20}H_{21}FN_3O_3^+$            | 370.1561               | 370.1558            | 0.81        | 8.43     | 149.01                       |
| F3   | F0+O+Dehydrogenation[F0+O-2H]           | $C_{20}H_{19}FN_3O_3^+$            | 368.1405               | 368.1404            | 0.27        | 7.99     | 1.17                         |
| F4   | F0+O+Dehydrogenation[F0+O-2H]           | $C_{20}H_{19}FN_3O_3^+$            | 368.1405               | 368.1418            | -3.53       | 8.58     | 0.93                         |
| F5   | F0+O+Dehydrogenation[F0+O-2H]           | $C_{20}H_{19}FN_3O_3^+$            | 368.1405               | 368.1403            | 0.54        | 8.97     | 7.21                         |
| F6   | F0+Defluorination+Hydroxylation[F0-F+O] | $C_{20}H_{22}FN_3O_3^+$            | 352.1656               | 352.1652            | 1.14        | 8.26     | 446.13                       |
| F7   | F0+Defluorination+Hydroxylation[F0-F+O] | $C_{20}H_{22}FN_3O_3^+$            | 352.1656               | 352.1653            | 0.85        | 7.31     | 21.90                        |
| F8   | F0-F+O+Dehydrogenation[F0-F+2O]         | $C_{20}H_{22}FN_3O_4^+$            | 368.1605               | 368.1602            | 0.81        | 6.52     | 1.82                         |
| F9   | F0-F+O+Dehydrogenation[F0-F+2O]         | $C_{20}H_{22}FN_3O_4^+$            | 368.1605               | 368.1607            | -0.54       | 7.71     | 20.79                        |
| F10  | F0-F+O+Dehydrogenation[F0-F+2O]         | $C_{20}H_{22}FN_3O_4^+$            | 368.1605               | 368.1602            | 0.81        | 7.45     | 7.53                         |
| F11  | F0-F+2O+Dehydrogenation[F0-F+2O-2H]     | $C_{20}H_{20}FN_3O_4^+$            | 366.1448               | 366.1444            | 1.09        | 8.19     | 171.18                       |
| F12  | Amido hydrolysis[F11]                   | $C_{13}H_{17}FN_3O^+$              | 250.1350               | 250.1349            | 0.40        | 7.35     | 4.45                         |
| F13  | F11+Hydroxylation[F11+O]                | $C_{13}H_{17}FN_3O_2^+$            | 266.1299               | 266.1298            | 0.38        | 5.12     | 2.04                         |

|     |                                     |                                                                             |          |          |       |      |       |
|-----|-------------------------------------|-----------------------------------------------------------------------------|----------|----------|-------|------|-------|
| F14 | F11+Hydroxylation[F11+O]            | C <sub>13</sub> H <sub>17</sub> FN <sub>3</sub> O <sub>2</sub> <sup>+</sup> | 266.1299 | 266.1295 | 1.50  | 5.58 | 0.22  |
| F15 | F11+Hydroxylation[F11+O]            | C <sub>13</sub> H <sub>17</sub> FN <sub>3</sub> O <sub>2</sub> <sup>+</sup> | 266.1299 | 266.1301 | -0.75 | 5.87 | 0.29  |
| F16 | N-Dealkylation[F15]                 | C <sub>15</sub> H <sub>12</sub> N <sub>3</sub> O <sub>2</sub> <sup>+</sup>  | 266.0924 | 266.0923 | 0.38  | 6.84 | 9.88  |
| F17 | N-Dealkylation+Hydroxylation[F15+O] | C <sub>15</sub> H <sub>12</sub> N <sub>3</sub> O <sub>3</sub> <sup>+</sup>  | 282.0873 | 282.0869 | 1.42  | 5.97 | 1.11  |
| F18 | N-Dealkylation+Hydroxylation[F15+O] | C <sub>15</sub> H <sub>12</sub> N <sub>3</sub> O <sub>3</sub> <sup>+</sup>  | 282.0873 | 282.0870 | 1.06  | 6.44 | 0.55  |
| F19 | N-Dealkylation+Hydroxylation[F15+O] | C <sub>15</sub> H <sub>12</sub> N <sub>3</sub> O <sub>3</sub> <sup>+</sup>  | 282.0873 | 282.0873 | 0.00  | 7.22 | 11.12 |
| F20 | F0+O+glucuronidation                | C <sub>26</sub> H <sub>29</sub> FN <sub>3</sub> O <sub>9</sub> <sup>+</sup> | 546.1882 | 546.1882 | 0.00  | 7.12 | 8.78  |
| F21 | F0+O+glucuronidation                | C <sub>26</sub> H <sub>29</sub> FN <sub>3</sub> O <sub>9</sub> <sup>+</sup> | 546.1882 | 546.1884 | -0.37 | 7.57 | 22.08 |
| F22 | F0-F+O+glucuronidation              | C <sub>26</sub> H <sub>30</sub> N <sub>3</sub> O <sub>9</sub> <sup>+</sup>  | 528.1977 | 528.1973 | 0.76  | 7.15 | 9.13  |
| F23 | F0-F+2O+glucuronidation             | C <sub>26</sub> H <sub>30</sub> N <sub>3</sub> O <sub>10</sub> <sup>+</sup> | 544.1926 | 544.1929 | -0.55 | 6.46 | 6.17  |
| F24 | F15+O+glucuronidation               | C <sub>21</sub> H <sub>20</sub> N <sub>3</sub> O <sub>9</sub> <sup>+</sup>  | 458.1194 | 458.1194 | 0.00  | 5.95 | 5.18  |

<sup>a</sup>: The elemental composition is for the protonated molecules.
