# Supplementary material for: Study of the Metabolic Profiles of “Indazole-3-Carboxamide” and “Isatin Acyl Hydrazone” (OXIZID) Synthetic Cannabinoids in a Human Liver Microsome Model Using UHPLC-QE Orbitrap MS
Source: MDPI journal article supplement (doi:10.3390/metabo13040576), 2023-04-18

**Figure S1** Extracted ion chromatograms of ADB-BUTINACA and its metabolites

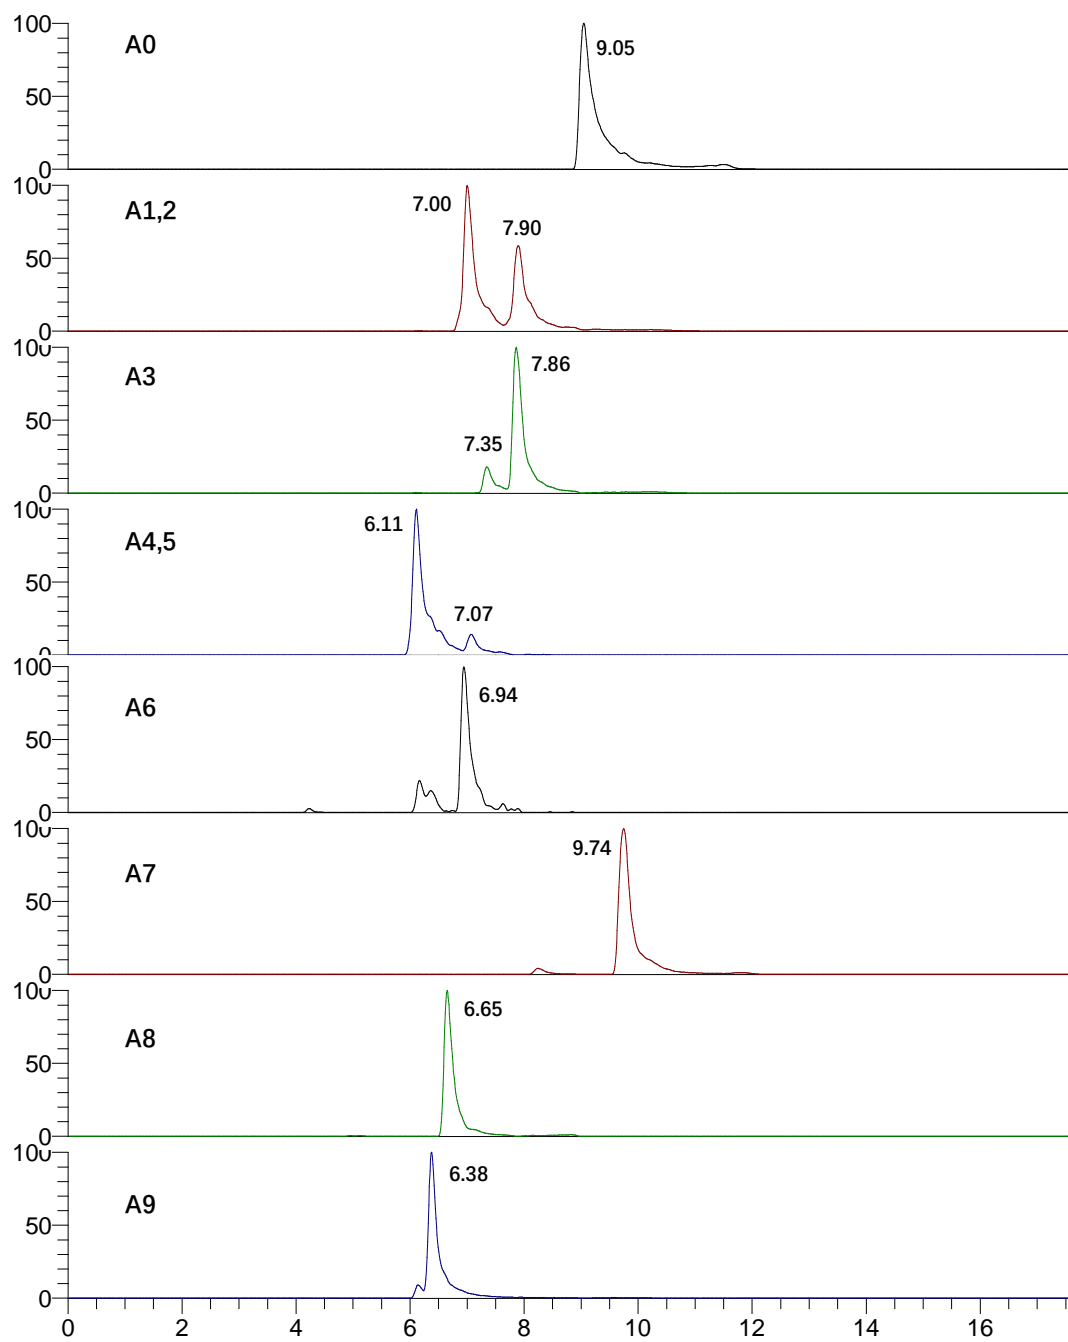

**Figure S2** Extracted ion chromatograms of MDMB-4en-PINACA and its metabolites

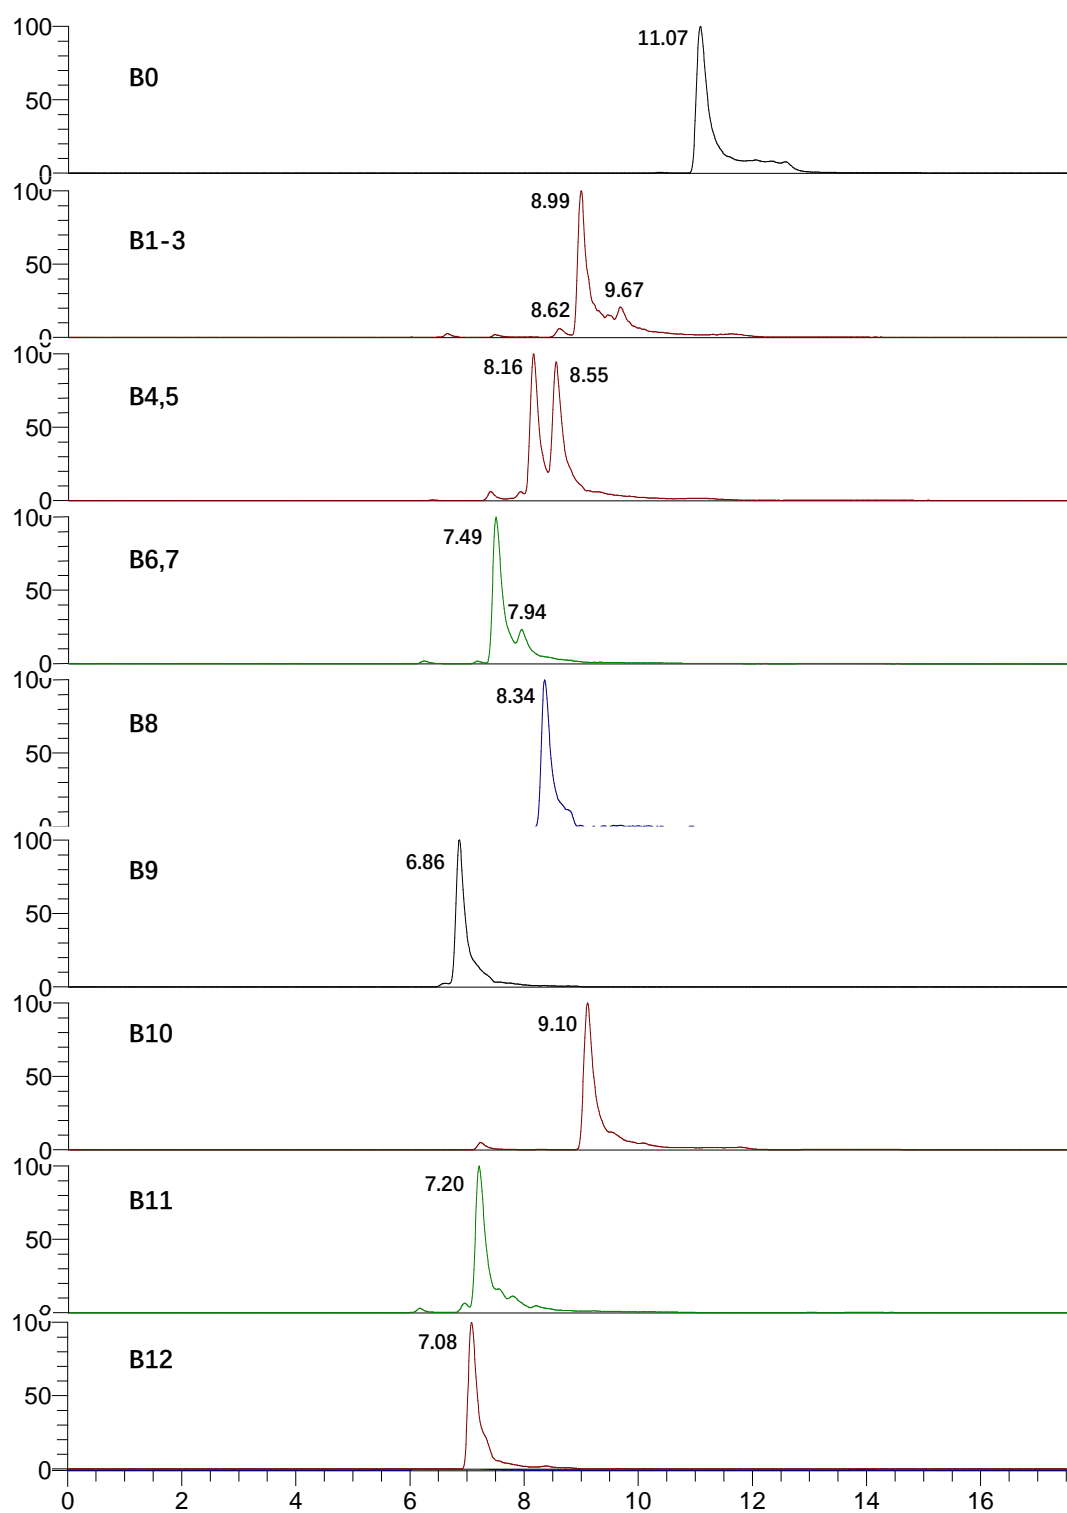

Figure S2 (continued)

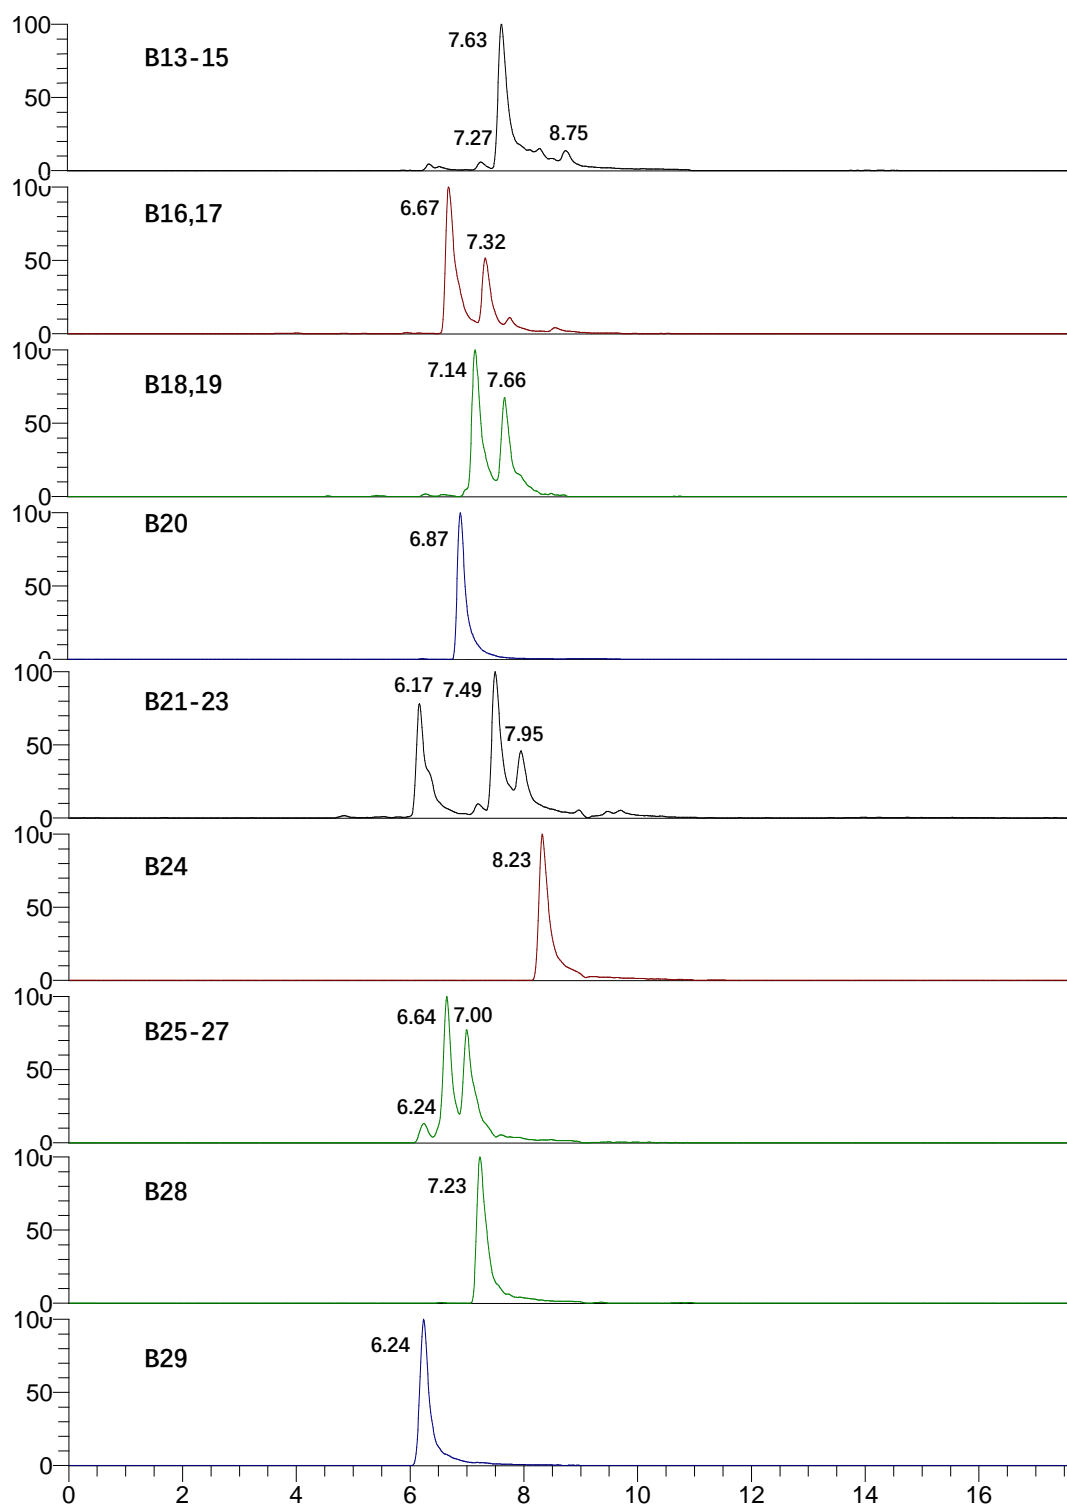

**Figure S3** Extracted ion chromatograms of BZO-HEXOXIZID and its metabolites

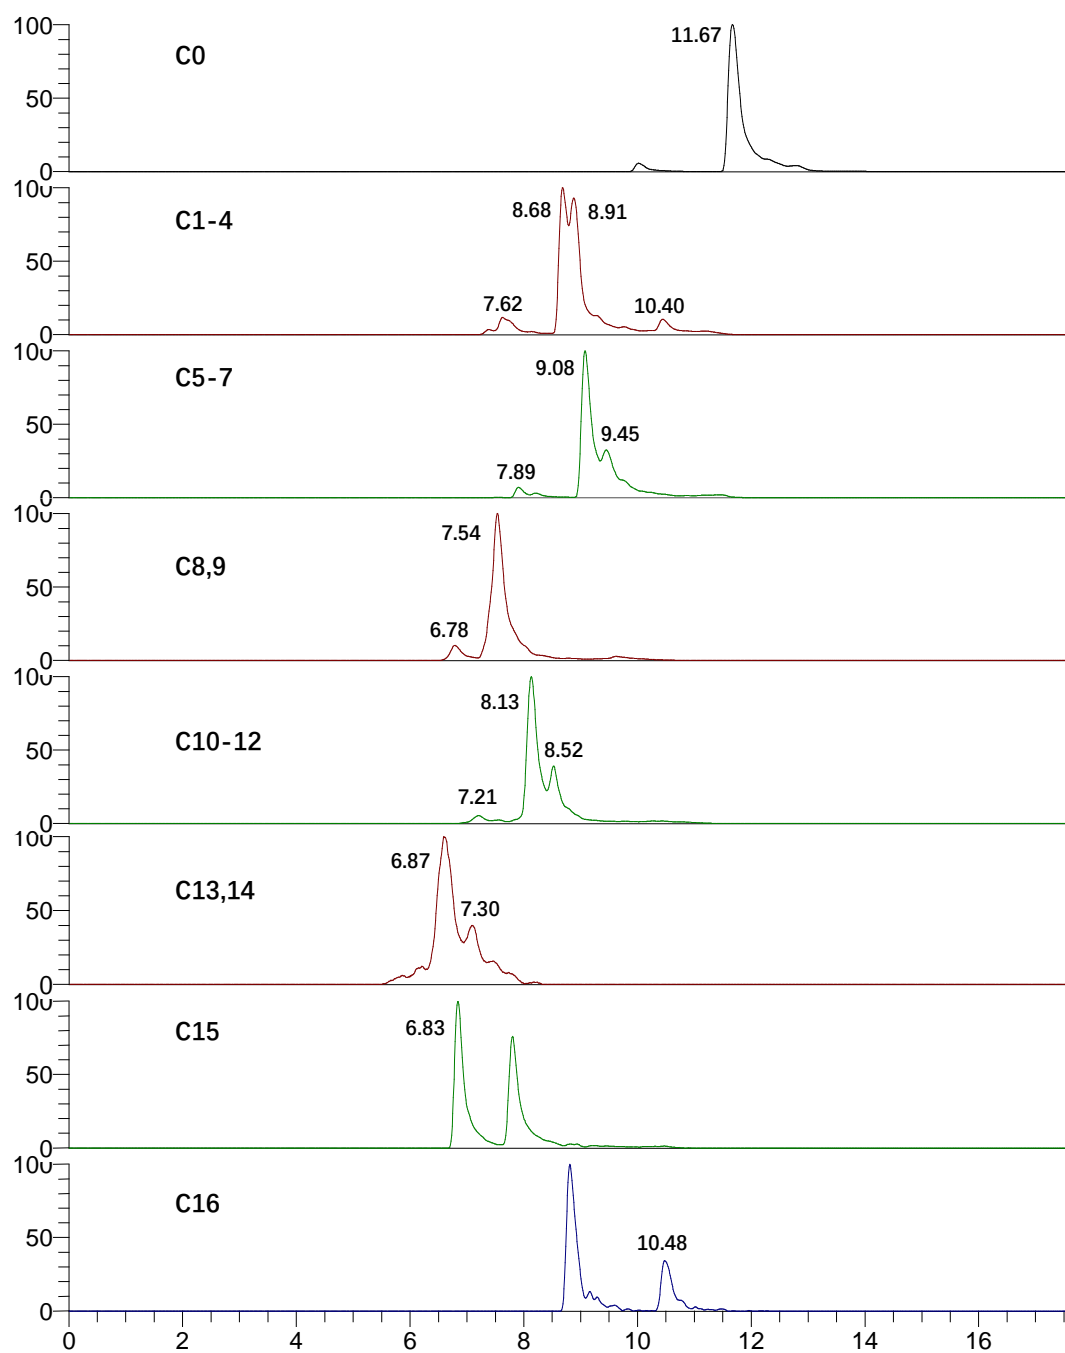

Figure S3 (continued)

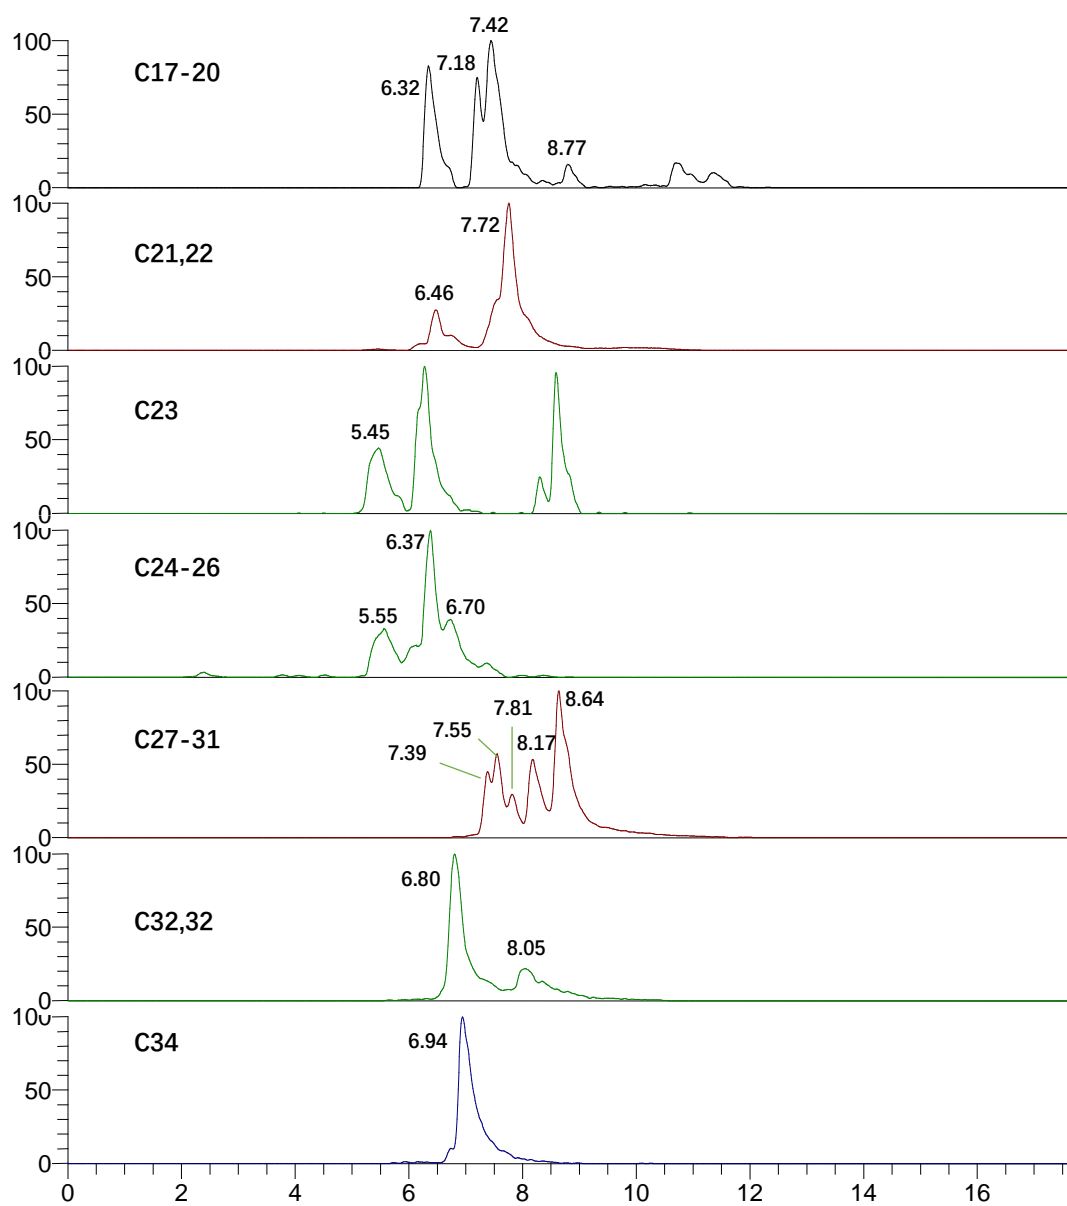

**Figure S4** Extracted ion chromatograms of BZO-POXIZID and its metabolites

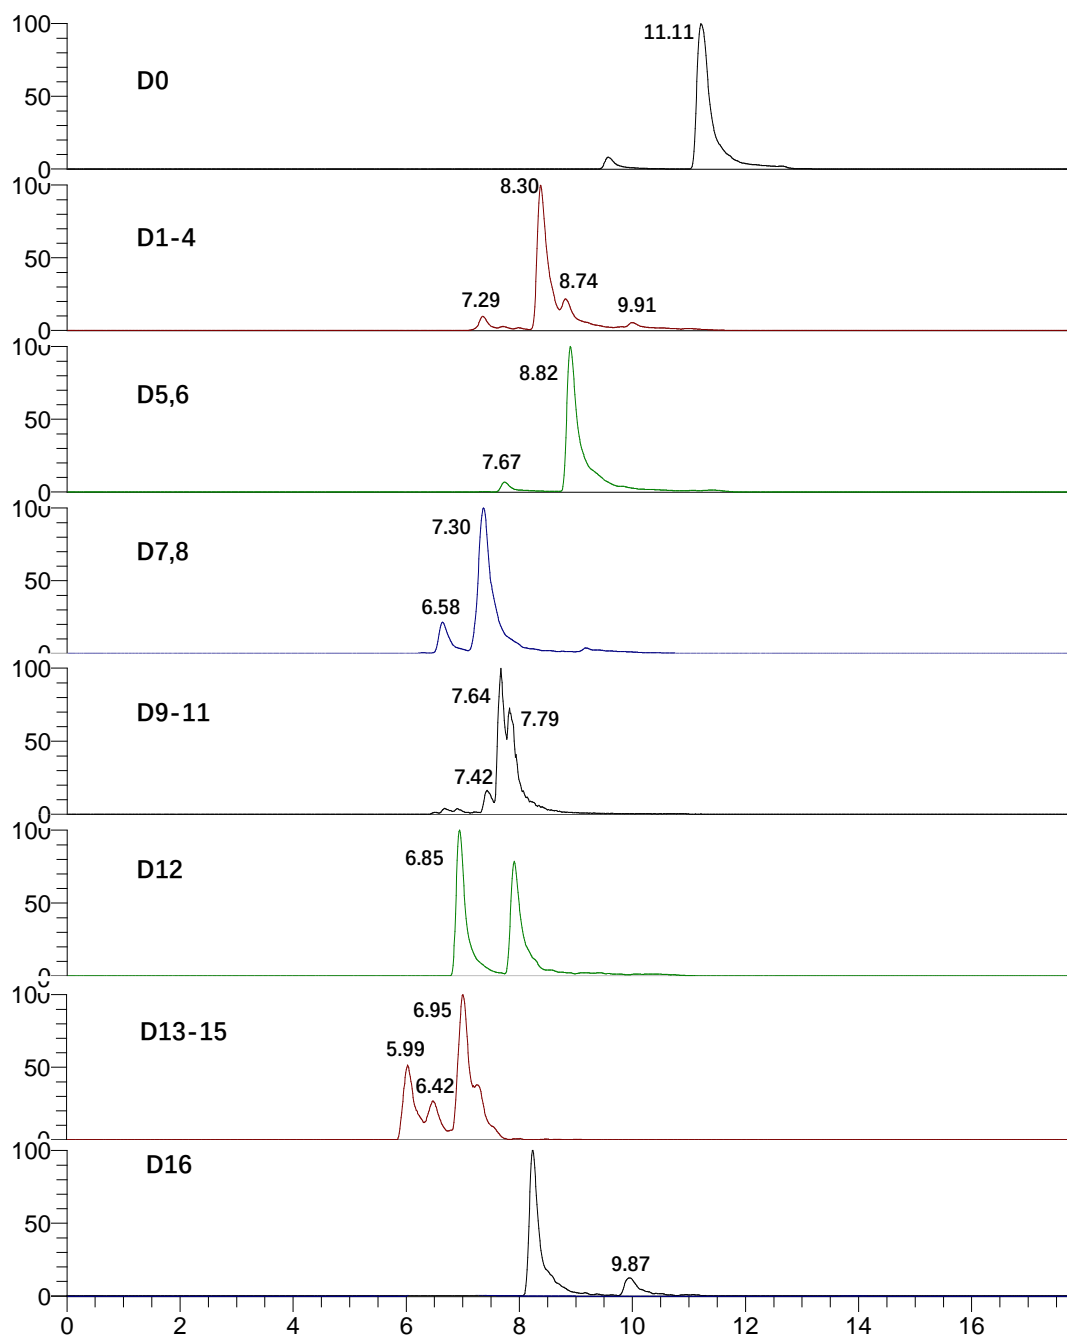

Figure S4 (continued)

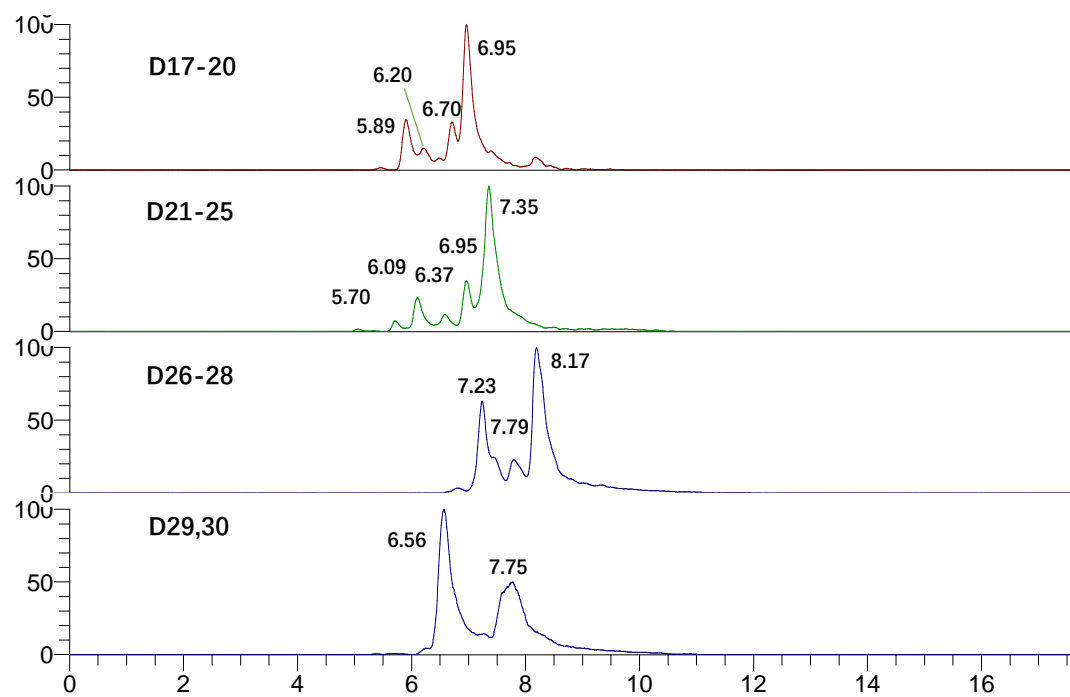

**Figure S5** Extracted ion chromatograms of BZO-4en-POXIZID and its metabolites

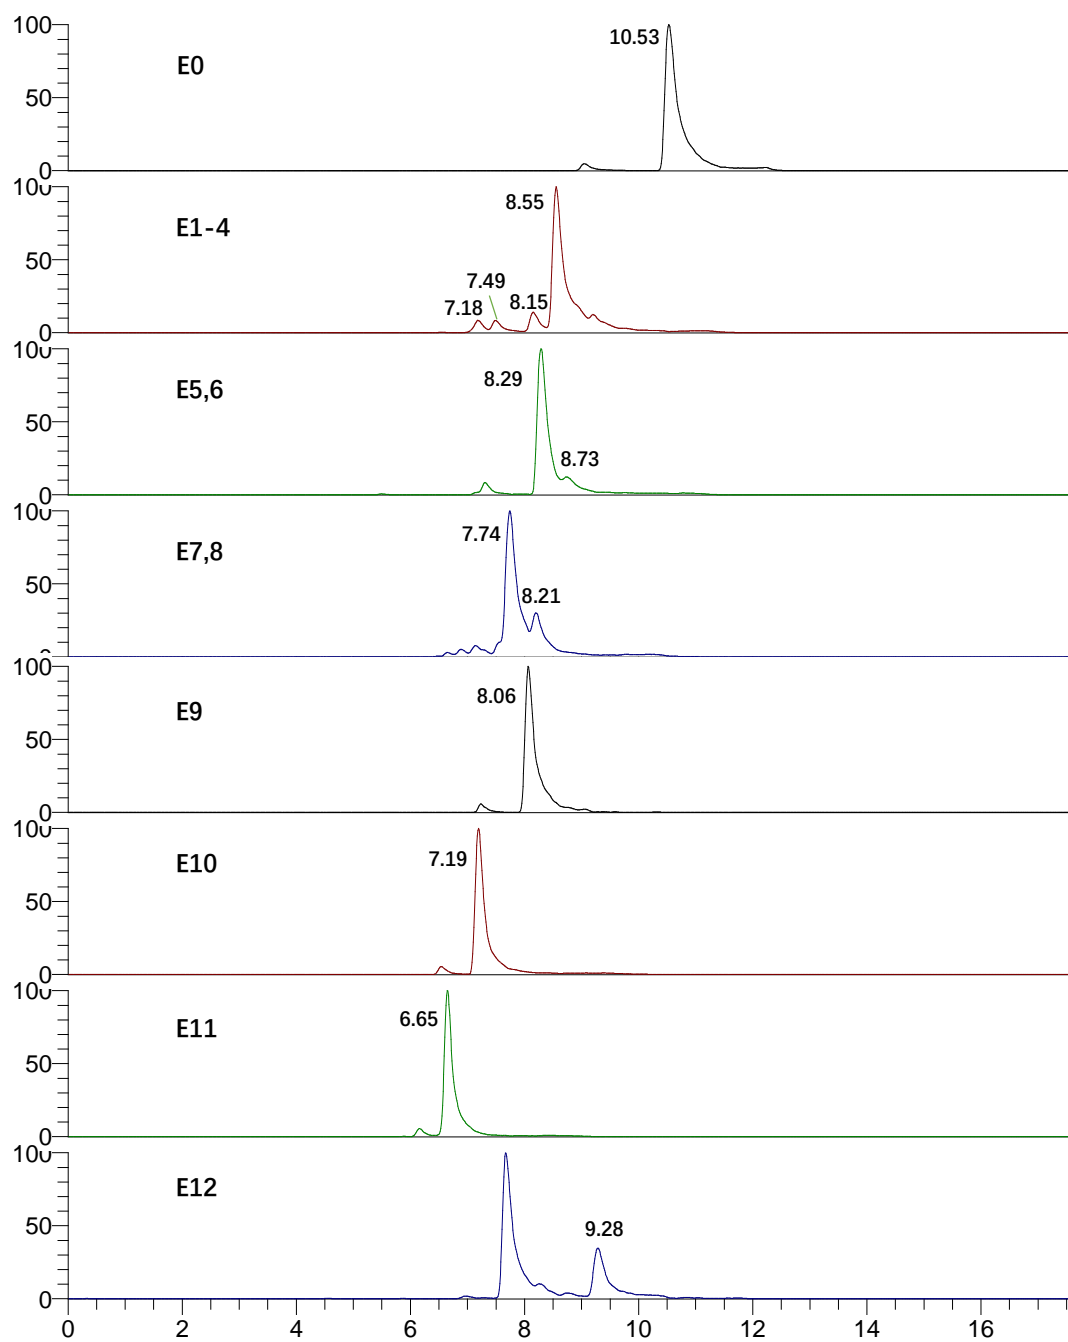



Figure S5 (continued)

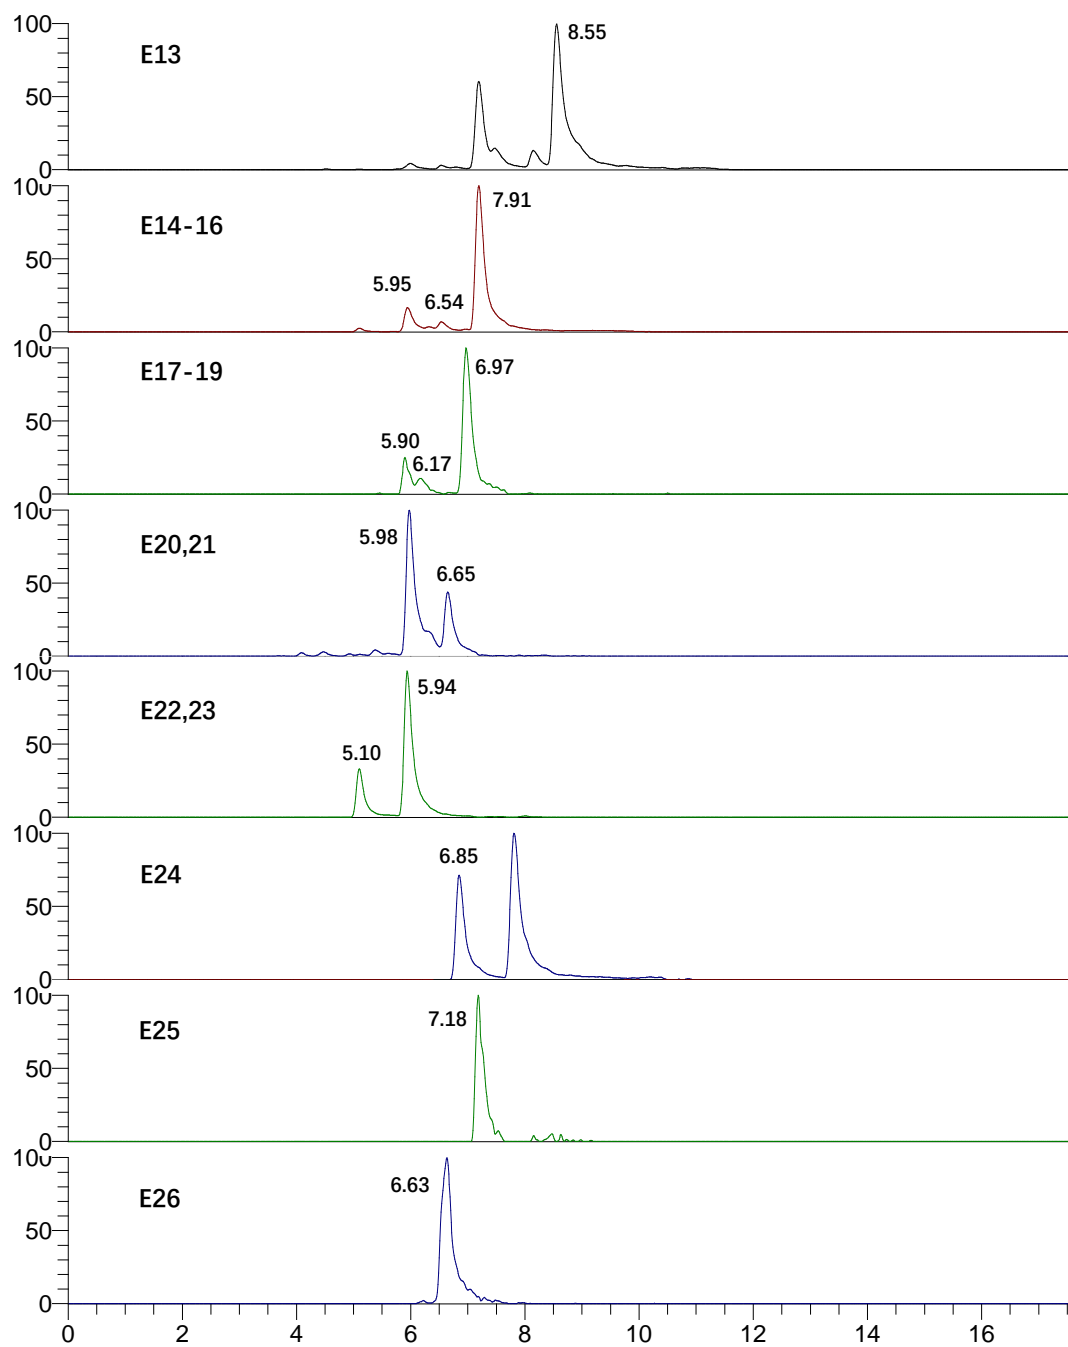

**Figure S6** Extracted ion chromatograms of 5-fluoro BZO-POXIZID and its metabolites

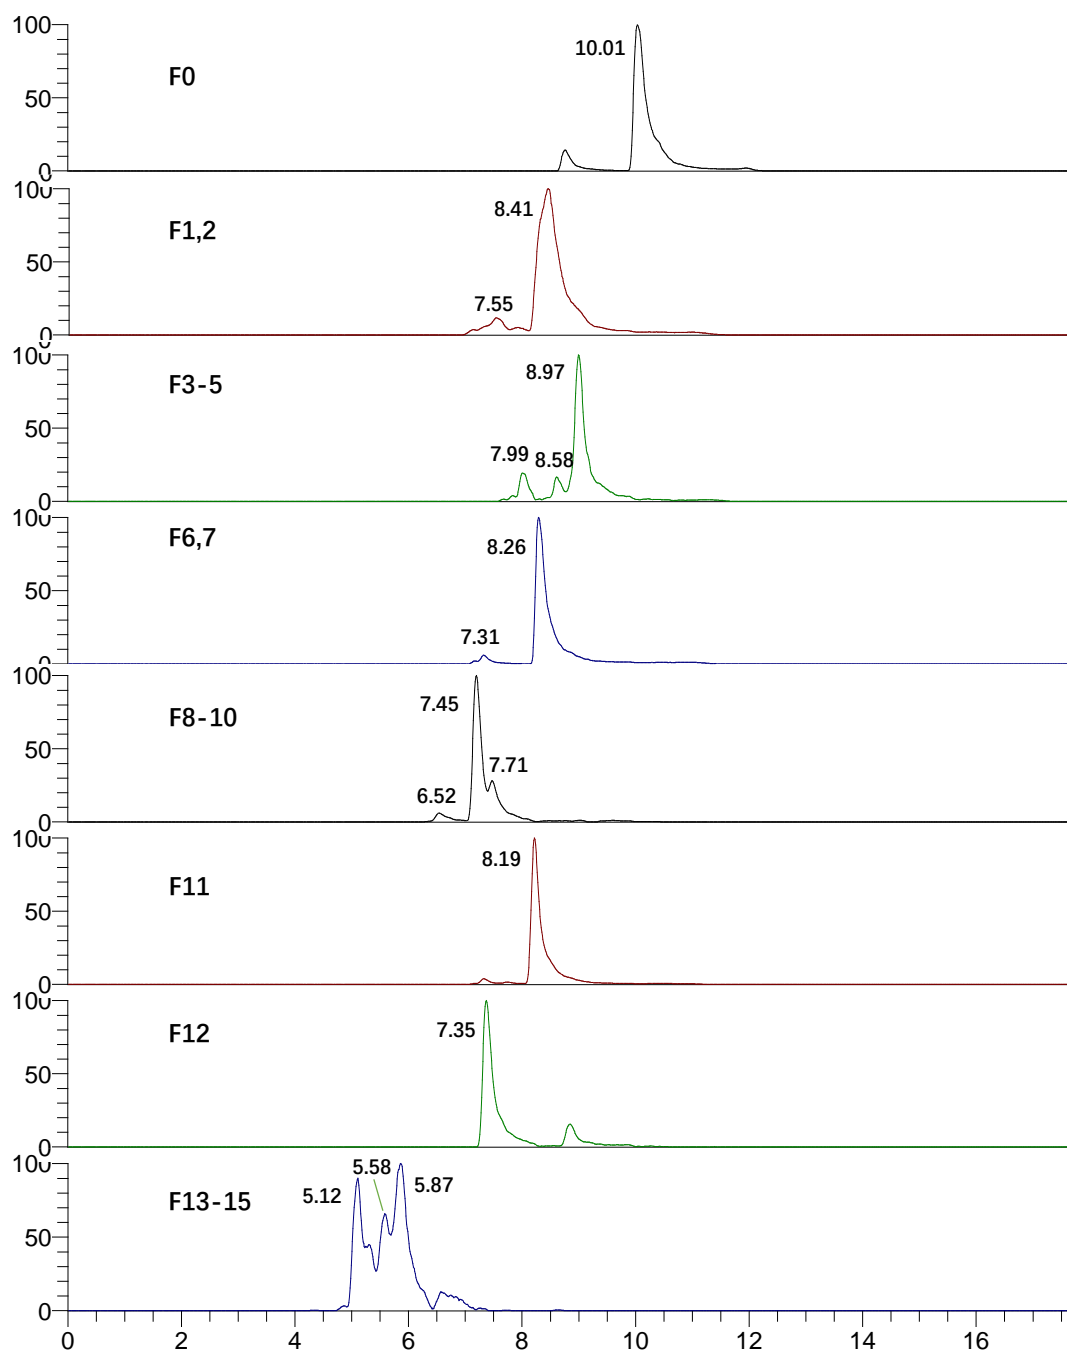

**Figure S6 (continued)**

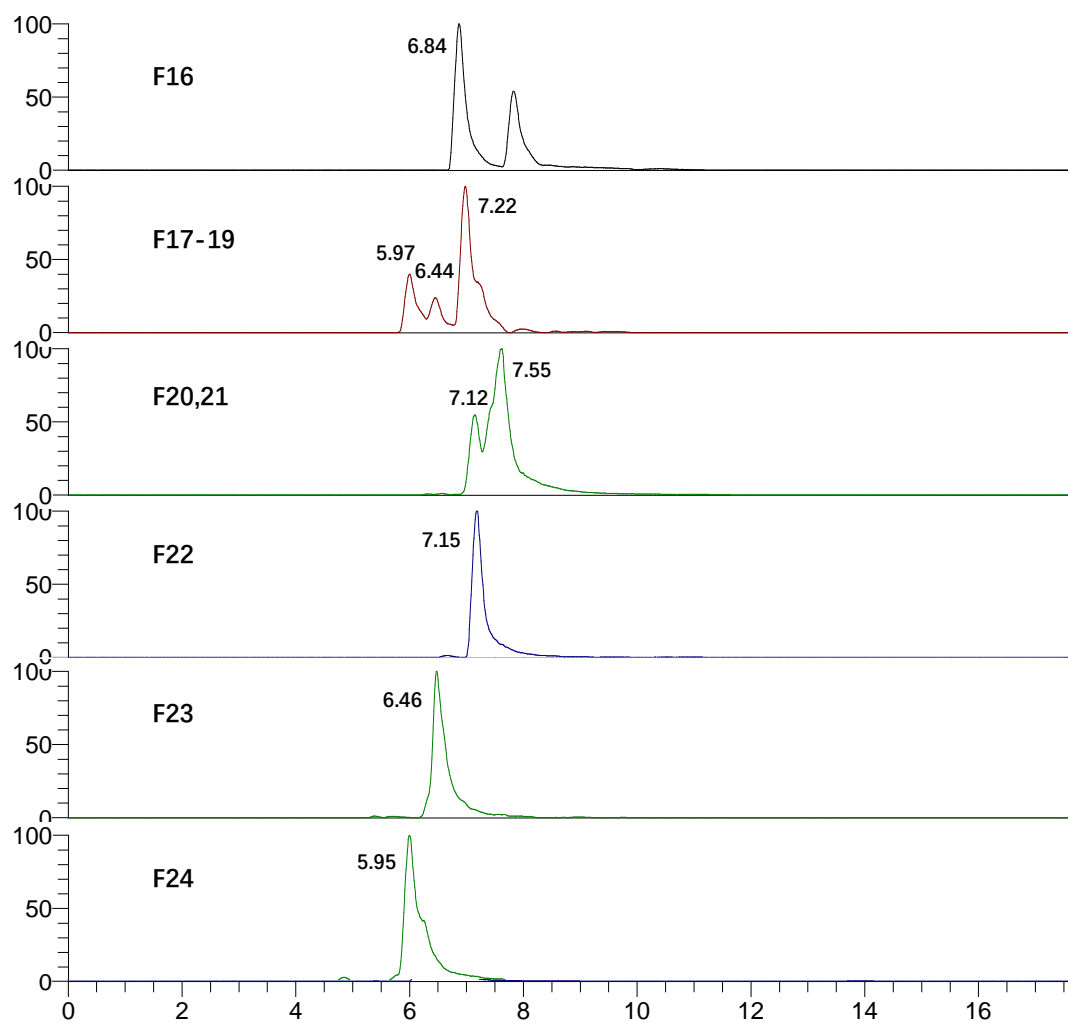

Supplement: s1 [file s1]
